# Supplementary material for: A Novel Role for Minimal Introns: Routing mRNAs to the Cytosol
Source: PubMed Central journal article supplement (PMC2856156; doi:10.1371/journal.pone.0010144), 2010-04-12
Supplement: pone.0010144.s002.pdf [file pone.0010144.s002.pdf]

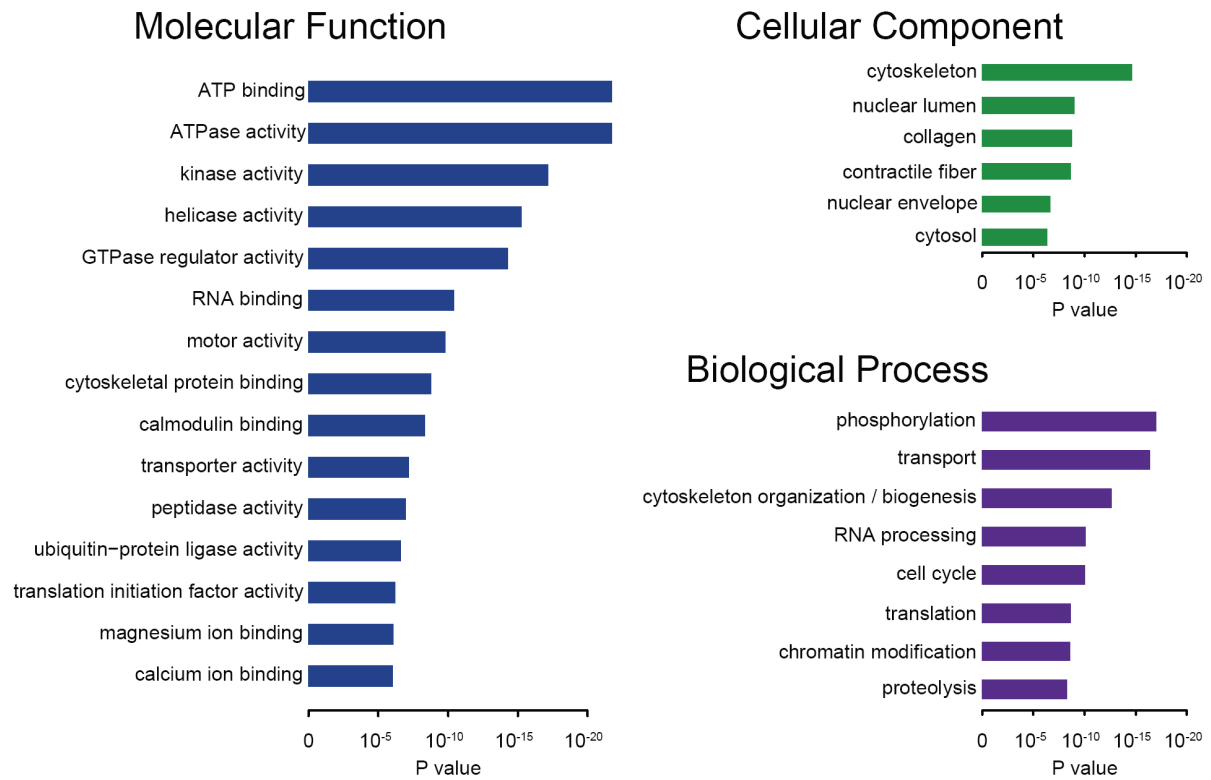

**Figure S1. GO annotation of genes with minimal introns**

The functional categories of genes with minimal introns are based on Gene Ontology (GO) annotations. Enriched functional terms are shown with *P*-values calculated according to the hypergeometric distribution.
