# Supplementary material for: A Novel Role for Minimal Introns: Routing mRNAs to the Cytosol
Source: PLoS One. 2010 Apr 12;5(4):e10144. doi: 10.1371/journal.pone.0010144 (PMC2856156; doi:10.1371/journal.pone.0010144)
Supplement: Table S1 — List of 6,327 human genes with minimal introns. (1.30 MB XLS) [file pone.0010144.s001.xls]

## Sheet: Sheet1
tlID	Position	GeneID	Symbol	Description	miniIntronNo
TL09770	chr2:179098963-179380395:A	7273	TTN	titin	148
TL11421	chr3:48576509-48607597:A	1294	COL7A1	collagen, type VII, alpha 1 (epidermolysis bullosa, dystrophic, dominant and recessive)	74
TL10545	chr20:60317515-60375763:A	3911	LAMA5	laminin, alpha 5	38
TL15782	chr8:145589253-145605541:A	29894	CPSF1	cleavage and polyadenylation specific factor 1, 160kDa	32
TL15136	chr7:149104063-149161986:S	23145	SSPO	SCO-spondin homolog (Bos taurus)	31
TL11518	chr3:52504395-52533551:S	23166	STAB1	stabilin 1	30
TL00254	chr1:22021323-22136337:A	3339	HSPG2	heparan sulfate proteoglycan 2	29
TL16434	chr9:139021506-139043195:A	20	ABCA2	ATP-binding cassette, sub-family A (ABC1), member 2	29
TL11396	chr3:46996176-47026197:S	23218	NBEAL2	neurobeachin-like 2	27
TL17152	chrX:153230093-153256200:A	2316	FLNA	filamin A, alpha (actin binding protein 280)	27
TL07170	chr17:45616455-45633999:A	1277	COL1A1	collagen, type I, alpha 1	26
TL11138	chr22:49232100-49260320:A	6305	SBF1	SET binding factor 1	25
TL00540	chr1:43661383-43690891:S	23334	KIAA0467	KIAA0467	24
TL03784	chr12:47699024-47735374:A	8085	MLL2	myeloid/lymphoid or mixed-lineage leukemia 2	24
TL07998	chr19:9931236-9982147:A	50509	COL5A3	collagen, type V, alpha 3	24
TL05165	chr14:101500733-101586888:S	1778	DYNC1H1	dynein, cytoplasmic 1, heavy chain 1	23
TL06284	chr16:66236530-66248973:S	146206	RLTPR	RGD motif, leucine rich repeats, tropomodulin domain and proline-rich containing	23
TL07482	chr17:77629502-77649395:A	2194	FASN	fatty acid synthase	22
TL09650	chr2:152050098-152299235:A	4703	NEB	nebulin	21
TL11439	chr3:49133550-49145603:A	3913	LAMB2	laminin, beta 2 (laminin S)	21
TL13796	chr6:33238446-33268223:A	1302	COL11A2	collagen, type XI, alpha 2	21
TL02960	chr11:64313184-64327289:A	5871	MAP4K2	mitogen-activated protein kinase kinase kinase kinase 2	20
TL02964	chr11:64418594-64441239:A	23130	ATG2A	ATG2 autophagy related 2 homolog A (S. cerevisiae)	20
TL06294	chr16:66464499-66475907:S	23644	EDC4	enhancer of mRNA decapping 4	20
TL06638	chr17:7563763-7677783:S	146754	DNAH2	dynein, axonemal, heavy chain 2	20
TL06681	chr17:10365189-10393742:A	4620	MYH2	myosin, heavy chain 2, skeletal muscle, adult	20
TL13763	chr6:32090549-32111173:S	720|721	C4A|C4B	complement component 4A (Rodgers blood group)|complement component 4B (Childo blood group)	20
TL15758	chr8:144945077-144969537:A	23513	SCRIB	scribbled homolog (Drosophila)	20
TL00007	chr1:945365-981355:S	375790	AGRN	agrin	19
TL03973	chr12:55808548-55893392:S	4035	LRP1	low density lipoprotein-related protein 1 (alpha-2-macroglobulin receptor)	19
TL04768	chr14:23719264-23727964:A	79711	IPO4	importin 4	19
TL05787	chr16:1324663-1339443:S	8938	BAIAP3	BAI1-associated protein 3	19
TL08347	chr19:40900760-40921619:S	9757	MLL4	myeloid/lymphoid or mixed-lineage leukemia 4	19
TL08414	chr19:43616179-43770044:S	6261	RYR1	ryanodine receptor 1 (skeletal)	19
TL15939	chr9:35687333-35722128:A	7094	TLN1	talin 1	19
TL05816	chr16:1962064-1968752:S	10607	TBL3	transducin (beta)-like 3	18
TL11438	chr3:49121111-49133217:A	10869	USP19	ubiquitin specific peptidase 19	18
TL15765	chr8:145178154-145186959:A	26873	OPLAH	5-oxoprolinase (ATP-hydrolysing)	18
TL02962	chr11:64348237-64368617:A	55561	CDC42BPG	CDC42 binding protein kinase gamma (DMPK-like)	17
TL05760	chr16:639363-657830:S	197335	WDR90	WD repeat domain 90	17
TL05825	chr16:2078711-2125900:A	5310	PKD1	polycystic kidney disease 1 (autosomal dominant)	17
TL06678	chr17:10234366-10265992:A	4626	MYH8	myosin, heavy chain 8, skeletal muscle, perinatal	17
TL06680	chr17:10336348-10362584:A	4619	MYH1	myosin, heavy chain 1, skeletal muscle, adult	17
TL07779	chr19:991101-1016570:S	10347	ABCA7	ATP-binding cassette, sub-family A (ABC1), member 7	17
TL09257	chr2:61268093-61551353:A	9736	USP34	ubiquitin specific peptidase 34	17
TL10334	chr20:33026866-33053897:S	57644	MYH7B	myosin, heavy chain 7B, cardiac muscle, beta	17
TL11136	chr22:49055534-49075336:A	23654	PLXNB2	plexin B2	17
TL15019	chr7:128257718-128286572:S	2318	FLNC	filamin C, gamma (actin binding protein 280)	17
TL15761	chr8:145061308-145121531:A	5339	PLEC1	plectin 1, intermediate filament binding protein 500kDa	17
TL16424	chr9:138866639-138875072:S	158056	MAMDC4	MAM domain containing 4	17
TL17132	chrX:152682904-152697989:S	5365	PLXNB3	plexin B3	17
TL17160	chrX:153339816-153355179:S	55558	PLXNA3	plexin A3	17
TL04756	chr14:23591045-23608777:S	90668	LRRC16B	leucine rich repeat containing 16B	16
TL06269	chr16:65790528-65795428:S	79767	ELMO3	engulfment and cell motility 3	16
TL06501	chr17:1500672-1534926:A	10594	PRPF8	PRP8 pre-mRNA processing factor 8 homolog (S. cerevisiae)	16
TL06679	chr17:10287332-10313601:A	4622	MYH4	myosin, heavy chain 4, skeletal muscle	16
TL10389	chr20:39199574-39237771:S	5335	PLCG1	phospholipase C, gamma 1	16
TL11400	chr3:47397494-47429935:S	25930	PTPN23	protein tyrosine phosphatase, non-receptor type 23	16
TL13749	chr6:31853275-31871691:A	7407	VARS	valyl-tRNA synthetase	16
TL00387	chr1:31890434-31942355:A	1307	COL16A1	collagen, type XVI, alpha 1	15
TL02944	chr11:63775697-63791604:S	5331	PLCB3	phospholipase C, beta 3 (phosphatidylinositol-specific)	15
TL05230	chr15:26029782-26240890:A	8924	HERC2	hect domain and RLD 2	15
TL05316	chr15:39927635-39973567:A	51332	SPTBN5	spectrin, beta, non-erythrocytic 5	15
TL06682	chr17:10472567-10500190:A	4621	MYH3	myosin, heavy chain 3, skeletal muscle, embryonic	15
TL07373	chr17:71334901-71352393:A	201294	UNC13D	unc-13 homolog D (C. elegans)	15
TL08114	chr19:13878051-13902692:S	54862	CC2D1A	coiled-coil and C2 domain containing 1A	15
TL11483	chr3:50375234-50515896:A	9254	CACNA2D2	calcium channel, voltage-dependent, alpha 2/delta subunit 2	15
TL15792	chr8:145707478-145714008:A	9401	RECQL4	RecQ protein-like 4	15
TL16664	chrX:48545430-48568324:S	10013	HDAC6	histone deacetylase 6	15
TL03938	chr12:54808320-54824721:S	23344	FAM62A	family with sequence similarity 62 (C2 domain containing), member A	14
TL05761	chr16:658133-664172:S	89941	RHOT2	ras homolog gene family, member T2	14
TL06495	chr17:1314229-1342751:A	4641	MYO1C	myosin IC	14
TL06639	chr17:7683959-7698843:S	23135	JMJD3	jumonji domain containing 3, histone lysine demethylase	14
TL06738	chr17:18088877-18102780:A	2314	FLII	flightless I homolog (Drosophila)	14
TL08036	chr19:11170970-11234157:A	57572	DOCK6	dedicator of cytokinesis 6	14
TL08890	chr19:60432958-60461850:A	22870	SAPS1	SAPS domain family, member 1	14
TL09455	chr2:97487692-97572761:A	57730	ANKRD36B	ankyrin repeat domain 36B	14
TL11454	chr3:49696391-49701099:A	4485	MST1	macrophage stimulating 1 (hepatocyte growth factor-like)	14
TL13755	chr6:31955515-31973443:A	10919	EHMT2	euchromatic histone-lysine N-methyltransferase 2	14
TL14884	chr7:100115065-100124806:A	64599	GIGYF1	GRB10 interacting GYF protein 1	14
TL15777	chr8:145510761-145521375:A	8694	DGAT1	diacylglycerol O-acyltransferase homolog 1 (mouse)	14
TL00205	chr1:17185039-17210854:A	23400	ATP13A2	ATPase type 13A2	13
TL00562	chr1:45060673-45081203:A	8643	PTCH2	patched homolog 2 (Drosophila)	13
TL01700	chr1:226462483-226633198:S	84033	OBSCN	obscurin, cytoskeletal calmodulin and titin-interacting RhoGEF	13
TL03953	chr12:55097173-55129433:A	8914	TIMELESS	timeless homolog (Drosophila)	13
TL04338	chr12:121885991-121913460:S	9026	HIP1R	huntingtin interacting protein 1 related	13
TL06282	chr16:66120254-66138190:S	79567	FAM65A	family with sequence similarity 65, member A	13
TL06599	chr17:7063876-7069309:S	37	ACADVL	acyl-Coenzyme A dehydrogenase, very long chain	13
TL06610	chr17:7159674-7173362:A	84461	KIAA1787	KIAA1787 protein	13
TL06624	chr17:7328421-7358653:S	5430	POLR2A	polymerase (RNA) II (DNA directed) polypeptide A, 220kDa	13
TL07267	chr17:59250524-59258188:A	117246	FTSJ3	FtsJ homolog 3 (E. coli)	13
TL07931	chr19:6628845-6671662:A	718	C3	complement component 3	13
TL08985	chr19:63747647-63753894:S	10155	TRIM28	tripartite motif-containing 28	13
TL11437	chr3:49108368-49117175:A	5859	QARS	glutaminyl-tRNA synthetase	13
TL11455	chr3:49701993-49733966:S	63891	RNF123	ring finger protein 123	13
TL11460	chr3:49817641-49826395:A	7318	UBA7	ubiquitin-like modifier activating enzyme 7	13
TL11512	chr3:52325559-52409547:S	25981	DNAH1	dynein, axonemal, heavy chain 1	13
TL13290	chr5:141013151-141041984:A	64411	CENTD3	centaurin, delta 3	13
TL13463	chr5:175908970-175955375:S	54825	PCDH24	protocadherin 24	13
TL13760	chr6:32034559-32045511:S	6499	SKIV2L	superkiller viralicidic activity 2-like (S. cerevisiae)	13
TL14804	chr7:93861808-93898480:S	1278	COL1A2	collagen, type I, alpha 2	13
TL15760	chr8:144987903-144994389:A	340371	NRBP2	nuclear receptor binding protein 2	13
TL00341	chr1:27554256-27565924:A	9064	MAP3K6	mitogen-activated protein kinase kinase kinase 6	12
TL02302	chr10:104144218-104152271:S	4791	NFKB2	nuclear factor of kappa light polypeptide gene enhancer in B-cells 2 (p49/p100)	12
TL02490	chr11:407929-432011:A	338440	TMEM16J	transmembrane protein 16J	12
TL02996	chr11:65140358-65161486:S	399909	PCNXL3	pecanex-like 3 (Drosophila)	12
TL03113	chr11:71613472-71627797:S	3636	INPPL1	inositol polyphosphate phosphatase-like 1	12
TL06272	chr16:65820792-65838926:A	29109	FHOD1	formin homology 2 domain containing 1	12
TL06657	chr17:8093361-8114528:S	5198	PFAS	phosphoribosylformylglycinamidine synthase (FGAR amidotransferase)	12
TL07075	chr17:39805075-39822399:A	3674	ITGA2B	integrin, alpha 2b (platelet glycoprotein IIb of IIb/IIIa complex, antigen CD41)	12
TL07369	chr17:71229110-71265494:S	3691	ITGB4	integrin, beta 4	12
TL07926	chr19:6418217-6432798:A	79958	DENND1C	DENN/MADD domain containing 1C	12
TL07966	chr19:8036286-8118385:A	84467	FBN3	fibrillin 3	12
TL08024	chr19:10597228-10616232:S	57153	SLC44A2	solute carrier family 44, member 2	12
TL08087	chr19:12734816-12747434:A	29911	HOOK2	hook homolog 2 (Drosophila)	12
TL08253	chr19:19617009-19633925:A	57130	ATP13A1	ATPase type 13A1	12
TL08354	chr19:40958315-40971564:S	115703	SNX26	sorting nexin 26	12
TL08356	chr19:41008113-41034579:A	4868	NPHS1	nephrosis 1, congenital, Finnish type (nephrin)	12
TL08446	chr19:44628055-44659148:S	6829	SUPT5H	suppressor of Ty 5 homolog (S. cerevisiae)	12
TL08518	chr19:47480656-47491789:S	23152	CIC	capicua homolog (Drosophila)	12
TL10453	chr20:44010698-44034240:A	63925	ZNF335	zinc finger protein 335	12
TL11142	chr22:49293510-49308779:S	29781	NCAPH2	non-SMC condensin II complex, subunit H2	12
TL11413	chr3:48420266-48441746:A	5364	PLXNB1	plexin B1	12
TL12029	chr3:185386556-185394489:S	55324	ABCF3	ATP-binding cassette, sub-family F (GCN20), member 3	12
TL13705	chr6:30989960-31002212:S	57176	VARS2	valyl-tRNA synthetase 2, mitochondrial (putative)	12
TL13732	chr6:31696428-31713533:S	7916	BAT2	HLA-B associated transcript 2	12
TL13815	chr6:33697138-33772326:S	3710	ITPR3	inositol 1,4,5-triphosphate receptor, type 3	12
TL15787	chr8:145662545-145670307:S	90990	KIFC2	kinesin family member C2	12
TL16629	chrX:46935142-46959471:S	7317	UBA1	ubiquitin-like modifier activating enzyme 1	12
TL16682	chrX:48948466-48976777:A	778	CACNA1F	calcium channel, voltage-dependent, L type, alpha 1F subunit	12
TL17137	chrX:152780580-152794505:A	3897	L1CAM	L1 cell adhesion molecule	12
TL00032	chr1:1540746-1555848:S	142678	MIB2	mindbomb homolog 2 (Drosophila)	11
TL00219	chr1:19273586-19409333:A	23352	UBR4	ubiquitin protein ligase E3 component n-recognin 4	11
TL00499	chr1:40538749-40555526:A	1298	COL9A2	collagen, type IX, alpha 2	11
TL00868	chr1:109594163-109619901:S	1952	CELSR2	cadherin, EGF LAG seven-pass G-type receptor 2 (flamingo homolog, Drosophila)	11
TL02518	chr11:1002823-1026706:A	4588	MUC6	mucin 6, oligomeric mucus/gel-forming	11
TL02519	chr11:1132473-1245302:S	4586|727897	MUC5AC|MUC5B	mucin 5AC, oligomeric mucus/gel-forming|mucin 5B, oligomeric mucus/gel-forming	11
TL02762	chr11:46311314-46358680:S	8525	DGKZ	diacylglycerol kinase, zeta 104kDa	11
TL03531	chr12:6549508-6586812:A	1108	CHD4	chromodomain helicase DNA binding protein 4	11
TL04689	chr14:19905765-19946462:A	7011	TEP1	telomerase-associated protein 1	11
TL04765	chr14:23686498-23699710:S	55072	RNF31	ring finger protein 31	11
TL04767	chr14:23711073-23719303:S	9985	REC8	REC8 homolog (yeast)	11
TL05282	chr15:38367389-38387466:A	5330	PLCB2	phospholipase C, beta 2	11
TL05800	chr16:1696221-1760319:S	23162	MAPK8IP3	mitogen-activated protein kinase 8 interacting protein 3	11
TL05860	chr16:3014093-3017752:S	79228	THOC6	THO complex 6 homolog (Drosophila)	11
TL07080	chr17:40192093-40214740:S	4185	ADAM11	ADAM metallopeptidase domain 11	11
TL07780	chr19:1018173-1037627:S	23526	HMHA1	histocompatibility (minor) HA-1	11
TL08083	chr19:12671014-12694078:A	30000	TNPO2	transportin 2 (importin 3, karyopherin beta 2b)	11
TL08883	chr19:60294092-60320739:A	54776	PPP1R12C	protein phosphatase 1, regulatory (inhibitor) subunit 12C	11
TL10163	chr20:3156062-3166373:A	83959	SLC4A11	solute carrier family 4, sodium borate transporter, member 11	11
TL10573	chr20:61659882-61676036:A	85441	PRIC285	peroxisomal proliferator-activated receptor A interacting complex 285	11
TL11453	chr3:49686438-49695938:S	327	APEH	N-acylaminoacyl-peptide hydrolase	11
TL13929	chr6:43257899-43300303:S	23113	PARC	p53-associated parkin-like cytoplasmic protein	11
TL14621	chr7:44110484-44120684:S	165	AEBP1	AE binding protein 1	11
TL15774	chr8:145456863-145485928:A	23246	BOP1	block of proliferation 1	11
TL15781	chr8:145568538-145589261:S	203054	ADCK5	aarF domain containing kinase 5	11
TL16882	chrX:101356935-101468287:S	56001	NXF2	nuclear RNA export factor 2	11
TL00567	chr1:45567500-45578729:A	4595	MUTYH	mutY homolog (E. coli)	10
TL02487	chr11:359803-371792:S	338707	B4GALNT4	beta-1,4-N-acetyl-galactosaminyl transferase 4	10
TL02509	chr11:789178-795245:A	55367	LRDD	leucine-rich repeats and death domain containing	10
TL02911	chr11:62316173-62329540:A	10482	NXF1	nuclear RNA export factor 1	10
TL03012	chr11:65485735-65504183:S	9092	SART1	squamous cell carcinoma antigen recognized by T cells	10
TL03375	chr11:118420105-118433126:A	10525	HYOU1	hypoxia up-regulated 1	10
TL03867	chr12:51727076-51744429:S	23371	TENC1	tensin like C1 domain containing phosphatase (tensin 2)	10
TL03906	chr12:53075311-53099317:A	3678	ITGA5	integrin, alpha 5 (fibronectin receptor, alpha polypeptide)	10
TL03917	chr12:54364618-54387894:A	3679	ITGA7	integrin, alpha 7	10
TL03949	chr12:54996986-55014017:A	9924	PAN2	PAN2 polyA specific ribonuclease subunit homolog (S. cerevisiae)	10
TL05964	chr16:18723675-18844887:A	23049	SMG1	PI-3-kinase-related kinase SMG-1	10
TL06109	chr16:30681130-30694039:S	9810	RNF40	ring finger protein 40	10
TL06132	chr16:31274009-31301819:S	3687	ITGAX	integrin, alpha X (complement component 3 receptor 4 subunit)	10
TL06274	chr16:65868913-65880884:S	25894	PLEKHG4	pleckstrin homology domain containing, family G (with RhoGef domain) member 4	10
TL06285	chr16:66248915-66252219:A	65057	ACD	adrenocortical dysplasia homolog (mouse)	10
TL06305	chr16:66819950-66827637:A	80004	RBM35B	RNA binding motif protein 35B	10
TL06677	chr17:10144907-10217047:A	8735	MYH13	myosin, heavy chain 13, skeletal muscle	10
TL06735	chr17:17952744-18023841:S	51168	MYO15A	myosin XVA	10
TL06797	chr17:23965584-23996300:A	9703	KIAA0100	KIAA0100	10
TL07979	chr19:8551125-8581588:A	81794	ADAMTS10	ADAM metallopeptidase with thrombospondin type 1 motif, 10	10
TL08140	chr19:15131443-15172792:A	4854	NOTCH3	Notch homolog 3 (Drosophila)	10
TL08252	chr19:19601284-19615455:A	51291	GMIP	GEM interacting protein	10
TL08415	chr19:43770120-43800483:A	11184	MAP4K1	mitogen-activated protein kinase kinase kinase kinase 1	10
TL08441	chr19:44568109-44573519:A	54623	PAF1	Paf1, RNA polymerase II associated factor, homolog (S. cerevisiae)	10
TL09088	chr2:26533574-26635070:A	9381	OTOF	otoferlin	10
TL09445	chr2:96672300-96734351:S	90342	FER1L5	fer-1-like 5 (C. elegans)	10
TL10167	chr20:3596619-3610738:A	80332	ADAM33	ADAM metallopeptidase domain 33	10
TL10576	chr20:61760090-61800479:S	51750|8771	RTEL1|TNFRSF6B	regulator of telomere elongation helicase 1|tumor necrosis factor receptor superfamily, member 6b, decoy	10
TL11141	chr22:49288245-49292979:A	91289	LMF2	lipase maturation factor 2	10
TL12039	chr3:185580554-185590311:S	8646	CHRD	chordin	10
TL13486	chr5:176871183-176876573:A	51428	DDX41	DEAD (Asp-Glu-Ala-Asp) box polypeptide 41	10
TL13804	chr6:33367413-33374716:A	5863	RGL2	ral guanine nucleotide dissociation stimulator-like 2	10
TL14425	chr7:1476438-1510544:A	26173	INTS1	integrator complex subunit 1	10
TL14877	chr7:100009569-100021712:A	4034	LRCH4	leucine-rich repeats and calponin homology (CH) domain containing 4	10
TL15159	chr7:150387589-150404547:S	6522	SLC4A2	solute carrier family 4, anion exchanger, member 2 (erythrocyte membrane protein band 3-like 1)	10
TL15898	chr9:33451350-33463941:A	65083	NOL6	nucleolar protein family 6 (RNA-associated)	10
TL16628	chrX:46889574-46931156:S	8241	RBM10	RNA binding motif protein 10	10
TL16883	chrX:101501971-101613388:A	728343	NXF2B	nuclear RNA export factor 2B	10
TL00315	chr1:26376589-26388962:S	10256	CNKSR1	connector enhancer of kinase suppressor of Ras 1	9
TL00483	chr1:39319704-39725376:S	23499	MACF1	microtubule-actin crosslinking factor 1	9
TL00564	chr1:45240806-45249614:A	79654	HECTD3	HECT domain containing 3	9
TL02104	chr10:75215610-75231557:S	23053	KIAA0913	KIAA0913	9
TL02622	chr11:10775168-10787158:A	1982	EIF4G2	eukaryotic translation initiation factor 4 gamma, 2	9
TL02972	chr11:64568870-64582585:A	10004	NAALADL1	N-acetylated alpha-linked acidic dipeptidase-like 1	9
TL02979	chr11:64651326-64658579:A	84447	SYVN1	synovial apoptosis inhibitor 1, synoviolin	9
TL02990	chr11:65062849-65082006:A	4054	LTBP3	latent transforming growth factor beta binding protein 3	9
TL03049	chr11:66790480-66810605:S	156	ADRBK1	adrenergic, beta, receptor kinase 1	9
TL03064	chr11:67015814-67028416:A	9600	PITPNM1	phosphatidylinositol transfer protein, membrane-associated 1	9
TL03386	chr11:118684443-118693050:A	4162	MCAM	melanoma cell adhesion molecule	9
TL03527	chr12:6473557-6511072:S	9918	NCAPD2	non-SMC condensin I complex, subunit D2	9
TL03958	chr12:55275646-55316430:A	11176	BAZ2A	bromodomain adjacent to zinc finger domain, 2A	9
TL04290	chr12:119049396-119116896:A	10985	GCN1L1	GCN1 general control of amino-acid synthesis 1-like 1 (yeast)	9
TL04386	chr12:131710420-131774018:A	5426	POLE	polymerase (DNA directed), epsilon	9
TL04653	chr13:109599310-109757497:A	1282	COL4A1	collagen, type IV, alpha 1	9
TL05205	chr14:104679120-104706206:A	3714	JAG2	jagged 2	9
TL05310	chr15:39583131-39593791:A	4058	LTK	leukocyte receptor tyrosine kinase	9
TL05574	chr15:73435185-73447994:A	4123	MAN2C1	mannosidase, alpha, class 2C, member 1	9
TL05775	chr16:778622-788075:S	63922	CHTF18	CTF18, chromosome transmission fidelity factor 18 homolog (S. cerevisiae)	9
TL05789	chr16:1341932-1353353:S	84572	GNPTG	N-acetylglucosamine-1-phosphate transferase, gamma subunit	9
TL05828	chr16:2167184-2186466:A	57524	CASKIN1	CASK interacting protein 1	9
TL06133	chr16:31312133-31345327:S	3681	ITGAD	integrin, alpha D	9
TL06417	chr16:82768961-82778163:A	9013	TAF1C	TATA box binding protein (TBP)-associated factor, RNA polymerase I, C, 110kDa	9
TL06519	chr17:2539429-2561677:A	23277	KIAA0664	KIAA0664	9
TL06540	chr17:4388939-4405430:A	10514	MYBBP1A	MYB binding protein (P160) 1a	9
TL06600	chr17:7069384-7078587:A	1856	DVL2	dishevelled, dsh homolog 2 (Drosophila)	9
TL06611	chr17:7180596-7195517:S	9744	CENTB1	centaurin, beta 1	9
TL06652	chr17:7984514-7996427:A	5187	PER1	period homolog 1 (Drosophila)	9
TL06656	chr17:8070917-8092138:A	80169	C17orf68	chromosome 17 open reading frame 68	9
TL06795	chr17:23928709-23950183:A	10615	SPAG5	sperm associated antigen 5	9
TL06959	chr17:35798321-35827695:A	7153	TOP2A	topoisomerase (DNA) II alpha 170kDa	9
TL07070	chr17:39637926-39653776:A	7343	UBTF	upstream binding transcription factor, RNA polymerase I	9
TL07364	chr17:71007936-71023222:A	57513	CASKIN2	CASK interacting protein 2	9
TL07783	chr19:1058632-1125282:A	22904	SBNO2	strawberry notch homolog 2 (Drosophila)	9
TL07812	chr19:1892160-1932336:S	1455	CSNK1G2	casein kinase 1, gamma 2	9
TL08021	chr19:10524760-10537702:A	65095	KRI1	KRI1 homolog (S. cerevisiae)	9
TL08184	chr19:17295033-17306638:A	57719	TMEM16H	transmembrane protein 16H	9
TL08217	chr19:18391135-18406459:S	170463	SSBP4	single stranded DNA binding protein 4	9
TL08522	chr19:47521600-47574761:S	1954	MEGF8	multiple EGF-like-domains 8	9
TL08597	chr19:50546685-50565669:A	2068	ERCC2	excision repair cross-complementing rodent repair deficiency, complementation group 2 (xeroderma pigmentosum D)	9
TL08740	chr19:55056272-55062630:A	11284	PNKP	polynucleotide kinase 3'-phosphatase	9
TL09439	chr2:96303800-96334988:A	23020	ASCC3L1	activating signal cointegrator 1 complex subunit 3-like 1	9
TL09451	chr2:96889199-96899462:A	54910	SEMA4C	sema domain, immunoglobulin domain (Ig), transmembrane domain (TM) and short cytoplasmic domain, (semaphorin) 4C	9
TL09973	chr2:220007943-220066598:S	10290	SPEG	SPEG complex locus	9
TL10346	chr20:33677379-33716262:A	10137|8904	CPNE1|RBM12	RNA binding motif protein 12|copine I	9
TL11132	chr22:48998244-49025527:A	85378	TUBGCP6	tubulin, gamma complex associated protein 6	9
TL11133	chr22:49025739-49031941:A	83933	HDAC10	histone deacetylase 10	9
TL11146	chr22:49354155-49368260:A	1120|1375	CHKB|CPT1B	carnitine palmitoyltransferase 1B (muscle)|choline kinase beta	9
TL12034	chr3:185515049-185535840:S	1981	EIF4G1	eukaryotic translation initiation factor 4 gamma, 1	9
TL12036	chr3:185547033-185562085:A	1181	CLCN2	chloride channel 2	9
TL13244	chr5:137543247-137551261:S	10112	KIF20A	kinesin family member 20A	9
TL13754	chr6:31938948-31954802:A	80736	SLC44A4	solute carrier family 44, member 4	9
TL13765	chr6:32116910-32185131:A	7148	TNXB	tenascin XB	9
TL13924	chr6:43113332-43129632:A	9820	CUL7	cullin 7	9
TL14881	chr7:100055974-100077109:A	7036	TFR2	transferrin receptor 2	9
TL15772	chr8:145274906-145388831:S	727957	KIAA1833	hypothetical protein KIAA1833	9
TL15785	chr8:145624996-145640466:A	4796	NFKBIL2	nuclear factor of kappa light polypeptide gene enhancer in B-cells inhibitor-like 2	9
TL15790	chr8:145700232-145703357:S	2875	GPT	glutamic-pyruvate transaminase (alanine aminotransferase)	9
TL16291	chr9:130057928-130078089:A	2801	GOLGA2	golgi autoantigen, golgin subfamily a, 2	9
TL16300	chr9:130354686-130435761:S	6709	SPTAN1	spectrin, alpha, non-erythrocytic 1 (alpha-fodrin)	9
TL16631	chrX:46977257-46992671:S	8237	USP11	ubiquitin specific peptidase 11	9
TL16730	chrX:53417794-53466343:A	8243	SMC1A	structural maintenance of chromosomes 1A	9
TL17140	chrX:152826024-152844892:A	393	ARHGAP4	Rho GTPase activating protein 4	9
TL00004	chr1:891739-900347:S	84069	PLEKHN1	pleckstrin homology domain containing, family N member 1	8
TL00016	chr1:1218806-1228503:A	116983	CENTB5	centaurin, beta 5	8
TL00018	chr1:1236827-1249909:A	54973	CPSF3L	cleavage and polyadenylation specific factor 3-like	8
TL00546	chr1:44185229-44206012:S	9670	IPO13	importin 13	8
TL00560	chr1:45038622-45044254:S	1263	PLK3	polo-like kinase 3 (Drosophila)	8
TL01163	chr1:153290385-153301876:S	8751	ADAM15	ADAM metallopeptidase domain 15	8
TL01227	chr1:155130146-155152850:S	375033	PEAR1	platelet endothelial aggregation receptor 1	8
TL02499	chr11:606574-615007:A	53841	MUPCDH	mucin-like protocadherin	8
TL02504	chr11:696122-717727:S	64787	EPS8L2	EPS8-like 2	8
TL02585	chr11:6599133-6633650:A	8642	DCHS1	dachsous 1 (Drosophila)	8
TL02892	chr11:62126266-62136813:A	256364	EML3	echinoderm microtubule associated protein like 3	8
TL02952	chr11:63864270-63881582:S	283234	CCDC88B	coiled-coil domain containing 88B	8
TL02993	chr11:65100084-65116692:S	254102	EHBP1L1	EH domain binding protein 1-like 1	8
TL02999	chr11:65236064-65243651:S	10524	HTATIP	HIV-1 Tat interacting protein, 60kDa	8
TL03058	chr11:66952510-66959455:S	6199	RPS6KB2	ribosomal protein S6 kinase, 70kDa, polypeptide 2	8
TL03763	chr12:46653014-46684552:A	1280	COL2A1	collagen, type II, alpha 1	8
TL04335	chr12:121577761-121676900:S	9735	KNTC1	kinetochore associated 1	8
TL04747	chr14:22951786-22974710:A	4625	MYH7	myosin, heavy chain 7, cardiac muscle, beta	8
TL04750	chr14:23098615-23107119:A	8906	AP1G2	adaptor-related protein complex 1, gamma 2 subunit	8
TL05733	chr16:48057-62591:A	64285	RHBDF1	rhomboid 5 homolog 1 (Drosophila)	8
TL05745	chr16:273118-277210:S	64714	PDIA2	protein disulfide isomerase family A, member 2	8
TL05769	chr16:712582-716460:A	124093	CCDC78	coiled-coil domain containing 78	8
TL05991	chr16:21116273-21130369:A	7783	ZP2	zona pellucida glycoprotein 2 (sperm receptor)	8
TL06017	chr16:23609126-23632322:A	10595	ERN2	endoplasmic reticulum to nucleus signaling 2	8
TL06038	chr16:28298400-28322663:A	728689	EIF3CL	eukaryotic translation initiation factor 3, subunit C-like	8
TL06048	chr16:28630282-28654551:S	8663	EIF3C	eukaryotic translation initiation factor 3, subunit C	8
TL06049	chr16:28741914-28756059:S	11273	ATXN2L	ataxin 2-like	8
TL06097	chr16:30391483-30442007:S	3683	ITGAL	integrin, alpha L (antigen CD11A (p180), lymphocyte function-associated antigen 1; alpha polypeptide)	8
TL06106	chr16:30617962-30658951:S	10847	SRCAP	Snf2-related CREBBP activator protein	8
TL06267	chr16:65775782-65781608:A	283849	EXOC3L	exocyst complex component 3-like	8
TL06553	chr17:4657377-4673694:S	5338	PLD2	phospholipase D2	8
TL06598	chr17:7033933-7063781:A	1742	DLG4	discs, large homolog 4 (Drosophila)	8
TL06643	chr17:7728847-7756800:S	1107	CHD3	chromodomain helicase DNA binding protein 3	8
TL06820	chr17:24944652-24965905:S	124930	ANKRD13B	ankyrin repeat domain 13B	8
TL07008	chr17:37518654-37526908:A	2648	GCN5L2	GCN5 general control of amino-acid synthesis 5-like 2 (yeast)	8
TL07118	chr17:43239731-43254146:A	114881	OSBPL7	oxysterol binding protein-like 7	8
TL07922	chr19:6364118-6375822:A	8570	KHSRP	KH-type splicing regulatory protein	8
TL08091	chr19:12810347-12846765:S	22983	MAST1	microtubule associated serine/threonine kinase 1	8
TL08139	chr19:15086784-15097577:A	10994	ILVBL	ilvB (bacterial acetolactate synthase)-like	8
TL08218	chr19:18406624-18409943:A	51477	ISYNA1	myo-inositol 1-phosphate synthase A1	8
TL08341	chr19:40795485-40808091:S	23354	KIAA0841	KIAA0841	8
TL08408	chr19:43518297-43553422:S	57828	C19orf15	chromosome 19 open reading frame 15	8
TL08508	chr19:47079106-47103444:S	9138	ARHGEF1	Rho guanine nucleotide exchange factor (GEF) 1	8
TL08521	chr19:47509316-47521054:S	284339	TMEM145	transmembrane protein 145	8
TL08736	chr19:54961991-55002181:S	160	AP2A1	adaptor-related protein complex 2, alpha 1 subunit	8
TL08753	chr19:55579404-55613083:S	5424	POLD1	polymerase (DNA directed), delta 1, catalytic subunit 125kDa	8
TL09107	chr2:27293761-27320158:S	790	CAD	carbamoyl-phosphate synthetase 2, aspartate transcarbamylase, and dihydroorotase	8
TL09346	chr2:74441789-74461472:A	1639	DCTN1	dynactin 1 (p150, glued homolog, Drosophila)	8
TL09797	chr2:189547343-189585717:S	1281	COL3A1	collagen, type III, alpha 1 (Ehlers-Danlos syndrome type IV, autosomal dominant)	8
TL10242	chr20:21231941-21318463:S	22803	XRN2	5'-3' exoribonuclease 2	8
TL10584	chr20:62041632-62058212:A	54963	UCKL1	uridine-cytidine kinase 1-like 1	8
TL10743	chr21:46226090-46249391:S	1291	COL6A1	collagen, type VI, alpha 1	8
TL11405	chr3:47819654-47866687:S	22907	DHX30	DEAH (Asp-Glu-Ala-His) box polypeptide 30	8
TL11433	chr3:49027438-49033471:A	55152	DALRD3	DALR anticodon binding domain containing 3	8
TL11435	chr3:49036765-49041879:A	3615	IMPDH2	IMP (inosine monophosphate) dehydrogenase 2	8
TL11463	chr3:49899439-49916310:A	4486	MST1R	macrophage stimulating 1 receptor (c-met-related tyrosine kinase)	8
TL11471	chr3:50280043-50289576:S	7869	SEMA3B	sema domain, immunoglobulin domain (Ig), short basic domain, secreted, (semaphorin) 3B	8
TL11473	chr3:50300123-50304923:A	7866	IFRD2	interferon-related developmental regulator 2	8
TL11519	chr3:52533442-52544110:A	64943	NT5DC2	5'-nucleotidase domain containing 2	8
TL13469	chr5:176240475-176258921:A	3101	HK3	hexokinase 3 (white cell)	8
TL13472	chr5:176446526-176457732:S	2264	FGFR4	fibroblast growth factor receptor 4	8
TL13691	chr6:30647148-30667288:S	23	ABCF1	ATP-binding cassette, sub-family F (GCN20), member 1	8
TL13757	chr6:32003472-32021427:S	717	C2	complement component 2	8
TL13809	chr6:33486771-33492193:S	5252	PHF1	PHD finger protein 1	8
TL14033	chr6:70633168-70978878:S	1310	COL19A1	collagen, type XIX, alpha 1	8
TL14410	chr6_cox_hap1:4627021-4637132:A	9277	WDR46	WD repeat domain 46	8
TL14856	chr7:99537065-99542739:S	9179	AP4M1	adaptor-related protein complex 4, mu 1 subunit	8
TL15154	chr7:150319079-150342609:S	4846	NOS3	nitric oxide synthase 3 (endothelial cell)	8
TL15618	chr8:103334744-103493671:A	51366	UBR5	ubiquitin protein ligase E3 component n-recognin 5	8
TL15762	chr8:145123307-145132623:A	84875	PARP10	poly (ADP-ribose) polymerase family, member 10	8
TL15767	chr8:145209511-145213107:S	8733	GPAA1	glycosylphosphatidylinositol anchor attachment protein 1 homolog (yeast)	8
TL16303	chr9:130504622-130523020:S	29941	PKN3	protein kinase N3	8
TL16312	chr9:130749797-130809195:S	23511	NUP188	nucleoporin 188kDa	8
TL16442	chr9:139124812-139129016:A	29952	DPP7	dipeptidyl-peptidase 7	8
TL16443	chr9:139153429-139183029:S	2902	GRIN1	glutamate receptor, ionotropic, N-methyl D-aspartate 1	8
TL16448	chr9:139220003-139231282:S	27158	NDOR1	NADPH dependent diflavin oxidoreductase 1	8
TL16630	chrX:46962575-46974338:S	5127	PCTK1	PCTAIRE protein kinase 1	8
TL16672	chrX:48715077-48743619:A	56850	GRIPAP1	GRIP1 associated protein 1	8
TL16728	chrX:53237377-53271329:A	8242	JARID1C	jumonji, AT rich interactive domain 1C	8
TL16890	chrX:102217405-102234678:A	56000	NXF3	nuclear RNA export factor 3	8
TL17133	chrX:152699703-152704381:S	26576	SRPK3	SFRS protein kinase 3	8
TL17216	chrY:20326688-20366212:A	8284	JARID1D	jumonji, AT rich interactive domain 1D	8
TL00015	chr1:1207438-1217272:S	6339	SCNN1D	sodium channel, nonvoltage-gated 1, delta	7
TL00081	chr1:6448738-6502656:A	57449	PLEKHG5	pleckstrin homology domain containing, family G (with RhoGef domain) member 5	7
TL00388	chr1:31965304-32002235:A	576	BAI2	brain-specific angiogenesis inhibitor 2	7
TL00830	chr1:100088227-100162167:S	178	AGL	amylo-1, 6-glucosidase, 4-alpha-glucanotransferase (glycogen debranching enzyme, glycogen storage disease type III)	7
TL00846	chr1:103114610-103346640:A	1301	COL11A1	collagen, type XI, alpha 1	7
TL01131	chr1:152168600-152185778:A	9909	DENND4B	DENN/MADD domain containing 4B	7
TL01172	chr1:153432002-153444314:A	7059	THBS3	thrombospondin 3	7
TL01184	chr1:153846630-153851382:S	55154	MSTO1	misato homolog 1 (Drosophila)	7
TL01654	chr1:220858066-220907974:S	375056	MIA3	melanoma inhibitory activity family, member 3	7
TL01942	chr10:37454790-37561501:S	91074	ANKRD30A	ankyrin repeat domain 30A	7
TL02462	chr10:134925910-134940362:A	101	ADAM8	ADAM metallopeptidase domain 8	7
TL02582	chr11:6581539-6588675:S	3611	ILK	integrin-linked kinase	7
TL02779	chr11:47309532-47330829:A	4607	MYBPC3	myosin binding protein C, cardiac	7
TL02895	chr11:62148873-62170680:A	23193	GANAB	glucosidase, alpha; neutral AB	7
TL02930	chr11:63435277-63440892:A	283248	RCOR2	REST corepressor 2	7
TL02997	chr11:65162170-65174965:S	6494	SIPA1	signal-induced proliferation-associated gene 1	7
TL03020	chr11:65781823-65791907:S	64837	KLC2	kinesin light chain 2	7
TL03036	chr11:66087510-66092623:A	8722	CTSF	cathepsin F	7
TL03041	chr11:66209298-66245446:A	6712	SPTBN2	spectrin, beta, non-erythrocytic 2	7
TL03050	chr11:66813394-66826530:S	338692	ANKRD13D	ankyrin repeat domain 13 family, member D	7
TL03076	chr11:67563058-67574942:S	10312	TCIRG1	T-cell, immune regulator 1, ATPase, H+ transporting, lysosomal V0 subunit A3	7
TL03379	chr11:118483302-118493037:S	9854	C2CD2L	C2CD2-like	7
TL03388	chr11:118716835-118722580:A	83552	MFRP	membrane frizzled-related protein	7
TL03530	chr12:6536297-6547741:A	4839	NOL1	nucleolar protein 1, 120kDa	7
TL03799	chr12:48303669-48324716:S	25766	PRPF40B	PRP40 pre-mRNA processing factor 40 homolog B (S. cerevisiae)	7
TL03972	chr12:55775459-55791428:A	6778	STAT6	signal transducer and activator of transcription 6, interleukin-4 induced	7
TL03983	chr12:56168117-56196700:S	4141	MARS	methionyl-tRNA synthetase	7
TL03991	chr12:56299959-56306201:S	65012	SLC26A10	solute carrier family 26, member 10	7
TL04129	chr12:94891272-94914202:A	3034	HAL	histidine ammonia-lyase	7
TL04381	chr12:131000460-131130958:S	57634	EP400	E1A binding protein p400	7
TL04385	chr12:131705475-131709045:S	22953	P2RX2	purinergic receptor P2X, ligand-gated ion channel, 2	7
TL04710	chr14:20608366-20627876:S	55701	FLJ10357	hypothetical protein FLJ10357	7
TL04746	chr14:22921038-22947322:A	4624	MYH6	myosin, heavy chain 6, cardiac muscle, alpha (cardiomyopathy, hypertrophic 1)	7
TL04762	chr14:23675217-23678016:S	5720	PSME1	proteasome (prosome, macropain) activator subunit 1 (PA28 alpha)	7
TL04775	chr14:23778689-23781720:A	26277	TINF2	TERF1 (TRF1)-interacting nuclear factor 2	7
TL04782	chr14:23857409-23873704:A	196883	ADCY4	adenylate cyclase 4	7
TL04801	chr14:30639074-30746440:A	25831	HECTD1	HECT domain containing 1	7
TL04855	chr14:49320281-49389289:A	9147	SDCCAG1	serologically defined colon cancer antigen 1	7
TL04941	chr14:63389435-63762920:S	23224	SYNE2	spectrin repeat containing, nuclear envelope 2	7
TL05258	chr15:32458561-32487180:A	23015	GOLGA8A	golgi autoantigen, golgin subfamily a, 8A	7
TL05259	chr15:32604591-32613203:A	440270	GOLGA8B	golgi autoantigen, golgin subfamily a, 8B	7
TL05678	chr15:88129129-88159076:A	290	ANPEP	alanyl (membrane) aminopeptidase (aminopeptidase N, aminopeptidase M, microsomal aminopeptidase, CD13, p150)	7
TL05743	chr16:258310-265915:A	8786	RGS11	regulator of G-protein signaling 11	7
TL05764	chr16:671667-674440:A	339123	LOC339123	hypothetical LOC339123	7
TL05827	chr16:2145799-2168131:S	84231	TRAF7	TNF receptor-associated factor 7	7
TL05887	chr16:4344543-4406640:A	79585	CORO7	coronin 7	7
TL06075	chr16:29892722-29911082:S	9344	TAOK2	TAO kinase 2	7
TL06131	chr16:31178788-31251714:S	3684	ITGAM	integrin, alpha M (complement component 3 receptor 3 subunit)	7
TL06300	chr16:66535730-66560026:A	6560	SLC12A4	solute carrier family 12 (potassium/chloride transporters), member 4	7
TL06555	chr17:4741839-4747148:A	1145	CHRNE	cholinergic receptor, nicotinic, epsilon	7
TL06660	chr17:8154314-8166554:S	22899	ARHGEF15	Rho guanine nucleotide exchange factor (GEF) 15	7
TL06737	chr17:18069660-18088913:S	3996	LLGL1	lethal giant larvae homolog 1 (Drosophila)	7
TL06819	chr17:24924612-24940736:A	28964	GIT1	G protein-coupled receptor kinase interactor 1	7
TL06940	chr17:35097918-35138441:S	2064	ERBB2	v-erb-b2 erythroblastic leukemia viral oncogene homolog 2, neuro/glioblastoma derived oncogene homolog (avian)	7
TL07032	chr17:38186221-38202610:S	65266	WNK4	WNK lysine deficient protein kinase 4	7
TL07064	chr17:39509646-39556540:A	10014	HDAC5	histone deacetylase 5	7
TL07074	chr17:39778016-39785996:S	2896	GRN	granulin	7
TL07096	chr17:40827057-40858780:A	201176	ARHGAP27	Rho GTPase activating protein 27	7
TL07254	chr17:58058493-58124684:S	9902	MRC2	mannose receptor, C type 2	7
TL07363	chr17:70964258-71008128:S	9772	KIAA0195	KIAA0195	7
TL07378	chr17:71418212-71448714:A	85302	FBF1	Fas (TNFRSF6) binding factor 1	7
TL07382	chr17:71514521-71535102:A	2125	EVPL	envoplakin	7
TL07460	chr17:77261424-77279552:S	9146	HGS	hepatocyte growth factor-regulated tyrosine kinase substrate	7
TL07504	chr17_random:2320462-2330382:S	2642	GCGR	glucagon receptor	7
TL07799	chr19:1432426-1441407:A	54760	PCSK4	proprotein convertase subtilisin/kexin type 4	7
TL07932	chr19:6680924-6688633:A	56927	GPR108	G protein-coupled receptor 108	7
TL07946	chr19:7505042-7532652:S	10908	PNPLA6	patatin-like phospholipase domain containing 6	7
TL07947	chr19:7566787-7589196:S	57662	KIAA1543	KIAA1543	7
TL07948	chr19:7590410-7600439:A	56949	XAB2	XPA binding protein 2	7
TL07958	chr19:7801242-7835862:S	115704	EVI5L	ecotropic viral integration site 5-like	7
TL08015	chr19:10322208-10352211:A	7297	TYK2	tyrosine kinase 2	7
TL08045	chr19:11366000-11391004:A	57139	RGL3	ral guanine nucleotide dissociation stimulator-like 3	7
TL08096	chr19:12894283-12905558:A	2193	FARSA	phenylalanyl-tRNA synthetase, alpha subunit	7
TL08103	chr19:13076714-13088332:A	55621	TRMT1	TRM1 tRNA methyltransferase 1 homolog (S. cerevisiae)	7
TL08116	chr19:13924318-13933256:S	90379	LOC90379	hypothetical protein BC002926	7
TL08123	chr19:14353212-14380535:S	976	CD97	CD97 molecule	7
TL08125	chr19:14405165-14443679:S	5585	PKN1	protein kinase N1	7
TL08129	chr19:14501381-14537792:S	9524	GPSN2	glycoprotein, synaptic 2	7
TL08228	chr19:18754582-18763114:A	1311	COMP	cartilage oligomeric matrix protein	7
TL08320	chr19:40183085-40209213:S	57655	GRAMD1A	GRAM domain containing 1A	7
TL08340	chr19:40732934-40746400:A	495	ATP4A	ATPase, H+/K+ exchanging, alpha polypeptide	7
TL08413	chr19:43591537-43608785:A	115727	RASGRP4	RAS guanyl releasing protein 4	7
TL08418	chr19:43912671-43926954:A	147968	CAPN12	calpain 12	7
TL08444	chr19:44595589-44610895:S	64857	PLEKHG2	pleckstrin homology domain containing, family G (with RhoGef domain) member 2	7
TL08510	chr19:47162573-47190222:A	478	ATP1A3	ATPase, Na+/K+ transporting, alpha 3 polypeptide	7
TL09120	chr2:27520743-27566075:A	26160	IFT172	intraflagellar transport 172 homolog (Chlamydomonas)	7
TL09222	chr2:47887562-47986318:A	80204	FBXO11	F-box protein 11	7
TL09359	chr2:74607282-74610482:A	550	AUP1	ancient ubiquitous protein 1	7
TL09966	chr2:219809746-219818375:A	79411	GLB1L	galactosidase, beta 1-like	7
TL10035	chr2:232951591-232955844:S	250	ALPP	alkaline phosphatase, placental (Regan isozyme)	7
TL10036	chr2:232979795-232983668:S	251	ALPPL2	alkaline phosphatase, placental-like 2	7
TL10037	chr2:233029076-233032987:S	248	ALPI	alkaline phosphatase, intestinal	7
TL10149	chr20:2587040-2592843:A	3420	IDH3B	isocitrate dehydrogenase 3 (NAD+) beta	7
TL10151	chr20:2722714-2729282:A	56265	CPXM1	carboxypeptidase X (M14 family), member 1	7
TL10452	chr20:43996723-44010069:S	63935	C20orf67	chromosome 20 open reading frame 67	7
TL10784	chr22:18081986-18092297:S	5413	SEPT5	septin 5	7
TL10806	chr22:19649433-19665649:S	150209	AIFM3	apoptosis-inducing factor, mitochondrion-associated, 3	7
TL10848	chr22:22907443-22915074:S	56241	SUSD2	sushi domain containing 2	7
TL11188	chr3:9933781-9950314:S	84818	IL17RC	interleukin 17 receptor C	7
TL11304	chr3:38023990-38046137:A	5333	PLCD1	phospholipase C, delta 1	7
TL11456	chr3:49733935-49736388:A	29925	GMPPB	GDP-mannose pyrophosphorylase B	7
TL11469	chr3:50217695-50233410:S	10991	SLC38A3	solute carrier family 38, member 3	7
TL11479	chr3:50353540-50358160:A	51364	ZMYND10	zinc finger, MYND-type containing 10	7
TL11502	chr3:51992602-51998258:S	95	ACY1	aminoacylase 1	7
TL11527	chr3:52822045-52839734:A	3700	ITIH4	inter-alpha (globulin) inhibitor H4 (plasma Kallikrein-sensitive glycoprotein)	7
TL11579	chr3:64476370-64648405:A	56999	ADAMTS9	ADAM metallopeptidase with thrombospondin type 1 motif, 9	7
TL11775	chr3:128190191-128238920:S	5361	PLXNA1	plexin A1	7
TL11805	chr3:130756745-130808272:A	23129	PLXND1	plexin D1	7
TL12154	chr4:1765420-1780396:S	2261	FGFR3	fibroblast growth factor receptor 3 (achondroplasia, thanatophoric dwarfism)	7
TL12168	chr4:2902092-2905567:A	10227	MFSD10	major facilitator superfamily domain containing 10	7
TL12251	chr4:24987945-25029218:S	29945	ANAPC4	anaphase promoting complex subunit 4	7
TL13480	chr5:176761744-176769183:A	2161	F12	coagulation factor XII (Hageman factor)	7
TL13512	chr5:179156710-179166547:A	11282	MGAT4B	mannosyl (alpha-1,3-)-glycoprotein beta-1,4-N-acetylglucosaminyltransferase, isozyme B	7
TL13713	chr6:31218194-31233994:A	54535	CCHCR1	coiled-coil alpha-helical rod protein 1	7
TL13733	chr6:31714783-31728456:A	7917	BAT3	HLA-B associated transcript 3	7
TL13758	chr6:32021751-32027839:S	629	CFB	complement factor B	7
TL13920	chr6:43060307-43088058:S	5528	PPP2R5D	protein phosphatase 2, regulatory subunit B', delta isoform	7
TL13951	chr6:44234525-44260117:S	11131	CAPN11	calpain 11	7
TL14735	chr7:75454242-75461889:A	83862	TMEM120A	transmembrane protein 120A	7
TL14864	chr7:99613473-99649946:S	10734	STAG3	stromal antigen 3	7
TL14891	chr7:100310670-100324221:S	51593	ARS2	arsenate resistance protein 2	7
TL15306	chr8:22518201-22533928:S	57805	KIAA1967	KIAA1967	7
TL15431	chr8:48848221-49035296:A	5591	PRKDC	protein kinase, DNA-activated, catalytic polypeptide	7
TL16120	chr9:100745958-100872889:S	1306	COL15A1	collagen, type XV, alpha 1	7
TL16683	chrX:48978884-48994341:S	28952	CCDC22	coiled-coil domain containing 22	7
TL16877	chrX:100973740-100999205:A	55998	NXF5	nuclear RNA export factor 5	7
TL17159	chrX:153325701-153332190:S	9130	FAM50A	family with sequence similarity 50, member A	7
TL00021	chr1:1260520-1274358:A	1855	DVL1	dishevelled, dsh homolog 1 (Drosophila)	6
TL00058	chr1:3394365-3517919:A	1953	MEGF6	multiple EGF-like-domains 6	6
TL00190	chr1:16140950-16175214:A	7709	ZBTB17	zinc finger and BTB domain containing 17	6
TL00277	chr1:23990232-23994616:S	11313	LYPLA2	lysophospholipase II	6
TL00536	chr1:43597212-43601460:S	991	CDC20	cell division cycle 20 homolog (S. cerevisiae)	6
TL00582	chr1:46426939-46436708:A	55624	POMGNT1	protein O-linked mannose beta1,2-N-acetylglucosaminyltransferase	6
TL00620	chr1:52588854-52604452:A	200014	CC2D1B	coiled-coil and C2 domain containing 1B	6
TL00740	chr1:78186178-78217365:A	8880	FUBP1	far upstream element (FUSE) binding protein 1	6
TL00793	chr1:91498910-91643014:A	164045	HFM1	HFM1, ATP-dependent DNA helicase homolog (S. cerevisiae)	6
TL00880	chr1:109963981-109976200:S	271	AMPD2	adenosine monophosphate deaminase 2 (isoform L)	6
TL00983	chr1:144149938-144153880:S	10628	TXNIP	thioredoxin interacting protein	6
TL01145	chr1:152564659-152590404:S	57198	ATP8B2	ATPase, class I, type 8B, member 2	6
TL01162	chr1:153272923-153290030:S	149095	DCST1	DC-STAMP domain containing 1	6
TL01211	chr1:154761820-154809020:A	128239	IQGAP3	IQ motif containing GTPase activating protein 3	6
TL01226	chr1:155077288-155095290:A	3645	INSRR	insulin receptor-related receptor	6
TL02076	chr10:72826696-73245711:S	64072	CDH23	cadherin-like 23	6
TL02239	chr10:99208070-99248257:A	64210	MMS19	MMS19 nucleotide excision repair homolog (S. cerevisiae)	6
TL02301	chr10:103995298-104132639:S	8729	GBF1	golgi-specific brefeldin A resistance factor 1	6
TL02305	chr10:104172991-104182413:A	79004	CUEDC2	CUE domain containing 2	6
TL02495	chr11:544856-550779:A	256329	C11orf35	chromosome 11 open reading frame 35	6
TL02498	chr11:602554-605999:A	3665	IRF7	interferon regulatory factor 7	6
TL02574	chr11:6372930-6397220:A	322	APBB1	amyloid beta (A4) precursor protein-binding, family B, member 1 (Fe65)	6
TL02862	chr11:60857229-60872807:S	26007	DAK	dihydroxyacetone kinase 2 homolog (S. cerevisiae)	6
TL02953	chr11:63883200-63896263:S	8986	RPS6KA4	ribosomal protein S6 kinase, 90kDa, polypeptide 4	6
TL02989	chr11:65049123-65062758:S	57410	SCYL1	SCY1-like 1 (S. cerevisiae)	6
TL03004	chr11:65384447-65390490:S	80198	MUS81	MUS81 endonuclease homolog (S. cerevisiae)	6
TL03035	chr11:66070966-66087373:S	89	ACTN3	actinin, alpha 3	6
TL03044	chr11:66372572-66482423:A	5091	PC	pyruvate carboxylase	6
TL03054	chr11:66915998-66922459:S	5883	RAD9A	RAD9 homolog A (S. pombe)	6
TL03441	chr11:125638043-125643960:A	6734	SRPR	signal recognition particle receptor ('docking protein')	6
TL03469	chr11:133527546-133599636:A	23310	NCAPD3	non-SMC condensin II complex, subunit D3	6
TL03740	chr12:42034278-42231991:A	80070	ADAMTS20	ADAM metallopeptidase with thrombospondin type 1 motif, 20	6
TL03752	chr12:45038237-45052814:A	54407	SLC38A2	solute carrier family 38, member 2	6
TL03758	chr12:46417292-46438952:A	10411	RAPGEF3	Rap guanine nucleotide exchange factor (GEF) 3	6
TL03879	chr12:51987506-52001648:A	8086	AAAS	achalasia, adrenocortical insufficiency, alacrimia (Allgrove, triple-A)	6
TL03945	chr12:54917857-54938410:A	283373	ANKRD52	ankyrin repeat domain 52	6
TL03951	chr12:55021648-55040176:A	6773	STAT2	signal transducer and activator of transcription 2, 113kDa	6
TL03969	chr12:55708567-55730160:A	4640	MYO1A	myosin IA	6
TL04254	chr12:112079360-112107667:A	79039	DDX54	DEAD (Asp-Glu-Ala-Asp) box polypeptide 54	6
TL04347	chr12:122346407-122400941:A	55206	SBNO1	strawberry notch homolog 1 (Drosophila)	6
TL04379	chr12:130945231-130973649:S	8408	ULK1	unc-51-like kinase 1 (C. elegans)	6
TL04382	chr12:131187092-131194833:A	317781	DDX51	DEAD (Asp-Glu-Ala-Asp) box polypeptide 51	6
TL04383	chr12:131194945-131202939:S	79050	NOC4L	nucleolar complex associated 4 homolog (S. cerevisiae)	6
TL04714	chr14:20889475-20922265:A	11198	SUPT16H	suppressor of Ty 16 homolog (S. cerevisiae)	6
TL05175	chr14:102458746-102467282:S	81693	AMN	amnionless homolog (mouse)	6
TL05176	chr14:102468468-102593495:A	9578	CDC42BPB	CDC42 binding protein kinase beta (DMPK-like)	6
TL05222	chr15:20986536-20999860:S	390535	GOLGA8E	golgi autoantigen, golgin subfamily a, 8E	6
TL05231	chr15:26297459-26308821:S	440321	FLJ32679	golgin-like hypothetical protein LOC440321	6
TL05232	chr15:26563797-26577158:A	283768	GOLGA8G	golgi autoantigen, golgin subfamily a, 8G	6
TL05315	chr15:39907574-39927638:S	100137047|100137049|8681	LOC100137047|LOC100137047-PLA2G4B|PLA2G4B	hypothetical protein LOC100137047|hypothetical protein LOC8681|phospholipase A2, group IVB (cytosolic)	6
TL05341	chr15:41612951-41664383:A	9677	HISPPD2A	histidine acid phosphatase domain containing 2A	6
TL05343	chr15:41679052-41698290:A	161497	STRC	stereocilin	6
TL05347	chr15:41852089-41856794:A	80237	ELL3	elongation factor RNA polymerase II-like 3	6
TL05535	chr15:70734091-70746791:S	55889	GOLGA6B	golgi autoantigen, golgin subfamily a, 6B	6
TL05548	chr15:72149250-72161944:A	342096	GOLGA6	golgi autoantigen, golgin subfamily a, 6	6
TL05669	chr15:87660552-87679030:A	5428	POLG	polymerase (DNA directed), gamma	6
TL05692	chr15:89212888-89227691:S	5045	FURIN	furin (paired basic amino acid cleaving enzyme)	6
TL05693	chr15:89228712-89240010:S	2242	FES	feline sarcoma oncogene	6
TL05752	chr16:517856-544637:S	6650	SOLH	small optic lobes homolog (Drosophila)	6
TL05765	chr16:674702-680401:A	84219	WDR24	WD repeat domain 24	6
TL05781	chr16:1143241-1211773:S	8912	CACNA1H	calcium channel, voltage-dependent, T type, alpha 1H subunit	6
TL06040	chr16:28396100-28411124:A	1201	CLN3	ceroid-lipofuscinosis, neuronal 3, juvenile (Batten, Spielmeyer-Vogt disease)	6
TL06050	chr16:28761232-28765230:A	7284	TUFM	Tu translation elongation factor, mitochondrial	6
TL06054	chr16:28850760-28858164:S	930	CD19	CD19 molecule	6
TL06065	chr16:29709558-29724207:S	3835	KIF22	kinesin family member 22	6
TL06078	chr16:29924335-29929902:A	8448	DOC2A	double C2-like domains, alpha	6
TL06123	chr16:31027248-31031422:S	10295	BCKDK	branched chain ketoacid dehydrogenase kinase	6
TL06137	chr16:31401939-31409592:S	6524	SLC5A2	solute carrier family 5 (sodium/glucose cotransporter), member 2	6
TL06291	chr16:66398510-66419472:S	55815	TSNAXIP1	translin-associated factor X interacting protein 1	6
TL06292	chr16:66419560-66438862:A	80152	CENPT	centromere protein T	6
TL06418	chr16:82782244-82788273:S	161931	ADAD2	adenosine deaminase domain containing 2	6
TL06554	chr17:4683350-4742135:S	50488	MINK1	misshapen-like kinase 1 (zebrafish)	6
TL06606	chr17:7125777-7132091:S	6517	SLC2A4	solute carrier family 2 (facilitated glucose transporter), member 4	6
TL06609	chr17:7156701-7159162:A	2874	GPS2	G protein pathway suppressor 2	6
TL06729	chr17:17656110-17681050:A	6720	SREBF1	sterol regulatory element binding transcription factor 1	6
TL06757	chr17:19255115-19261181:S	7732	ZNF179	zinc finger protein 179	6
TL06794	chr17:23924259-23928078:A	230	ALDOC	aldolase C, fructose-bisphosphate	6
TL06801	chr17:24065429-24069013:A	83871	RAB34	RAB34, member RAS oncogene family	6
TL06942	chr17:35147712-35157064:S	2886	GRB7	growth factor receptor-bound protein 7	6
TL07181	chr17:45979560-45988212:S	64847	SPATA20	spermatogenesis associated 20	6
TL07182	chr17:45993447-46059541:S	8913	CACNA1G	calcium channel, voltage-dependent, T type, alpha 1G subunit	6
TL07268	chr17:59258541-59263119:S	5705	PSMC5	proteasome (prosome, macropain) 26S subunit, ATPase, 5	6
TL07366	chr17:71033377-71082885:S	3993	LLGL2	lethal giant larvae homolog 2 (Drosophila)	6
TL07446	chr17:76777987-76811346:A	22994	AZI1	5-azacytidine induced 1	6
TL07452	chr17:76988134-77047953:S	57597	BAHCC1	BAH domain and coiled-coil containing 1	6
TL07478	chr17:77587045-77588862:A	51181	DCXR	dicarbonyl/L-xylulose reductase	6
TL07656	chr18:46049213-46062142:A	4152	MBD1	methyl-CpG binding domain protein 1	6
TL07657	chr18:46062710-46068690:A	30827	CXXC1	CXXC finger 1 (PHD domain)	6
TL07758	chr19:568222-584568:A	5442	POLRMT	polymerase (RNA) mitochondrial (DNA directed)	6
TL07765	chr19:748410-763327:S	5725	PTBP1	polypyrimidine tract binding protein 1	6
TL07860	chr19:3701770-3712673:A	9546	APBA3	amyloid beta (A4) precursor protein-binding, family A, member 3 (X11-like 2)	6
TL07897	chr19:5156518-5291814:A	5802	PTPRS	protein tyrosine phosphatase, receptor type, S	6
TL07960	chr19:7874764-7885363:S	5609	MAP2K7	mitogen-activated protein kinase kinase 7	6
TL07976	chr19:8460939-8473495:A	84106	PRAM1	PML-RARA regulated adaptor molecule 1	6
TL07978	chr19:8491996-8548307:A	4542	MYO1F	myosin IF	6
TL08003	chr19:10077964-10087064:S	5032|56342|692312	P2RY11|PPAN|PPAN-P2RY11	PPAN-P2RY11|peter pan homolog (Drosophila)|purinergic receptor P2Y, G-protein coupled, 11	6
TL08004	chr19:10086689-10091599:A	8666	EIF3G	eukaryotic translation initiation factor 3, subunit G	6
TL08078	chr19:12618321-12638828:A	4125	MAN2B1	mannosidase, alpha, class 2B, member 1	6
TL08082	chr19:12660729-12668455:A	84261	FBXW9	F-box and WD repeat domain containing 9	6
TL08117	chr19:13933351-13978097:A	5989	RFX1	regulatory factor X, 1 (influences HLA class II expression)	6
TL08146	chr19:15423437-15436382:A	64926	FLJ21438	hypothetical protein FLJ21438	6
TL08367	chr19:41237622-41287852:S	284403	WDR62	WD repeat domain 62	6
TL08427	chr19:44097746-44113376:A	54938	SARS2	seryl-tRNA synthetase 2, mitochondrial	6
TL08472	chr19:45774629-45789141:S	92799	SHKBP1	SH3KBP1 binding protein 1	6
TL08473	chr19:45794980-45827565:S	8425	LTBP4	latent transforming growth factor beta binding protein 4	6
TL08738	chr19:55013357-55032049:S	81857	MED25	mediator complex subunit 25	6
TL08739	chr19:55046227-55055811:S	53635	PTOV1	prostate tumor overexpressed gene 1	6
TL08742	chr19:55072640-55083813:S	79735	TBC1D17	TBC1 domain family, member 17	6
TL08849	chr19:59333260-59351239:S	4849	CNOT3	CCR4-NOT transcription complex, subunit 3	6
TL09115	chr2:27446892-27453498:S	9784	SNX17	sorting nexin 17	6
TL09432	chr2:96051420-96064454:A	150763	LOC150763	hypothetical protein LOC150763	6
TL09459	chr2:97739232-97978786:A	23505	TMEM131	transmembrane protein 131	6
TL09598	chr2:130816958-130820667:S	92856	IMP4	IMP4, U3 small nucleolar ribonucleoprotein, homolog (yeast)	6
TL09734	chr2:173000559-173079427:S	3655	ITGA6	integrin, alpha 6	6
TL09760	chr2:177785667-177796931:S	220988	HNRNPA3	heterogeneous nuclear ribonucleoprotein A3	6
TL10451	chr20:43960803-43974193:A	5360	PLTP	phospholipid transfer protein	6
TL10917	chr22:29652599-29694187:A	22880	MORC2	MORC family CW-type zinc finger 2	6
TL10918	chr22:29807304-29830609:S	6525	SMTN	smoothelin	6
TL11038	chr22:39096540-39136239:S	27352	SGSM3	small G protein signaling modulator 3	6
TL11148	chr22:49410314-49413473:A	410	ARSA	arylsulfatase A	6
TL11424	chr3:48638159-48647930:A	65010	SLC26A6	solute carrier family 26, member 6	6
TL11480	chr3:50359922-50363490:A	10641	TUSC4	tumor suppressor candidate 4	6
TL11497	chr3:51942485-51950962:A	9136	RRP9	ribosomal RNA processing 9, small subunit (SSU) processome component, homolog (yeast)	6
TL12040	chr3:185762280-185782890:S	2049	EPHB3	EPH receptor B3	6
TL12141	chr4:942674-957344:A	1609	DGKQ	diacylglycerol kinase, theta 110kDa	6
TL12143	chr4:970784-988317:S	3425	IDUA	iduronidase, alpha-L-	6
TL12543	chr4:104246411-104339015:A	1062	CENPE	centromere protein E, 312kDa	6
TL13028	chr5:74668854-74693681:S	3156	HMGCR	3-hydroxy-3-methylglutaryl-Coenzyme A reductase	6
TL13245	chr5:137551235-137576931:A	8697	CDC23	cell division cycle 23 homolog (S. cerevisiae)	6
TL13474	chr5:176660804-176663350:A	53917	RAB24	RAB24, member RAS oncogene family	6
TL13479	chr5:176744040-176758455:S	6569	SLC34A1	solute carrier family 34 (sodium phosphate), member 1	6
TL13481	chr5:176786292-176802456:S	2870	GRK6	G protein-coupled receptor kinase 6	6
TL13522	chr5:179961111-180009206:A	2324	FLT4	fms-related tyrosine kinase 4	6
TL13696	chr6:30728885-30748736:A	8449	DHX16	DEAH (Asp-Glu-Ala-His) box polypeptide 16	6
TL13699	chr6:30775562-30793437:A	9656	MDC1	mediator of DNA damage checkpoint 1	6
TL13764	chr6:32114060-32117398:S	1589	CYP21A2	cytochrome P450, family 21, subfamily A, polypeptide 2	6
TL13773	chr6:32256723-32260001:A	177	AGER	advanced glycosylation end product-specific receptor	6
TL13776	chr6:32270597-32299822:A	4855	NOTCH4	Notch homolog 4 (Drosophila)	6
TL13919	chr6:43039723-43054866:A	5190	PEX6	peroxisomal biogenesis factor 6	6
TL14019	chr6:56430743-56816422:A	667	DST	dystonin	6
TL14695	chr7:72056767-72063222:A	260294	NSUN5C	NOL1/NOP2/Sun domain family, member 5C	6
TL14861	chr7:99589978-99594238:A	55262	C7orf43	chromosome 7 open reading frame 43	6
TL14887	chr7:100169184-100233355:S	7455	ZAN	zonadhesin	6
TL14910	chr7:101892394-101900617:S	222229	LRWD1	leucine-rich repeats and WD repeat domain containing 1	6
TL15157	chr7:150376537-150380776:S	9311	ACCN3	amiloride-sensitive cation channel 3	6
TL15158	chr7:150381831-150385929:A	1020	CDK5	cyclin-dependent kinase 5	6
TL15465	chr8:59658617-59734940:A	8439	NSMAF	neutral sphingomyelinase (N-SMase) activation associated factor	6
TL15750	chr8:144728097-144731636:A	93100	NAPRT1	nicotinate phosphoribosyltransferase domain containing 1	6
TL15759	chr8:144970534-144983525:A	22827	PUF60	poly-U binding splicing factor 60KDa	6
TL15769	chr8:145225523-145231128:A	81858	SHARPIN	SHANK-associated RH domain interactor	6
TL15776	chr8:145486077-145509193:S	3297	HSF1	heat shock transcription factor 1	6
TL15940	chr9:35722316-35727005:S	10488	CREB3	cAMP responsive element binding protein 3	6
TL16276	chr9:129604974-129616377:S	2356	FPGS	folylpolyglutamate synthase	6
TL16384	chr9:136673472-136876509:S	1289	COL5A1	collagen, type V, alpha 1	6
TL16450	chr9:139245205-139250827:S	142680	SLC34A3	solute carrier family 34 (sodium phosphate), member 3	6
TL16634	chrX:47305521-47316264:S	369	ARAF	v-raf murine sarcoma 3611 viral oncogene homolog	6
TL16676	chrX:48819035-48845003:A	11152	WDR45	WD repeat domain 45	6
TL16733	chrX:53576475-53697776:A	10075	HUWE1	HECT, UBA and WWE domain containing 1	6
TL16793	chrX:70255130-70279029:S	9968	MED12	mediator complex subunit 12	6
TL17128	chrX:152588416-152592974:A	139728	PNCK	pregnancy upregulated non-ubiquitously expressed CaM kinase	6
TL17129	chrX:152606585-152615234:S	6535	SLC6A8	solute carrier family 6 (neurotransmitter transporter, creatine), member 8	6
TL00002	chr1:869445-884542:A	26155	NOC2L	nucleolar complex associated 2 homolog (S. cerevisiae)	5
TL00020	chr1:1256588-1259707:S	83756	TAS1R3	taste receptor, type 1, member 3	5
TL00022	chr1:1277933-1283778:A	54587	MXRA8	matrix-remodelling associated 8	5
TL00033	chr1:1557422-1559893:S	8510	MMP23B	matrix metallopeptidase 23B	5
TL00034	chr1:1560962-1645651:A	728642|984	CDC2L1|CDC2L2	cell division cycle 2-like 1 (PITSLRE proteins)|cell division cycle 2-like 2 (PITSLRE proteins)	5
TL00071	chr1:6084439-6162770:A	26038	CHD5	chromodomain helicase DNA binding protein 5	5
TL00073	chr1:6188775-6203946:S	388591	RNF207	ring finger protein 207	5
TL00107	chr1:9634376-9711759:S	5293	PIK3CD	phosphoinositide-3-kinase, catalytic, delta polypeptide	5
TL00408	chr1:32889410-32918841:S	5928	RBBP4	retinoblastoma binding protein 4	5
TL00450	chr1:36394389-36419028:S	55700	MAP7D1	MAP7 domain containing 1	5
TL00534	chr1:43539250-43561366:S	7075	TIE1	tyrosine kinase with immunoglobulin-like and EGF-like domains 1	5
TL00542	chr1:43769133-43861930:S	5792	PTPRF	protein tyrosine phosphatase, receptor type, F	5
TL00551	chr1:44234741-44269721:A	6536	SLC6A9	solute carrier family 6 (neurotransmitter transporter, glycine), member 9	5
TL00557	chr1:44978076-45006025:S	11004	KIF2C	kinesin family member 2C	5
TL00575	chr1:45858302-45862316:A	149483	CCDC17	coiled-coil domain containing 17	5
TL00767	chr1:85967503-86394709:A	255631	COL24A1	collagen, type XXIV, alpha 1	5
TL00816	chr1:94656598-94756672:S	5825	ABCD3	ATP-binding cassette, sub-family D (ALD), member 3	5
TL01058	chr1:149521414-149531005:S	57592	ZNF687	zinc finger protein 687	5
TL01175	chr1:153483619-153491898:A	10712	C1orf2	chromosome 1 open reading frame 2	5
TL01459	chr1:184547408-184611080:A	7175	TPR	translocated promoter region (to activated MET oncogene)	5
TL01482	chr1:195319996-195382287:A	259266	ASPM	asp (abnormal spindle) homolog, microcephaly associated (Drosophila)	5
TL01497	chr1:199205142-199259451:A	23046	KIF21B	kinesin family member 21B	5
TL01590	chr1:205736095-205881733:S	1378	CR1	complement component (3b/4b) receptor 1 (Knops blood group)	5
TL01695	chr1:226355050-226357645:A	79169	C1orf35	chromosome 1 open reading frame 35	5
TL01706	chr1:227633615-227636466:A	58	ACTA1	actin, alpha 1, skeletal muscle	5
TL02101	chr10:75174137-75201925:S	9632	SEC24C	SEC24 related gene family, member C (S. cerevisiae)	5
TL02201	chr10:95056175-95232029:A	26509	FER1L3	fer-1-like 3, myoferlin (C. elegans)	5
TL02235	chr10:99106447-99151055:A	23223	RRP12	ribosomal RNA processing 12 homolog (S. cerevisiae)	5
TL02277	chr10:102722275-102735362:S	57715	SEMA4G	sema domain, immunoglobulin domain (Ig), transmembrane domain (TM) and short cytoplasmic domain, (semaphorin) 4G	5
TL02459	chr10:134823960-134889906:S	85442	KNDC1	kinase non-catalytic C-lobe domain (KIND) containing 1	5
TL02482	chr11:280693-285412:S	80162	ATHL1	ATH1, acid trehalase-like 1 (yeast)	5
TL02508	chr11:780474-786221:A	79751	SLC25A22	solute carrier family 25 (mitochondrial carrier: glutamate), member 22	5
TL02524	chr11:1812249-1815326:S	90019	SYT8	synaptotagmin VIII	5
TL02759	chr11:45899771-45907223:S	120071	GYLTL1B	glycosyltransferase-like 1B	5
TL02770	chr11:46721659-46824419:A	9793	CKAP5	cytoskeleton associated protein 5	5
TL02773	chr11:47142427-47154995:A	84364	ARFGAP2	ADP-ribosylation factor GTPase activating protein 2	5
TL02891	chr11:62117250-62125879:A	9219	MTA2	metastasis associated 1 family, member 2	5
TL02900	chr11:62200547-62203103:A	51035	LOC51035	SAPK substrate protein 1	5
TL02913	chr11:62356959-62364204:A	54663	WDR74	WD repeat domain 74	5
TL02937	chr11:63730781-63747939:S	83706	FERMT3	fermitin family homolog 3 (Drosophila)	5
TL02958	chr11:64270436-64284763:A	5837	PYGM	phosphorylase, glycogen; muscle (McArdle syndrome, glycogen storage disease type V)	5
TL02981	chr11:64705918-64736052:S	823	CAPN1	calpain 1, (mu/I) large subunit	5
TL03006	chr11:65403859-65407788:S	1521	CTSW	cathepsin W	5
TL03051	chr11:66827576-66836647:S	54961	SSH3	slingshot homolog 3 (Drosophila)	5
TL03106	chr11:71391558-71469221:A	4926	NUMA1	nuclear mitotic apparatus protein 1	5
TL03116	chr11:71964832-72063060:A	5138	PDE2A	phosphodiesterase 2A, cGMP-stimulated	5
TL03117	chr11:72073761-72115821:A	116985	CENTD2	centaurin, delta 2	5
TL03215	chr11:93034463-93103170:S	85459	KIAA1731	KIAA1731	5
TL03256	chr11:102485369-102855801:S	79659	DYNC2H1	dynein, cytoplasmic 2, heavy chain 1	5
TL03279	chr11:107598768-107745036:S	472	ATM	ataxia telangiectasia mutated	5
TL03337	chr11:116555148-116573371:S	51092	SIDT2	SID1 transmembrane family, member 2	5
TL03365	chr11:118034151-118055591:A	11181	TREH	trehalase (brush-border membrane glycoprotein)	5
TL03376	chr11:118443702-118457898:S	55823	VPS11	vacuolar protein sorting 11 homolog (S. cerevisiae)	5
TL03421	chr11:124240491-124256572:S	64221	ROBO3	roundabout, axon guidance receptor, homolog 3 (Drosophila)	5
TL03422	chr11:124259323-124272951:A	54538	ROBO4	roundabout homolog 4, magic roundabout (Drosophila)	5
TL03528	chr12:6513917-6517797:S	2597	GAPDH	glyceraldehyde-3-phosphate dehydrogenase	5
TL03553	chr12:6926000-6940740:S	5777	PTPN6	protein tyrosine phosphatase, non-receptor type 6	5
TL03749	chr12:44409886-44588086:S	196528	ARID2	AT rich interactive domain 2 (ARID, RFX-like)	5
TL03783	chr12:47682321-47698859:A	5571	PRKAG1	protein kinase, AMP-activated, gamma 1 non-catalytic subunit	5
TL03787	chr12:47777189-47790947:A	55716	LMBR1L	limb region 1 homolog (mouse)-like	5
TL03876	chr12:51948349-51973694:S	9700	ESPL1	extra spindle pole bodies homolog 1 (S. cerevisiae)	5
TL03934	chr12:54760158-54783395:S	2065	ERBB3	v-erb-b2 erythroblastic leukemia viral oncogene homolog 3 (avian)	5
TL03941	chr12:54843393-54869544:A	6601	SMARCC2	SWI/SNF related, matrix associated, actin dependent regulator of chromatin, subfamily c, member 2	5
TL03956	chr12:55151002-55168448:A	27165	GLS2	glutaminase 2 (liver, mitochondrial)	5
TL03990	chr12:56290229-56297293:S	115557	GEFT	RhoA/RAC/CDC42 exchange factor	5
TL04002	chr12:56477709-56496119:A	10677	AVIL	advillin	5
TL04054	chr12:70289648-70344016:A	196441	CCDC131	coiled-coil domain containing 131	5
TL04151	chr12:100198035-100304528:S	27340	UTP20	UTP20, small subunit (SSU) processome component, homolog (yeast)	5
TL04206	chr12:108061584-108190413:S	32	ACACB	acetyl-Coenzyme A carboxylase beta	5
TL04245	chr12:111082493-111228421:A	283450	C12orf51	chromosome 12 open reading frame 51	5
TL04343	chr12:122033979-122160928:A	57605	PITPNM2	phosphatidylinositol transfer protein, membrane-associated 2	5
TL04619	chr13:97403929-97474551:S	3843	IPO5	importin 5	5
TL04624	chr13:98243744-98536661:A	23348	DOCK9	dedicator of cytokinesis 9	5
TL04634	chr13:100504130-100866814:A	259232	NALCN	sodium leak channel, non-selective	5
TL04654	chr13:109757631-109963374:S	1284	COL4A2	collagen, type IV, alpha 2	5
TL04715	chr14:20923197-20975244:A	57680	CHD8	chromodomain helicase DNA binding protein 8	5
TL04728	chr14:22439693-22458236:A	55147	RBM23	RNA binding motif protein 23	5
TL04757	chr14:23610595-23617136:S	9362	CPNE6	copine VI (neuronal)	5
TL04776	chr14:23788159-23802256:A	7051	TGM1	transglutaminase 1 (K polypeptide epidermal type I, protein-glutamine-gamma-glutamyltransferase)	5
TL04777	chr14:23804583-23810643:A	5875	RABGGTA	Rab geranylgeranyltransferase, alpha subunit	5
TL05215	chr15:18848557-18971443:A	283755	LOC283755	hypothetical protein LOC283755	5
TL05311	chr15:39596666-39623756:A	26015	RPAP1	RNA polymerase II associated protein 1	5
TL05328	chr15:40803051-40816709:A	146059	CDAN1	congenital dyserythropoietic anemia, type I	5
TL05375	chr15:45797977-45853712:S	80031	SEMA6D	sema domain, transmembrane domain (TM), and cytoplasmic domain, (semaphorin) 6D	5
TL05424	chr15:53906413-54073127:A	4734	NEDD4	neural precursor cell expressed, developmentally down-regulated 4	5
TL05428	chr15:54709665-54813079:A	54816	ZNF280D	zinc finger protein 280D	5
TL05561	chr15:72861767-72882558:S	1445	CSK	c-src tyrosine kinase	5
TL05564	chr15:72915511-72922605:A	25989	ULK3	unc-51-like kinase 3 (C. elegans)	5
TL05772	chr16:751133-758866:S	10232	MSLN	mesothelin	5
TL05773	chr16:759428-772927:A	401827	MPFL	MPF-like	5
TL05824	chr16:2037990-2078714:S	7249	TSC2	tuberous sclerosis 2	5
TL05826	chr16:2138651-2144142:S	25837	RAB26	RAB26, member RAS oncogene family	5
TL05829	chr16:2195450-2199419:S	64223	GBL	G protein beta subunit-like	5
TL05832	chr16:2213567-2225744:S	1877	E4F1	E4F transcription factor 1	5
TL05955	chr16:15704492-15858388:A	4629	MYH11	myosin, heavy chain 11, smooth muscle	5
TL06052	chr16:28797309-28823331:S	487	ATP2A1	ATPase, Ca++ transporting, cardiac muscle, fast twitch 1	5
TL06057	chr16:28903647-28909605:S	27040	LAT	linker for activation of T cells	5
TL06076	chr16:29911816-29914888:A	8479	HIRIP3	HIRA interacting protein 3	5
TL06083	chr16:30004582-30010709:A	6911	TBX6	T-box 6	5
TL06087	chr16:30102426-30107898:S	11151	CORO1A	coronin, actin binding protein, 1A	5
TL06104	chr16:30569741-30575235:S	78994	PRR14	proline rich 14	5
TL06118	chr16:30952403-30958986:S	6810	STX4	syntaxin 4	5
TL06124	chr16:31036487-31050206:S	84148	MYST1	MYST histone acetyltransferase 1	5
TL06204	chr16:55580910-55674937:S	84166	NLRC5	NLR family, CARD domain containing 5	5
TL06222	chr16:56327160-56348663:S	10300	KATNB1	katanin p80 (WD repeat containing) subunit B 1	5
TL06234	chr16:57055117-57105024:S	65009	NDRG4	NDRG family member 4	5
TL06297	chr16:66520973-66523266:A	1506	CTRL	chymotrypsin-like	5
TL06371	chr16:73703258-73708166:A	197257	LDHD	lactate dehydrogenase D	5
TL06421	chr16:82959633-83055294:S	9914	ATP2C2	ATPase, Ca++ transporting, type 2C, member 2	5
TL06467	chr16:88214500-88232338:S	1800	DPEP1	dipeptidase 1 (renal)	5
TL06474	chr16:88331459-88410566:A	2175	FANCA	Fanconi anemia, complementation group A	5
TL06557	chr17:4781348-4784063:A	8402	SLC25A11	solute carrier family 25 (mitochondrial carrier; oxoglutarate carrier), member 11	5
TL06558	chr17:4784374-4789262:S	26001	RNF167	ring finger protein 167	5
TL06597	chr17:7017474-7023386:A	432	ASGR1	asialoglycoprotein receptor 1	5
TL06613	chr17:7225088-7233816:S	8711	TNK1	tyrosine kinase, non-receptor, 1	5
TL06644	chr17:7766751-7773478:A	9196	KCNAB3	potassium voltage-gated channel, shaker-related subfamily, beta member 3	5
TL06692	chr17:12836426-12862084:A	60528	ELAC2	elaC homolog 2 (E. coli)	5
TL06799	chr17:24013428-24053376:S	6830	SUPT6H	suppressor of Ty 6 homolog (S. cerevisiae)	5
TL07015	chr17:37718868-37794039:A	6774	STAT3	signal transducer and activator of transcription 3 (acute-phase response factor)	5
TL07020	chr17:37967617-37971821:S	80347	COASY	Coenzyme A synthase	5
TL07028	chr17:38088157-38105358:S	8506	CNTNAP1	contactin associated protein 1	5
TL07165	chr17:45488729-45522843:S	3675	ITGA3	integrin, alpha 3 (antigen CD49C, alpha 3 subunit of VLA-3 receptor)	5
TL07183	chr17:46067226-46124062:S	8714	ABCC3	ATP-binding cassette, sub-family C (CFTR/MRP), member 3	5
TL07233	chr17:55051831-55129099:S	1213	CLTC	clathrin, heavy chain (Hc)	5
TL07269	chr17:59263172-59274083:A	6603	SMARCD2	SWI/SNF related, matrix associated, actin dependent regulator of chromatin, subfamily d, member 2	5
TL07282	chr17:59926199-59932869:A	1655	DDX5	DEAD (Asp-Glu-Ala-Asp) box polypeptide 5	5
TL07385	chr17:71586903-71590342:S	353174	ZACN	zinc activated ligand-gated ion channel	5
TL07418	chr17:73931370-74082734:A	8632	DNAH17	dynein, axonemal, heavy chain 17	5
TL07470	chr17:77463106-77469332:A	51547	SIRT7	sirtuin (silent mating type information regulation 2 homolog) 7 (S. cerevisiae)	5
TL07476	chr17:77574568-77582316:S	201255	LRRC45	leucine rich repeat containing 45	5
TL07480	chr17:77603051-77608635:S	2873	GPS1	G protein pathway suppressor 1	5
TL07577	chr18:19523559-19789027:S	3909	LAMA3	laminin, alpha 3	5
TL07807	chr19:1733073-1763270:A	148229	ATP8B3	ATPase, class I, type 8B, member 3	5
TL07815	chr19:1988469-2002243:A	2872	MKNK2	MAP kinase interacting serine/threonine kinase 2	5
TL07863	chr19:3728966-3752810:A	4145	MATK	megakaryocyte-associated tyrosine kinase	5
TL07874	chr19:4134350-4175811:S	170961	ANKRD24	ankyrin repeat domain 24	5
TL07921	chr19:6330579-6344291:A	2962	GTF2F1	general transcription factor IIF, polypeptide 1, 74kDa	5
TL07933	chr19:6690706-6702529:S	9322	TRIP10	thyroid hormone receptor interactor 10	5
TL07935	chr19:6723721-6808371:S	7409	VAV1	vav 1 guanine nucleotide exchange factor	5
TL07950	chr19:7608020-7618697:S	6813	STXBP2	syntaxin binding protein 2	5
TL08007	chr19:10223639-10231736:S	51073	MRPL4	mitochondrial ribosomal protein L4	5
TL08026	chr19:10673130-10685040:S	81890	QTRT1	queuine tRNA-ribosyltransferase 1 (tRNA-guanine transglycosylase)	5
TL08030	chr19:10894443-10900357:A	78992	YIPF2	Yip1 domain family, member 2	5
TL08079	chr19:12638627-12647646:S	84292	MORG1	mitogen-activated protein kinase organizer 1	5
TL08119	chr19:14003261-14025026:S	9466	IL27RA	interleukin 27 receptor, alpha	5
TL08142	chr19:15209300-15252262:A	23476	BRD4	bromodomain containing 4	5
TL08172	chr19:16864761-16998625:A	27151	CPAMD8	C3 and PZP-like, alpha-2-macroglobulin domain containing 8	5
TL08207	chr19:18125015-18142343:S	5296	PIK3R2	phosphoinositide-3-kinase, regulatory subunit 2 (beta)	5
TL08237	chr19:19091429-19110267:A	54929	TMEM161A	transmembrane protein 161A	5
TL08310	chr19:39547908-39583076:S	2821	GPI	glucose phosphate isomerase	5
TL08339	chr19:40728384-40730268:S	10430	TMEM147	transmembrane protein 147	5
TL08425	chr19:44061039-44082201:A	22933	SIRT2	sirtuin (silent mating type information regulation 2 homolog) 2 (S. cerevisiae)	5
TL08431	chr19:44266784-44293318:S	390928	FLJ16165	purple acid phosphatase long form	5
TL08456	chr19:45168912-45179193:S	5704	PSMC4	proteasome (prosome, macropain) 26S subunit, ATPase, 4	5
TL08471	chr19:45664965-45774205:S	57731	SPTBN4	spectrin, beta, non-erythrocytic 4	5
TL08475	chr19:45889273-45914440:A	79934	ADCK4	aarF domain containing kinase 4	5
TL08579	chr19:50004177-50016518:S	4059	BCAM	basal cell adhesion molecule (Lutheran blood group)	5
TL08598	chr19:50574736-50600129:A	10848	PPP1R13L	protein phosphatase 1, regulatory (inhibitor) subunit 13 like	5
TL08604	chr19:50702527-50722080:S	7408	VASP	vasodilator-stimulated phosphoprotein	5
TL08708	chr19:54314474-54346092:S	8541	PPFIA3	protein tyrosine phosphatase, receptor type, f polypeptide (PTPRF), interacting protein (liprin), alpha 3	5
TL08745	chr19:55144061-55156241:A	114132	SIGLEC11	sialic acid binding Ig-like lectin 11	5
TL08755	chr19:55627971-55661395:S	4606	MYBPC2	myosin binding protein C, fast type	5
TL08764	chr19:55985483-55990293:S	93650	ACPT	acid phosphatase, testicular	5
TL08791	chr19:56605086-56613263:A	89790	SIGLEC10	sialic acid binding Ig-like lectin 10	5
TL08882	chr19:60279032-60291103:S	54869	EPS8L1	EPS8-like 1	5
TL09354	chr2:74563723-74575191:S	64427	TTC31	tetratricopeptide repeat domain 31	5
TL09361	chr2:74613453-74634570:A	84695	LOXL3	lysyl oxidase-like 3	5
TL09997	chr2:225338050-225615574:A	55619	DOCK10	dedicator of cytokinesis 10	5
TL10038	chr2:233052780-233060776:A	9427	ECEL1	endothelin converting enzyme-like 1	5
TL10063	chr2:237897400-237987559:A	1293	COL6A3	collagen, type VI, alpha 3	5
TL10150	chr20:2621523-2688754:S	57593	EBF4	early B-cell factor 4	5
TL10172	chr20:3724400-3734761:S	994	CDC25B	cell division cycle 25 homolog B (S. pombe)	5
TL10344	chr20:33593191-33608819:S	51614	ERGIC3	ERGIC and golgi 3	5
TL10470	chr20:46971681-47086637:S	10564	ARFGEF2	ADP-ribosylation factor guanine nucleotide-exchange factor 2 (brefeldin A-inhibited)	5
TL10523	chr20:56848189-56919645:S	2778	GNAS	GNAS complex locus	5
TL10532	chr20:57872012-57940604:A	10388	SYCP2	synaptonemal complex protein 2	5
TL10556	chr20:60918858-60942956:S	1299	COL9A3	collagen, type IX, alpha 3	5
TL10585	chr20:62058498-62071662:A	57473	ZNF512B	zinc finger protein 512B	5
TL10793	chr22:18479397-18484768:A	27037	HTF9C	HpaII tiny fragments locus 9C	5
TL10802	chr22:19391978-19543070:A	5297	PI4KA	phosphatidylinositol 4-kinase, catalytic, alpha	5
TL10809	chr22:19699463-19712302:S	9127	P2RX6	purinergic receptor P2X, ligand-gated ion channel, 6	5
TL11134	chr22:49033457-49042216:A	6300	MAPK12	mitogen-activated protein kinase 12	5
TL11135	chr22:49044268-49050906:A	5600	MAPK11	mitogen-activated protein kinase 11	5
TL11140	chr22:49272078-49275616:S	55586	MIOX	myo-inositol oxygenase	5
TL11177	chr3:9720509-9746592:S	151835	CPNE9	copine family member IX	5
TL11187	chr3:9919302-9933084:S	132014	IL17RE	interleukin 17 receptor E	5
TL11263	chr3:25614478-25680792:A	7155	TOP2B	topoisomerase (DNA) II beta 180kDa	5
TL11305	chr3:38055699-38139232:S	9940	DLEC1	deleted in lung and esophageal cancer 1	5
TL11319	chr3:39124155-39155398:S	199223	TTC21A	tetratricopeptide repeat domain 21A	5
TL11401	chr3:47430187-47492449:A	22937	SCAP	SREBF chaperone	5
TL11425	chr3:48648899-48675352:A	1951	CELSR3	cadherin, EGF LAG seven-pass G-type receptor 3 (flamingo homolog, Drosophila)	5
TL11499	chr3:51966513-51976509:A	57060	PCBP4	poly(rC) binding protein 4	5
TL11513	chr3:52410064-52419049:A	8314	BAP1	BRCA1 associated protein-1 (ubiquitin carboxy-terminal hydrolase)	5
TL11521	chr3:52694975-52703550:S	26354	GNL3	guanine nucleotide binding protein-like 3 (nucleolar)	5
TL11777	chr3:128774604-128781970:A	131601	GPR175	G protein-coupled receptor 175	5
TL11780	chr3:128874470-128882453:S	80325	ABTB1	ankyrin repeat and BTB (POZ) domain containing 1	5
TL11808	chr3:131547048-131686378:S	256076	COL29A1	collagen, type XXIX, alpha 1	5
TL11873	chr3:143508138-143649543:A	54464	XRN1	5'-3' exoribonuclease 1	5
TL11957	chr3:166179379-166278976:A	6476	SI	sucrase-isomaltase (alpha-glucosidase)	5
TL12583	chr4:113777568-113798191:S	51574	LARP7	La ribonucleoprotein domain family, member 7	5
TL12772	chr4:184817439-184871739:S	60684	C4orf41	chromosome 4 open reading frame 41	5
TL12962	chr5:57785566-57791670:A	10769	PLK2	polo-like kinase 2 (Drosophila)	5
TL13094	chr5:94825877-94916438:A	9652	KIAA0372	KIAA0372	5
TL13279	chr5:140024567-140030737:S	54853	WDR55	WD repeat domain 55	5
TL13339	chr5:149413050-149473128:A	1436	CSF1R	colony stimulating factor 1 receptor, formerly McDonough feline sarcoma viral (v-fms) oncogene homolog	5
TL13484	chr5:176843000-176857208:A	9260	PDLIM7	PDZ and LIM domain 7 (enigma)	5
TL13581	chr6:10995049-11082527:S	221711	SYCP2L	synaptonemal complex protein 2-like	5
TL13692	chr6:30676160-30692999:A	5514	PPP1R10	protein phosphatase 1, regulatory (inhibitor) subunit 10	5
TL13694	chr6:30702631-30722577:S	79969	C6orf134	chromosome 6 open reading frame 134	5
TL13703	chr6:30959839-30975912:S	780	DDR1	discoidin domain receptor tyrosine kinase 1	5
TL13739	chr6:31762714-31779067:A	7920	BAT5	HLA-B associated transcript 5	5
TL13748	chr6:31841349-31853087:A	80737	C6orf27	chromosome 6 open reading frame 27	5
TL13766	chr6:32191022-32203995:A	1388	CREBL1	cAMP responsive element binding protein-like 1	5
TL13770	chr6:32240382-32244040:S	80864	EGFL8	EGF-like-domain, multiple 8	5
TL13840	chr6:35573628-35588625:A	7287	TULP1	tubby like protein 1	5
TL13876	chr6:38798529-39106545:S	1769	DNAH8	dynein, axonemal, heavy chain 8	5
TL13922	chr6:43089954-43097009:S	116138	KLHDC3	kelch domain containing 3	5
TL13953	chr6:44322826-44329592:S	3326	HSP90AB1	heat shock protein 90kDa alpha (cytosolic), class B member 1	5
TL13957	chr6:44374440-44389041:A	57505	AARS2	alanyl-tRNA synthetase 2, mitochondrial (putative)	5
TL14034	chr6:70982528-71069494:A	1297	COL9A1	collagen, type IX, alpha 1	5
TL14049	chr6:74282193-74287476:A	1915	EEF1A1	eukaryotic translation elongation factor 1 alpha 1	5
TL14052	chr6:75850761-75972343:A	1303	COL12A1	collagen, type XII, alpha 1	5
TL14060	chr6:79707001-79844708:A	55023	PHIP	pleckstrin homology domain interacting protein	5
TL14107	chr6:90409951-90586163:A	23195	MDN1	MDN1, midasin homolog (yeast)	5
TL14157	chr6:109868623-109871815:S	6610	SMPD2	sphingomyelin phosphodiesterase 2, neutral membrane (neutral sphingomyelinase)	5
TL14158	chr6:109871958-109883883:A	64780	MICAL1	microtubule associated monoxygenase, calponin and LIM domain containing 1	5
TL14630	chr7:44571927-44580662:A	54606	DDX56	DEAD (Asp-Glu-Ala-Asp) box polypeptide 56	5
TL14698	chr7:72355161-72360759:A	55695	NSUN5	NOL1/NOP2/Sun domain family, member 5	5
TL14727	chr7:74877581-74884001:S	155400	NSUN5B	NOL1/NOP2/Sun domain family, member 5B	5
TL14734	chr7:75382355-75454109:S	5447	POR	P450 (cytochrome) oxidoreductase	5
TL14854	chr7:99524518-99527758:S	10980	COPS6	COP9 constitutive photomorphogenic homolog subunit 6 (Arabidopsis)	5
TL14857	chr7:99542628-99554915:A	6878	TAF6	TAF6 RNA polymerase II, TATA box binding protein (TBP)-associated factor, 80kDa	5
TL14868	chr7:99771672-99803388:S	29990	PILRB	paired immunoglobin-like type 2 receptor beta	5
TL14883	chr7:100109310-100114728:S	2783	GNB2	guanine nucleotide binding protein (G protein), beta polypeptide 2	5
TL14899	chr7:100635977-100647731:A	8985	PLOD3	procollagen-lysine, 2-oxoglutarate 5-dioxygenase 3	5
TL15011	chr7:127819566-127837272:A	3614	IMPDH1	IMP (inosine monophosphate) dehydrogenase 1	5
TL15111	chr7:142788481-142798326:S	7791	ZYX	zyxin	5
TL15160	chr7:150404640-150408884:A	10922	FASTK	Fas-activated serine/threonine kinase	5
TL15493	chr8:68272450-68418466:A	10565	ARFGEF1	ADP-ribosylation factor guanine nucleotide-exchange factor 1(brefeldin A-inhibited)	5
TL15749	chr8:144719505-144726071:A	642475	C8orf73	chromosome 8 open reading frame 73	5
TL15756	chr8:144870494-144876621:S	225689	MAPK15	mitogen-activated protein kinase 15	5
TL15770	chr8:145231292-145234503:S	84232	MAF1	MAF1 homolog (S. cerevisiae)	5
TL15779	chr8:145549898-145552940:A	26233	FBXL6	F-box and leucine-rich repeat protein 6	5
TL15783	chr8:145608605-145613081:A	55630	SLC39A4	solute carrier family 39 (zinc transporter), member 4	5
TL15789	chr8:145692916-145698312:S	84988	PPP1R16A	protein phosphatase 1, regulatory (inhibitor) subunit 16A	5
TL15927	chr9:35089888-35093154:A	30968	STOML2	stomatin (EPB72)-like 2	5
TL15941	chr9:35726862-35739225:A	57704	GBA2	glucosidase, beta (bile acid) 2	5
TL16015	chr9:78982180-79222219:S	23230	VPS13A	vacuolar protein sorting 13 homolog A (S. cerevisiae)	5
TL16166	chr9:113162793-113286846:A	23392	KIAA0368	KIAA0368	5
TL16309	chr9:130635212-130684175:A	883	CCBL1	cysteine conjugate-beta lyase, cytoplasmic	5
TL16412	chr9:138508716-138560059:A	4851	NOTCH1	Notch homolog 1, translocation-associated (Drosophila)	5
TL16437	chr9:139053742-139060476:A	56654	NPDC1	neural proliferation, differentiation and control, 1	5
TL16457	chr9:139437667-139448679:S	10811	NOXA1	NADPH oxidase activator 1	5
TL16653	chrX:48201870-48213509:A	92745	SLC38A5	solute carrier family 38, member 5	5
TL16654	chrX:48219492-48229696:S	24140	FTSJ1	FtsJ homolog 1 (E. coli)	5
TL16785	chrX:69559715-69569956:S	54857	GDPD2	glycerophosphodiester phosphodiesterase domain containing 2	5
TL16798	chrX:70438352-70441929:S	26548	ITGB1BP2	integrin beta 1 binding protein (melusin) 2	5
TL17165	chrX:153412799-153428981:A	2539	G6PD	glucose-6-phosphate dehydrogenase	5
TL00001	chr1:850983-869824:S	148398	SAMD11	sterile alpha motif domain containing 11	4
TL00003	chr1:885829-890958:S	339451	KLHL17	kelch-like 17 (Drosophila)	4
TL00203	chr1:17121031-17172061:S	9696	CROCC	ciliary rootlet coiled-coil, rootletin	4
TL00271	chr1:23627642-23683258:A	55616	DDEFL1	development and differentiation enhancing factor-like 1	4
TL00278	chr1:23994675-23999881:A	2582	GALE	UDP-galactose-4-epimerase	4
TL00319	chr1:26481359-26517343:A	91544	UBXD5	UBX domain containing 5	4
TL00321	chr1:26520936-26543030:A	55057	AIM1L	absent in melanoma 1-like	4
TL00384	chr1:31814746-31825874:S	64129	TINAGL1	tubulointerstitial nephritis antigen-like 1	4
TL00399	chr1:32460557-32469792:S	8668	EIF3I	eukaryotic translation initiation factor 3, subunit I	4
TL00401	chr1:32489426-32524353:S	3932	LCK	lymphocyte-specific protein tyrosine kinase	4
TL00446	chr1:36322262-36326463:S	27285	TEKT2	tektin 2 (testicular)	4
TL00458	chr1:36704230-36721096:A	1441	CSF3R	colony stimulating factor 3 receptor (granulocyte)	4
TL00493	chr1:40193396-40208215:S	84879	MFSD2	major facilitator superfamily domain containing 2	4
TL00541	chr1:43689415-43692505:A	81888	HYI	hydroxypyruvate isomerase homolog (E. coli)	4
TL00550	chr1:44229866-44234785:S	149473	CCDC24	coiled-coil domain containing 24	4
TL00559	chr1:45021843-45026013:A	266675	BEST4	bestrophin 4	4
TL00565	chr1:45250416-45253928:S	7389	UROD	uroporphyrinogen decarboxylase	4
TL00583	chr1:46486003-46516732:S	8438	RAD54L	RAD54-like (S. cerevisiae)	4
TL00680	chr1:62692984-62926557:A	85440	DOCK7	dedicator of cytokinesis 7	4
TL00710	chr1:68667094-68688230:A	6121	RPE65	retinal pigment epithelium-specific protein 65kDa	4
TL00777	chr1:88922509-89074526:S	5586	PKN2	protein kinase N2	4
TL00913	chr1:112099776-112111722:S	11218	DDX20	DEAD (Asp-Glu-Ala-Asp) box polypeptide 20	4
TL00919	chr1:113018989-113044882:S	4343	MOV10	Mov10, Moloney leukemia virus 10, homolog (mouse)	4
TL01132	chr1:152186775-152197667:A	200186	CRTC2	CREB regulated transcription coactivator 2	4
TL01171	chr1:153424923-153429324:A	4582	MUC1	mucin 1, cell surface associated	4
TL01179	chr1:153526253-153537835:A	5313	PKLR	pyruvate kinase, liver and RBC	4
TL01180	chr1:153546200-153557080:S	2224	FDPS	farnesyl diphosphate synthase (farnesyl pyrophosphate synthetase, dimethylallyltranstransferase, geranyltranstransferase)	4
TL01183	chr1:153571675-153798948:A	55870	ASH1L	ash1 (absent, small, or homeotic)-like (Drosophila)	4
TL01271	chr1:158525000-158579978:A	1314	COPA	coatomer protein complex, subunit alpha	4
TL01287	chr1:159283355-159306384:A	257106	ARHGAP30	Rho GTPase activating protein 30	4
TL01295	chr1:159402817-159407634:S	5498	PPOX	protoporphyrinogen oxidase	4
TL01456	chr1:183532144-183553084:A	10625	IVNS1ABP	influenza virus NS1A binding protein	4
TL01457	chr1:183970305-184426708:S	83872	HMCN1	hemicentin 1	4
TL01749	chr1:234780593-234834437:A	55127	HEATR1	HEAT repeat containing 1	4
TL01893	chr10:22645304-22649243:S	23412	COMMD3	COMM domain containing 3	4
TL01933	chr10:32597864-32676119:A	80314	EPC1	enhancer of polycomb homolog 1 (Drosophila)	4
TL02105	chr10:75231674-75241348:A	8509	NDST2	N-deacetylase/N-sulfotransferase (heparan glucosaminyl) 2	4
TL02192	chr10:93673715-93780060:S	9044	BTAF1	BTAF1 RNA polymerase II, B-TFIID transcription factor-associated, 170kDa (Mot1 homolog, S. cerevisiae)	4
TL02212	chr10:96295563-96351846:S	3070	HELLS	helicase, lymphoid-specific	4
TL02296	chr10:103857314-103870200:A	8861	LDB1	LIM domain binding 1	4
TL02297	chr10:103882776-103900080:S	23082	PPRC1	peroxisome proliferator-activated receptor gamma, coactivator-related 1	4
TL02298	chr10:103901922-103913617:S	9221	NOLC1	nucleolar and coiled-body phosphoprotein 1	4
TL02330	chr10:105781035-105835628:A	1308	COL17A1	collagen, type XVII, alpha 1	4
TL02488	chr11:384216-394908:S	11187	PKP3	plakophilin 3	4
TL02511	chr11:808901-815217:S	57104	PNPLA2	patatin-like phospholipase domain containing 2	4
TL02521	chr11:1367704-1439904:S	9024	BRSK2	BR serine/threonine kinase 2	4
TL02536	chr11:2382335-2400851:A	29850	TRPM5	transient receptor potential cation channel, subfamily M, member 5	4
TL02584	chr11:6590572-6597268:A	1200	TPP1	tripeptidyl peptidase I	4
TL02621	chr11:10729386-10757866:S	9646	CTR9	Ctr9, Paf1/RNA polymerase II complex component, homolog (S. cerevisiae)	4
TL02648	chr11:17064699-17147930:A	5286	PIK3C2A	phosphoinositide-3-kinase, class 2, alpha polypeptide	4
TL02720	chr11:34029805-34080733:S	4076	CAPRIN1	cell cycle associated protein 1	4
TL02771	chr11:46834993-46896652:A	4038	LRP4	low density lipoprotein receptor-related protein 4	4
TL02774	chr11:47155656-47164534:A	29763	PACSIN3	protein kinase C and casein kinase substrate in neurons 3	4
TL02776	chr11:47217428-47226939:A	53	ACP2	acid phosphatase 2, lysosomal	4
TL02778	chr11:47247534-47308158:S	8567	MADD	MAP-kinase activating death domain	4
TL02792	chr11:47756245-47826633:A	23279	NUP160	nucleoporin 160kDa	4
TL02849	chr11:60391590-60399740:S	22917	ZP1	zona pellucida glycoprotein 1 (sperm receptor)	4
TL02850	chr11:60414777-60430632:A	27339	PRPF19	PRP19/PSO4 pre-mRNA processing factor 19 homolog (S. cerevisiae)	4
TL02861	chr11:60823494-60857242:A	1642	DDB1	damage-specific DNA binding protein 1, 127kDa	4
TL02934	chr11:63522605-63690094:A	28992	MACROD1	MACRO domain containing 1	4
TL02946	chr11:63809906-63813539:S	56834	GPR137	G protein-coupled receptor 137	4
TL02965	chr11:64448755-64458523:S	5526	PPP2R5B	protein phosphatase 2, regulatory subunit B', beta isoform	4
TL02976	chr11:64635916-64640283:S	7108	TM7SF2	transmembrane 7 superfamily member 2	4
TL03016	chr11:65540798-65550560:A	117144	CATSPER1	cation channel, sperm associated 1	4
TL03025	chr11:65856117-65860576:A	9610	RIN1	Ras and Rab interactor 1	4
TL03032	chr11:66004455-66033706:S	10072	DPP3	dipeptidyl-peptidase 3	4
TL03033	chr11:66034694-66057660:S	582	BBS1	Bardet-Biedl syndrome 1	4
TL03377	chr11:118460796-118469469:S	3145	HMBS	hydroxymethylbilane synthase	4
TL03381	chr11:118524959-118538584:S	64137	ABCG4	ATP-binding cassette, sub-family G (WHITE), member 4	4
TL03383	chr11:118561404-118566130:S	79849	PDZD3	PDZ domain containing 3	4
TL03543	chr12:6807832-6819279:S	10536	LEPREL2	leprecan-like 2	4
TL03544	chr12:6819635-6826818:S	2784	GNB3	guanine nucleotide binding protein (G protein), beta polypeptide 3	4
TL03712	chr12:31118045-31148992:S	1663	DDX11	DEAD/H (Asp-Glu-Ala-Asp/His) box polypeptide 11 (CHL1-like helicase homolog, S. cerevisiae)	4
TL03732	chr12:38905080-39049353:S	120892	LRRK2	leucine-rich repeat kinase 2	4
TL03773	chr12:47446241-47469087:A	112	ADCY6	adenylate cyclase 6	4
TL03792	chr12:48003237-48011781:S	10024	TROAP	trophinin associated protein (tastin)	4
TL03885	chr12:52160546-52179538:A	7786	MAP3K12	mitogen-activated protein kinase kinase kinase 12	4
TL03901	chr12:52960754-52965297:S	3178	HNRNPA1	heterogeneous nuclear ribonucleoprotein A1	4
TL03927	chr12:54611212-54634074:S	1606	DGKA	diacylglycerol kinase, alpha 80kDa	4
TL03975	chr12:55909818-55914981:S	6472	SHMT2	serine hydroxymethyltransferase 2 (mitochondrial)	4
TL03982	chr12:56152304-56159900:A	64333	ARHGAP9	Rho GTPase activating protein 9	4
TL03985	chr12:56202925-56210198:S	114785	MBD6	methyl-CpG binding domain protein 6	4
TL03994	chr12:56405260-56422207:A	116986	CENTG1	centaurin, gamma 1	4
TL04235	chr12:110328134-110373810:S	10019	SH2B3	SH2B adaptor protein 3	4
TL04313	chr12:120132046-120156292:S	5025	P2RX4	purinergic receptor P2X, ligand-gated ion channel, 4	4
TL04358	chr12:122812994-122986220:S	196385	DNAH10	dynein, axonemal, heavy chain 10	4
TL04365	chr12:123997324-124039620:A	57647	DHX37	DEAH (Asp-Glu-Ala-His) box polypeptide 37	4
TL04584	chr13:72227540-72254007:A	22894	DIS3	DIS3 mitotic control homolog (S. cerevisiae)	4
TL04623	chr13:98134056-98202909:A	6564	SLC15A1	solute carrier family 15 (oligopeptide transporter), member 1	4
TL04729	chr14:22459572-22468501:A	10419	PRMT5	protein arginine methyltransferase 5	4
TL04764	chr14:23682413-23685695:A	5721	PSME2	proteasome (prosome, macropain) activator subunit 2 (PA28 beta)	4
TL04783	chr14:23875066-23879082:A	11035	RIPK3	receptor-interacting serine-threonine kinase 3	4
TL05195	chr14:104226987-104256992:S	64423	INF2	inverted formin, FH2 and WH2 domain containing	4
TL05210	chr14:104957230-105008102:S	9112	MTA1	metastasis associated 1	4
TL05211	chr14:105012175-105017545:S	1397	CRIP2	cysteine-rich protein 2	4
TL05380	chr15:46487796-46725210:A	2200	FBN1	fibrillin 1	4
TL05395	chr15:48639781-48766286:A	54822	TRPM7	transient receptor potential cation channel, subfamily M, member 7	4
TL05461	chr15:61687869-61913200:A	8925	HERC1	hect (homologous to the E6-AP (UBE3A) carboxyl terminus) domain and RCC1 (CHC1)-like domain (RLD) 1	4
TL05531	chr15:70364122-70399579:A	60677	BRUNOL6	bruno-like 6, RNA binding protein (Drosophila)	4
TL05634	chr15:81125087-81175689:A	8120	AP3B2	adaptor-related protein complex 3, beta 2 subunit	4
TL05668	chr15:87588197-87661366:S	55215	FANCI	Fanconi anemia, complementation group I	4
TL05748	chr16:360776-371951:A	58986	TMEM8	transmembrane protein 8 (five membrane-spanning domains)	4
TL05762	chr16:666075-668268:S	9028	RHBDL1	rhomboid, veinlet-like 1 (Drosophila)	4
TL05763	chr16:670115-672769:S	10273	STUB1	STIP1 homology and U-box containing protein 1	4
TL05770	chr16:716958-719716:S	84264	HAGHL	hydroxyacylglutathione hydrolase-like	4
TL05796	chr16:1500430-1597301:A	9742	IFT140	intraflagellar transport 140 homolog (Chlamydomonas)	4
TL05801	chr16:1760321-1761711:A	4832	NME3	non-metastatic cells 3, protein expressed in	4
TL05803	chr16:1763229-1766240:S	197342	EME2	essential meiotic endonuclease 1 homolog 2 (S. pombe)	4
TL05817	chr16:1968918-1971441:A	124056	NOXO1	NADPH oxidase organizer 1	4
TL05820	chr16:1987768-1999764:A	90850	ZNF598	zinc finger protein 598	4
TL05833	chr16:2226468-2228713:S	1775	DNASE1L2	deoxyribonuclease I-like 2	4
TL05839	chr16:2461500-2464147:S	4917	NTN2L	netrin 2-like (chicken)	4
TL05842	chr16:2510427-2519733:S	51005	AMDHD2	amidohydrolase domain containing 2	4
TL05854	chr16:2954217-2958382:S	79412	KREMEN2	kringle containing transmembrane protein 2	4
TL05861	chr16:3017868-3025543:A	146439	CCDC64B	coiled-coil domain containing 64B	4
TL05862	chr16:3036682-3050725:S	64386	MMP25	matrix metallopeptidase 25	4
TL05915	chr16:8893451-8964842:A	7874	USP7	ubiquitin specific peptidase 7 (herpes virus-associated)	4
TL06021	chr16:24458408-24491684:S	5930	RBBP6	retinoblastoma binding protein 6	4
TL06045	chr16:28510766-28515892:A	6799	SULT1A2	sulfotransferase family, cytosolic, 1A, phenol-preferring, member 2	4
TL06046	chr16:28524416-28542367:A	6817	SULT1A1	sulfotransferase family, cytosolic, 1A, phenol-preferring, member 1	4
TL06053	chr16:28823242-28844033:A	79874	RABEP2	rabaptin, RAB GTPase binding effector protein 2	4
TL06060	chr16:29373375-29383781:S	445329|548593|79008	GIYD1|GIYD2|SULT1A4	GIY-YIG domain containing 1|GIY-YIG domain containing 2|sulfotransferase family, cytosolic, 1A, phenol-preferring, member 4	4
TL06081	chr16:29971991-29989236:S	226	ALDOA	aldolase A, fructose-bisphosphate	4
TL06085	chr16:30023631-30032379:A	79153	GDPD3	glycerophosphodiester phosphodiesterase domain containing 3	4
TL06089	chr16:30112717-30123151:S	548593|6818|79008	GIYD1|GIYD2|SULT1A3	GIY-YIG domain containing 1|GIY-YIG domain containing 2|sulfotransferase family, cytosolic, 1A, phenol-preferring, member 3	4
TL06090	chr16:30271668-30274128:A	10421	CD2BP2	CD2 (cytoplasmic tail) binding protein 2	4
TL06093	chr16:30296956-30301672:A	1731	SEPT1	septin 1	4
TL06105	chr16:30583278-30589632:S	64319	FBRS	fibrosin	4
TL06107	chr16:30667237-30676183:S	5261	PHKG2	phosphorylase kinase, gamma 2 (testis)	4
TL06113	chr16:30843396-30867605:S	54620	FBXL19	F-box and leucine-rich repeat protein 19	4
TL06115	chr16:30876115-30903482:S	9739	SETD1A	SET domain containing 1A	4
TL06121	chr16:31002245-31007631:A	339105	POL3S	polyserase 3	4
TL06126	chr16:31057749-31068888:A	146547	PRSS36	protease, serine, 36	4
TL06136	chr16:31390984-31396781:S	7041	TGFB1I1	transforming growth factor beta 1 induced transcript 1	4
TL06138	chr16:31408315-31427207:A	64755	C16orf58	chromosome 16 open reading frame 58	4
TL06235	chr16:57106927-57111053:S	79918	SETD6	SET domain containing 6	4
TL06236	chr16:57111355-57221251:A	23019	CNOT1	CCR4-NOT transcription complex, subunit 1	4
TL06253	chr16:65499525-65510267:A	1014	CDH16	cadherin 16, KSP-cadherin	4
TL06264	chr16:65754857-65761349:S	3299	HSF4	heat shock transcription factor 4	4
TL06287	chr16:66254350-66258129:A	84080	C16orf48	chromosome 16 open reading frame 48	4
TL06298	chr16:66525907-66528254:A	5699	PSMB10	proteasome (prosome, macropain) subunit, beta type, 10	4
TL06340	chr16:69252607-69277455:A	92154	ABBA-1	actin-bundling protein with BAIAP2 homology	4
TL06358	chr16:70685115-70704312:S	9785	DHX38	DEAH (Asp-Glu-Ala-His) box polypeptide 38	4
TL06453	chr16:87300391-87309287:S	348180	C16orf84	chromosome 16 open reading frame 84	4
TL06509	chr17:1880180-1893475:S	124641|1801	DPH1|OVCA2	DPH1 homolog (S. cerevisiae)|candidate tumor suppressor in ovarian cancer 2	4
TL06543	chr17:4480962-4491709:A	246	ALOX15	arachidonate 15-lipoxygenase	4
TL06544	chr17:4521427-4554381:A	27043	PELP1	proline, glutamate and leucine rich protein 1	4
TL06545	chr17:4560537-4571544:S	409	ARRB2	arrestin, beta 2	4
TL06561	chr17:4803243-4811856:A	9552	SPAG7	sperm associated antigen 7	4
TL06564	chr17:4841999-4868720:S	10749	KIF1C	kinesin family member 1C	4
TL06565	chr17:4876620-4879451:A	55065	GPR172B	G protein-coupled receptor 172B	4
TL06590	chr17:6840107-6854779:S	239	ALOX12	arachidonate 12-lipoxygenase	4
TL06612	chr17:7199220-7201262:S	339168	TMEM95	transmembrane protein 95	4
TL06628	chr17:7423528-7426153:S	968	CD68	CD68 molecule	4
TL06631	chr17:7435271-7458796:A	9513	FXR2	fragile X mental retardation, autosomal homolog 2	4
TL06632	chr17:7470280-7471889:A	112483	SAT2	spermidine/spermine N1-acetyltransferase family member 2	4
TL06635	chr17:7512444-7531642:A	7157	TP53	tumor protein p53	4
TL06636	chr17:7532519-7547544:S	55135	WDR79	WD repeat domain 79	4
TL06647	chr17:7846716-7864382:S	3000	GUCY2D	guanylate cyclase 2D, membrane (retina-specific)	4
TL06665	chr17:8318254-8474761:A	4628	MYH10	myosin, heavy chain 10, non-muscle	4
TL06807	chr17:24206168-24212198:S	26284	ERAL1	Era G-protein-like 1 (E. coli)	4
TL06808	chr17:24230482-24248841:A	2319	FLOT2	flotillin 2	4
TL06811	chr17:24306072-24357207:A	124925	SEZ6	seizure related 6 homolog (mouse)	4
TL06813	chr17:24424653-24531533:A	399687	MYO18A	myosin XVIIIA	4
TL06821	chr17:24965899-24972620:A	84940	CORO6	coronin 6	4
TL06880	chr17:31160600-31198351:S	8148	TAF15	TAF15 RNA polymerase II, TATA box binding protein (TBP)-associated factor, 68kDa	4
TL06950	chr17:35428875-35464415:A	9862	MED24	mediator complex subunit 24	4
TL06991	chr17:37019556-37022605:A	3868	KRT16	keratin 16 (focal non-epidermolytic palmoplantar keratoderma)	4
TL07022	chr17:37977858-37983375:A	29893	PSMC3IP	PSMC3 interacting protein	4
TL07036	chr17:38238948-38249303:S	10197	PSME3	proteasome (prosome, macropain) activator subunit 3 (PA28 gamma; Ki)	4
TL07071	chr17:39682565-39700993:A	6521	SLC4A1	solute carrier family 4, anion exchanger, member 1 (erythrocyte membrane protein band 3, Diego blood group)	4
TL07072	chr17:39741489-39750764:S	10900	RUNDC3A	RUN domain containing 3A	4
TL07073	chr17:39752521-39757658:A	51629	SLC25A39	solute carrier family 25, member 39	4
TL07093	chr17:40655074-40680466:S	752	FMNL1	formin-like 1	4
TL07167	chr17:45545033-45562166:A	201191	SAMD14	sterile alpha motif domain containing 14	4
TL07216	chr17:53733592-53760477:A	9256	BZRAP1	benzodiazapine receptor (peripheral) associated protein 1	4
TL07367	chr17:71134544-71174864:A	9400	RECQL5	RecQ protein-like 5	4
TL07393	chr17:71897490-71960883:A	63893	UBE2O	ubiquitin-conjugating enzyme E2O	4
TL07395	chr17:71978569-72009103:A	79651	RHBDF2	rhomboid 5 homolog 2 (Drosophila)	4
TL07433	chr17:75689949-75708274:S	2548	GAA	glucosidase, alpha; acid (Pompe disease, glycogen storage disease type II)	4
TL07465	chr17:77418885-77422527:A	396	ARHGDIA	Rho GDP dissociation inhibitor (GDI) alpha	4
TL07557	chr18:12998498-13115051:S	55125	CEP192	centrosomal protein 192kDa	4
TL07636	chr18:41918107-41938197:A	498	ATP5A1	ATP synthase, H+ transporting, mitochondrial F1 complex, alpha subunit 1, cardiac muscle	4
TL07777	chr19:960649-972141:A	91304	C19orf6	chromosome 19 open reading frame 6	4
TL07782	chr19:1054935-1057787:S	2879	GPX4	glutathione peroxidase 4 (phospholipid hydroperoxidase)	4
TL07805	chr19:1560294-1601277:A	6929	TCF3	transcription factor 3 (E2A immunoglobulin enhancer binding factors E12/E47)	4
TL07808	chr19:1766244-1799452:A	57455	REXO1	REX1, RNA exonuclease 1 homolog (S. cerevisiae)	4
TL07817	chr19:2047867-2050583:S	113177	C19orf36	chromosome 19 open reading frame 36	4
TL07843	chr19:2928561-2946176:S	79816	TLE6	transducin-like enhancer of split 6 (E(sp1) homolog, Drosophila)	4
TL07885	chr19:4423254-4453222:S	84717	HDGF2	hepatoma-derived growth factor-related protein 2	4
TL07941	chr19:7353677-7443371:S	23370	ARHGEF18	rho/rac guanine nucleotide exchange factor (GEF) 18	4
TL07971	chr19:8293467-8314146:A	256949	KANK3	KN motif and ankyrin repeat domains 3	4
TL08000	chr19:10013031-10045811:S	388503	LOC388503	similar to Complement C3 precursor	4
TL08005	chr19:10105021-10166811:A	1786	DNMT1	DNA (cytosine-5-)-methyltransferase 1	4
TL08010	chr19:10261654-10268453:S	7087	ICAM5	intercellular adhesion molecule 5, telencephalin	4
TL08020	chr19:10515646-10525094:S	84971	ATG4D	ATG4 autophagy related 4 homolog D (S. cerevisiae)	4
TL08025	chr19:10625987-10664095:S	3609	ILF3	interleukin enhancer binding factor 3, 90kDa	4
TL08046	chr19:11392271-11406980:A	115948	CCDC151	coiled-coil domain containing 151	4
TL08047	chr19:11407268-11422782:S	5589	PRKCSH	protein kinase C substrate 80K-H	4
TL08081	chr19:12647533-12653677:A	1725	DHPS	deoxyhypusine synthase	4
TL08089	chr19:12778427-12785462:S	10535	RNASEH2A	ribonuclease H2, subunit A	4
TL08094	chr19:12862973-12871783:S	2639	GCDH	glutaryl-Coenzyme A dehydrogenase	4
TL08097	chr19:12910422-12916303:S	811	CALR	calreticulin	4
TL08098	chr19:12917653-12925455:S	5886	RAD23A	RAD23 homolog A (S. cerevisiae)	4
TL08124	chr19:14380630-14391171:A	10212	DDX39	DEAD (Asp-Glu-Ala-Asp) box polypeptide 39	4
TL08141	chr19:15198729-15204231:A	79852	ABHD9	abhydrolase domain containing 9	4
TL08144	chr19:15351858-15390833:A	26993	AKAP8L	A kinase (PRKA) anchor protein 8-like	4
TL08180	chr19:17253453-17259454:S	126549	ANKLE1	ankyrin repeat and LEM domain containing 1	4
TL08190	chr19:17442299-17477977:S	376497	SLC27A1	solute carrier family 27 (fatty acid transporter), member 1	4
TL08196	chr19:17723335-17760365:S	23149	FCHO1	FCH domain only 1	4
TL08199	chr19:17797960-17819800:A	3718	JAK3	Janus kinase 3 (a protein tyrosine kinase, leukocyte)	4
TL08201	chr19:17843781-17866983:S	6528	SLC5A5	solute carrier family 5 (sodium iodide symporter), member 5	4
TL08232	chr19:18891493-18900436:S	54555	DDX49	DEAD (Asp-Glu-Ala-Asp) box polypeptide 49	4
TL08286	chr19:34994740-35007059:S	898	CCNE1	cyclin E1	4
TL08293	chr19:37779746-37857942:A	84079	ANKRD27	ankyrin repeat domain 27 (VPS9 domain)	4
TL08322	chr19:40223249-40249315:S	3249	HPN	hepsin (transmembrane protease, serine 1)	4
TL08329	chr19:40431398-40450707:S	51599	LSR	lipolysis stimulated lipoprotein receptor	4
TL08330	chr19:40451735-40462558:S	7392	USF2	upstream transcription factor 2, c-fos interacting	4
TL08351	chr19:40931351-40937260:S	55957	LIN37	lin-37 homolog (C. elegans)	4
TL08355	chr19:40982731-40996041:A	58510	PRODH2	proline dehydrogenase (oxidase) 2	4
TL08358	chr19:41051240-41062539:S	333	APLP1	amyloid beta (A4) precursor-like protein 1	4
TL08422	chr19:43997901-44014337:A	1891	ECH1	enoyl Coenzyme A hydratase 1, peroxisomal	4
TL08423	chr19:44018867-44034819:A	3191	HNRNPL	heterogeneous nuclear ribonucleoprotein L	4
TL08453	chr19:45007829-45016681:A	9149	DYRK1B	dual-specificity tyrosine-(Y)-phosphorylation regulated kinase 1B	4
TL08455	chr19:45045802-45132373:A	8857	FCGBP	Fc fragment of IgG binding protein	4
TL08465	chr19:45546171-45576230:S	23646	PLD3	phospholipase D family, member 3	4
TL08511	chr19:47194312-47261797:A	2901	GRIK5	glutamate receptor, ionotropic, kainate 5	4
TL08513	chr19:47284505-47328470:A	5452	POU2F2	POU class 2 homeobox 2	4
TL08544	chr19:48739303-48771555:A	7515	XRCC1	X-ray repair complementing defective repair in Chinese hamster cells 1	4
TL08602	chr19:50680389-50692153:A	6253	RTN2	reticulon 2	4
TL08648	chr19:52670211-52679333:A	11133	KPTN	kaptin (actin binding protein)	4
TL08734	chr19:54886218-54908800:S	126129	CPT1C	carnitine palmitoyltransferase 1C	4
TL08864	chr19:59652211-59665008:S	114823	LENG8	leukocyte receptor cluster (LRC) member 8	4
TL08892	chr19:60487345-60515715:S	84446	BRSK1	BR serine/threonine kinase 1	4
TL09024	chr2:10180185-10188074:S	6241	RRM2	ribonucleotide reductase M2 polypeptide	4
TL09027	chr2:10497958-10505904:A	4953	ODC1	ornithine decarboxylase 1	4
TL09118	chr2:27504976-27518628:S	29959	NRBP1	nuclear receptor binding protein 1	4
TL09119	chr2:27518766-27520668:S	200634	KRTCAP3	keratinocyte associated protein 3	4
TL09183	chr2:39329925-39517723:A	8491	MAP4K3	mitogen-activated protein kinase kinase kinase kinase 3	4
TL09199	chr2:43968390-44076648:A	10128	LRPPRC	leucine-rich PPR-motif containing	4
TL09245	chr2:55715968-55774463:A	87178	PNPT1	polyribonucleotide nucleotidyltransferase 1	4
TL09348	chr2:74506495-74522568:A	6242	RTKN	rhotekin	4
TL09353	chr2:74554736-74563631:A	84865	CCDC142	coiled-coil domain containing 142	4
TL09356	chr2:74585677-74588329:A	84759	PCGF1	polycomb group ring finger 1	4
TL09364	chr2:74734900-74762693:S	10505	SEMA4F	sema domain, immunoglobulin domain (Ig), transmembrane domain (TM) and short cytoplasmic domain, (semaphorin) 4F	4
TL09406	chr2:86521864-86573350:S	55818	JMJD1A	jumonji domain containing 1A	4
TL09458	chr2:97696462-97722755:S	7535	ZAP70	zeta-chain (TCR) associated protein kinase 70kDa	4
TL09475	chr2:99320265-99383160:S	9669	EIF5B	eukaryotic translation initiation factor 5B	4
TL09523	chr2:111111880-111152135:A	699	BUB1	BUB1 budding uninhibited by benzimidazoles 1 homolog (yeast)	4
TL09599	chr2:130830087-130848614:S	26469	PTPN18	protein tyrosine phosphatase, non-receptor type 18 (brain-derived)	4
TL09622	chr2:136005552-136199309:S	23518	R3HDM1	R3H domain containing 1	4
TL09798	chr2:189604885-189752850:A	1290	COL5A2	collagen, type V, alpha 2	4
TL09828	chr2:197964942-198008016:A	23451	SF3B1	splicing factor 3b, subunit 1, 155kDa	4
TL09963	chr2:219782737-219791916:A	10058	ABCB6	ATP-binding cassette, sub-family B (MDR/TAP), member 6	4
TL09964	chr2:219792345-219802605:A	79065	ATG9A	ATG9 autophagy related 9 homolog A (S. cerevisiae)	4
TL09965	chr2:219802722-219809635:S	55139	ANKZF1	ankyrin repeat and zinc finger domain containing 1	4
TL09971	chr2:219946423-219960906:A	23549	DNPEP	aspartyl aminopeptidase	4
TL09978	chr2:220123708-220144255:A	23363	OBSL1	obscurin-like 1	4
TL09980	chr2:220170839-220189417:S	114790	STK11IP	serine/threonine kinase 11 interacting protein	4
TL10097	chr2:241776596-241813464:S	50636	TMEM16G	transmembrane protein 16G	4
TL10154	chr20:2769372-2967315:S	5786|64601	PTPRA|VPS16	protein tyrosine phosphatase, receptor type, A|vacuolar protein sorting 16 homolog (S. cerevisiae)	4
TL10287	chr20:29870838-29886161:S	85366	MYLK2	myosin light chain kinase 2	4
TL10391	chr20:39402973-39422636:S	64900	LPIN3	lipin 3	4
TL10424	chr20:43355500-43367645:A	8785	MATN4	matrilin 4	4
TL10430	chr20:43478137-43488298:S	51604	PIGT	phosphatidylinositol glycan anchor biosynthesis, class T	4
TL10454	chr20:44070953-44078607:S	4318	MMP9	matrix metallopeptidase 9 (gelatinase B, 92kDa gelatinase, 92kDa type IV collagenase)	4
TL10471	chr20:47096244-47146893:S	1434	CSE1L	CSE1 chromosome segregation 1-like (yeast)	4
TL10473	chr20:47269290-47294021:S	55661	DDX27	DEAD (Asp-Glu-Ala-Asp) box polypeptide 27	4
TL10580	chr20:61841654-61845847:S	56731	SLC2A4RG	SLC2A4 regulator	4
TL10623	chr21:29350518-29367881:A	10694	CCT8	chaperonin containing TCP1, subunit 8 (theta)	4
TL10739	chr21:45649524-45758062:S	80781	COL18A1	collagen, type XVIII, alpha 1	4
TL10799	chr22:19108874-19122146:A	91179	SCARF2	scavenger receptor class F, member 2	4
TL10801	chr22:19191885-19271919:S	51586	MED15	mediator complex subunit 15	4
TL10807	chr22:19666557-19683326:S	8216	LZTR1	leucine-zipper-like transcription regulator 1	4
TL10839	chr22:22506689-22511201:A	91319	DERL3	Der1-like domain family, member 3	4
TL10912	chr22:29302611-29317894:A	23481	PES1	pescadillo homolog 1, containing BRCT domain (zebrafish)	4
TL10928	chr22:30222260-30344534:S	9814	SFI1	Sfi1 homolog, spindle assembly associated (yeast)	4
TL11124	chr22:48740164-48743724:S	415116	PIM3	pim-3 oncogene	4
TL11147	chr22:49385996-49396845:S	23542	MAPK8IP2	mitogen-activated protein kinase 8 interacting protein 2	4
TL11149	chr22:49459935-49518507:S	85358	SHANK3	SH3 and multiple ankyrin repeat domains 3	4
TL11180	chr3:9774030-9786661:A	8536	CAMK1	calcium/calmodulin-dependent protein kinase I	4
TL11334	chr3:41215945-41256943:S	1499	CTNNB1	catenin (cadherin-associated protein), beta 1, 88kDa	4
TL11388	chr3:46685682-46710175:A	259173	ALS2CL	ALS2 C-terminal like	4
TL11426	chr3:48686281-48698338:A	51517	NCKIPSD	NCK interacting protein with SH3 domain	4
TL11432	chr3:49019829-49028386:S	11180	WDR6	WD repeat domain 6	4
TL11467	chr3:50167851-50201512:S	6405	SEMA3F	sema domain, immunoglobulin domain (Ig), short basic domain, secreted, (semaphorin) 3F	4
TL11468	chr3:50204046-50208953:S	2779	GNAT1	guanine nucleotide binding protein (G protein), alpha transducing activity polypeptide 1	4
TL11515	chr3:52442307-52454083:A	56920	SEMA3G	sema domain, immunoglobulin domain (Ig), short basic domain, secreted, (semaphorin) 3G	4
TL11588	chr3:69186570-69212214:A	9039	UBA3	ubiquitin-like modifier activating enzyme 3	4
TL11746	chr3:124110732-124229266:A	54437	SEMA5B	sema domain, seven thrombospondin repeats (type 1 and type 1-like), transmembrane domain (TM) and short cytoplasmic domain, (semaphorin) 5B	4
TL11809	chr3:131761867-131878578:S	131873	COL6A6	collagen type VI alpha 6	4
TL11818	chr3:133619242-133740566:S	23317	DNAJC13	DnaJ (Hsp40) homolog, subfamily C, member 13	4
TL11925	chr3:156280129-156384212:S	4311	MME	membrane metallo-endopeptidase	4
TL12031	chr3:185450138-185493513:S	9718	ECE2	endothelin converting enzyme 2	4
TL12033	chr3:185499715-185509534:S	5708	PSMD2	proteasome (prosome, macropain) 26S subunit, non-ATPase, 2	4
TL12092	chr3:195604691-195670257:A	79572	ATP13A3	ATPase type 13A3	4
TL12171	chr4:3046205-3215485:S	3064	HTT	huntingtin	4
TL12174	chr4:3413523-3421011:S	3083	HGFAC	HGF activator	4
TL12362	chr4:68858699-68898419:A	91746	YTHDC1	YTH domain containing 1	4
TL12431	chr4:77090091-77131137:A	55153	SDAD1	SDA1 domain containing 1	4
TL12480	chr4:87734908-87955326:S	5783	PTPN13	protein tyrosine phosphatase, non-receptor type 13 (APO-1/CD95 (Fas)-associated phosphatase)	4
TL12574	chr4:111616677-111703942:S	2028	ENPEP	glutamyl aminopeptidase (aminopeptidase A)	4
TL12662	chr4:146238605-146270126:S	6059	ABCE1	ATP-binding cassette, sub-family E (OABP), member 1	4
TL12741	chr4:170551003-170770189:A	4750	NEK1	NIMA (never in mitosis gene a)-related kinase 1	4
TL12897	chr5:36912741-37101678:S	25836	NIPBL	Nipped-B homolog (Drosophila)	4
TL13201	chr5:132185910-132189901:A	134549	SHROOM1	shroom family member 1	4
TL13273	chr5:139918036-139924373:A	10307	APBB3	amyloid beta (A4) precursor protein-binding, family B, member 3	4
TL13276	chr5:139999195-140005173:S	55374	TMCO6	transmembrane and coiled-coil domains 6	4
TL13287	chr5:140980626-140996607:A	8841	HDAC3	histone deacetylase 3	4
TL13289	chr5:140999052-141011170:A	89848	FCHSD1	FCH and double SH3 domains 1	4
TL13308	chr5:145472781-145542487:A	51520	LARS	leucyl-tRNA synthetase	4
TL13375	chr5:154072654-154177356:S	23367	LARP1	La ribonucleoprotein domain family, member 1	4
TL13468	chr5:176170165-176240505:S	90249	UNC5A	unc-5 homolog A (C. elegans)	4
TL13478	chr5:176717449-176732205:S	10636	RGS14	regulator of G-protein signaling 14	4
TL13483	chr5:176816219-176833300:A	1627	DBN1	drebrin 1	4
TL13508	chr5:178973785-178983276:A	3187	HNRNPH1	heterogeneous nuclear ribonucleoprotein H1 (H)	4
TL13621	chr6:24536383-24597829:A	2822	GPLD1	glycosylphosphatidylinositol specific phospholipase D1	4
TL13633	chr6:25953306-25982450:A	10786	SLC17A3	solute carrier family 17 (sodium phosphate), member 3	4
TL13650	chr6:27323486-27332229:S	10279	PRSS16	protease, serine, 16 (thymus)	4
TL13746	chr6:31815752-31838431:S	4439	MSH5	mutS homolog 5 (E. coli)	4
TL13761	chr6:32045566-32048011:A	1797	DOM3Z	dom-3 homolog Z (C. elegans)	4
TL13772	chr6:32254139-32256548:S	6048	RNF5	ring finger protein 5	4
TL13792	chr6:33044414-33057260:S	6046	BRD2	bromodomain containing 2	4
TL13799	chr6:33280396-33282585:S	7923	HSD17B8	hydroxysteroid (17-beta) dehydrogenase 8	4
TL13801	chr6:33326026-33347640:A	6293	VPS52	vacuolar protein sorting 52 homolog (S. cerevisiae)	4
TL13808	chr6:33467290-33485677:S	3833	KIFC1	kinesin family member C1	4
TL13810	chr6:33492296-33494043:A	51596	CUTA	cutA divalent cation tolerance homolog (E. coli)	4
TL13927	chr6:43152006-43237435:S	5754	PTK7	PTK7 protein tyrosine kinase 7	4
TL13952	chr6:44295219-44309866:S	2030	SLC29A1	solute carrier family 29 (nucleoside transporters), member 1	4
TL14018	chr6:56029346-56220337:A	81578	COL21A1	collagen, type XXI, alpha 1	4
TL14083	chr6:86271933-86360348:A	57231	SNX14	sorting nexin 14	4
TL14260	chr6:134532076-134537727:A	6446	SGK1	serum/glucocorticoid regulated kinase 1	4
TL14404	chr6:170433218-170441622:A	28514	DLL1	delta-like 1 (Drosophila)	4
TL14508	chr7:21549357-21907982:S	8701	DNAH11	dynein, axonemal, heavy chain 11	4
TL14681	chr7:65178210-65195764:S	435	ASL	argininosuccinate lyase	4
TL14704	chr7:72645459-72676806:A	51085	MLXIPL	MLX interacting protein-like	4
TL14706	chr7:72735833-72750478:S	114049	WBSCR22	Williams Beuren syndrome chromosome region 22	4
TL14711	chr7:73080362-73122172:S	2006	ELN	elastin (supravalvular aortic stenosis, Williams-Beuren syndrome)	4
TL14768	chr7:86812946-86867045:S	54677	CROT	carnitine O-octanoyltransferase	4
TL14824	chr7:97683982-97719404:A	25851	DKFZP434B0335	DKFZP434B0335 protein	4
TL14829	chr7:98314048-98448775:S	8295	TRRAP	transformation/transcription domain-associated protein	4
TL14866	chr7:99654806-99657047:S	79037	PVRIG	poliovirus receptor related immunoglobulin domain containing	4
TL14882	chr7:100078663-100091986:A	51412	ACTL6B	actin-like 6B	4
TL14925	chr7:102899472-103417198:A	5649	RELN	reelin	4
TL14945	chr7:107193149-107230868:A	1811	SLC26A3	solute carrier family 26, member 3	4
TL14947	chr7:107351481-107431040:A	3912	LAMB1	laminin, beta 1	4
TL15156	chr7:150356442-150375802:S	11194	ABCB8	ATP-binding cassette, sub-family B (MDR/TAP), member 8	4
TL15205	chr8:1980564-2080787:S	9172	MYOM2	myomesin (M-protein) 2, 165kDa	4
TL15273	chr8:17824645-17931737:S	5108	PCM1	pericentriolar material 1	4
TL15553	chr8:87424109-87549294:S	11059	WWP1	WW domain containing E3 ubiquitin protein ligase 1	4
TL15572	chr8:94836320-94898323:S	91147	TMEM67	transmembrane protein 67	4
TL15748	chr8:144711634-144716374:S	79792	GSDMDC1	gasdermin domain containing 1	4
TL15763	chr8:145136213-145139571:S	2907	GRINA	glutamate receptor, ionotropic, N-methyl D-aspartate-associated protein 1 (glutamate binding)	4
TL15768	chr8:145221947-145224416:S	1537	CYC1	cytochrome c-1	4
TL15771	chr8:145264659-145267608:S	51236	C8orf30A	chromosome 8 open reading frame 30A	4
TL15784	chr8:145619807-145624735:A	51160	VPS28	vacuolar protein sorting 28 homolog (S. cerevisiae)	4
TL15932	chr9:35595280-35600038:S	7016	TESK1	testis-specific kinase 1	4
TL15934	chr9:35639296-35640947:A	27240	SIT1	signaling threshold regulating transmembrane adaptor 1	4
TL15937	chr9:35663914-35671154:S	768	CA9	carbonic anhydrase IX	4
TL15944	chr9:35782405-35799728:S	4882	NPR2	natriuretic peptide receptor B/guanylate cyclase B (atrionatriuretic peptide receptor B)	4
TL15945	chr9:35797781-35802259:A	26206	SPAG8	sperm associated antigen 8	4
TL16104	chr9:99040599-99179390:S	57653	KIAA1529	KIAA1529	4
TL16190	chr9:115188412-115203391:A	210	ALAD	aminolevulinate, delta-, dehydratase	4
TL16196	chr9:115893738-115901158:A	113220	KIF12	kinesin family member 12	4
TL16197	chr9:115958051-116112796:S	85301	COL27A1	collagen, type XXVII, alpha 1	4
TL16246	chr9:126655575-126659981:S	401551	WDR38	WD repeat domain 38	4
TL16367	chr9:135208486-135213182:A	6834	SURF1	surfeit 1	4
TL16427	chr9:138954707-138958994:A	54461	FBXW5	F-box and WD repeat domain containing 5	4
TL16432	chr9:139006690-139008249:S	286257	C9orf142	chromosome 9 open reading frame 142	4
TL16433	chr9:139008880-139010845:A	9022	CLIC3	chloride intracellular channel 3	4
TL16458	chr9:139448636-139455722:A	377841	ENTPD8	ectonucleoside triphosphate diphosphohydrolase 8	4
TL16459	chr9:139462497-139473575:A	26012	NELF	nasal embryonic LHRH factor	4
TL16464	chr9:139619916-139629633:S	92714	ARRDC1	arrestin domain containing 1	4
TL16608	chrX:41077594-41094468:S	1654	DDX3X	DEAD (Asp-Glu-Ala-Asp) box polypeptide 3, X-linked	4
TL16635	chrX:47316243-47364200:A	6853	SYN1	synapsin I	4
TL16655	chrX:48252314-48264146:S	64840	PORCN	porcupine homolog (Drosophila)	4
TL16796	chrX:70376198-70391148:A	9203	ZMYM3	zinc finger, MYM-type 3	4
TL16934	chrX:107569809-107827431:S	1287	COL4A5	collagen, type IV, alpha 5 (Alport syndrome)	4
TL16960	chrX:117513899-117704151:S	139818	DOCK11	dedicator of cytokinesis 11	4
TL17000	chrX:122922155-123064186:S	10735	STAG2	stromal antigen 2	4
TL17015	chrX:129164365-129230554:A	55609	ZNF280C	zinc finger protein 280C	4
TL17143	chrX:152866201-152890013:A	3054	HCFC1	host cell factor C1 (VP16-accessory protein)	4
TL17155	chrX:153282772-153293621:A	1774	DNASE1L1	deoxyribonuclease I-like 1	4
TL17158	chrX:153318714-153325008:S	2664	GDI1	GDP dissociation inhibitor 1	4
TL17206	chrY:13526170-13541784:S	8653	DDX3Y	DEAD (Asp-Glu-Ala-Asp) box polypeptide 3, Y-linked	4
TL00005	chr1:924206-925333:A	57801	HES4	hairy and enhancer of split 4 (Drosophila)	3
TL00013	chr1:1167695-1171965:A	388581	FAM132A	family with sequence similarity 132, member A	3
TL00039	chr1:1836125-1838593:S	163688	CALML6	calmodulin-like 6	3
TL00040	chr1:1838889-1840567:A	339456	TMEM52	transmembrane protein 52	3
TL00079	chr1:6407434-6443591:S	83715	ESPN	espin	3
TL00101	chr1:9019593-9052257:A	6518	SLC2A5	solute carrier family 2 (facilitated glucose/fructose transporter), member 5	3
TL00126	chr1:11089178-11245151:A	2475	FRAP1	FK506 binding protein 12-rapamycin associated protein 1	3
TL00131	chr1:11637018-11645971:S	93611	FBXO44	F-box protein 44	3
TL00196	chr1:16323418-16355151:A	1969	EPHA2	EPH receptor A2	3
TL00197	chr1:16397185-16411691:A	128272	ARHGEF19	Rho guanine nucleotide exchange factor (GEF) 19	3
TL00243	chr1:20850846-20860624:A	1650	DDOST	dolichyl-diphosphooligosaccharide-protein glycosyltransferase	3
TL00327	chr1:26895108-26981188:S	8289	ARID1A	AT rich interactive domain 1A (SWI-like)	3
TL00333	chr1:27120810-27145474:S	10726	NUDC	nuclear distribution gene C homolog (A. nidulans)	3
TL00374	chr1:29435633-29525903:S	10076	PTPRU	protein tyrosine phosphatase, receptor type, U	3
TL00435	chr1:35421787-35431322:A	6421	SFPQ	splicing factor proline/glutamine-rich (polypyrimidine tract binding protein associated)	3
TL00443	chr1:36046414-36093775:S	192670	EIF2C4	eukaryotic translation initiation factor 2C, 4	3
TL00475	chr1:38235028-38243821:A	2275	FHL3	four and a half LIM domains 3	3
TL00485	chr1:39799074-39815003:A	8761	PABPC4	poly(A) binding protein, cytoplasmic 4 (inducible form)	3
TL00537	chr1:43601658-43606286:A	64834	ELOVL1	elongation of very long chain fatty acids (FEN1/Elo2, SUR4/Elo3, yeast)-like 1	3
TL00555	chr1:44643546-44889983:S	55182	C1orf164	chromosome 1 open reading frame 164	3
TL00568	chr1:45577928-45582237:S	114034	TOE1	target of EGR1, member 1 (nuclear)	3
TL00581	chr1:46418798-46424217:S	10103	TSPAN1	tetraspanin 1	3
TL00595	chr1:47167432-47179743:A	1579	CYP4A11	cytochrome P450, family 4, subfamily A, polypeptide 11	3
TL00598	chr1:47375693-47387113:S	284541	CYP4A22	cytochrome P450, family 4, subfamily A, polypeptide 22	3
TL00623	chr1:52661535-52791331:A	23318	ZCCHC11	zinc finger, CCHC domain containing 11	3
TL00695	chr1:66030780-66612850:S	5142	PDE4B	phosphodiesterase 4B, cAMP-specific (phosphodiesterase E4 dunce homolog, Drosophila)	3
TL00722	chr1:74436513-74782696:S	51086|8790	FPGT|TNNI3K	TNNI3 interacting kinase|fucose-1-phosphate guanylyltransferase	3
TL00759	chr1:85256352-85286757:A	55283	MCOLN3	mucolipin 3	3
TL00806	chr1:93317379-93377226:S	22823	MTF2	metal response element binding transcription factor 2	3
TL00833	chr1:100321689-100371099:A	163786	SASS6	spindle assembly 6 homolog (C. elegans)	3
TL00866	chr1:109458055-109547377:S	57535	KIAA1324	KIAA1324	3
TL00886	chr1:110094224-110108087:A	79574	EPS8L3	EPS8-like 3	3
TL00889	chr1:110378763-110398786:S	85369	FAM40A	family with sequence similarity 40, member A	3
TL00924	chr1:113417353-113468865:S	9860	LRIG2	leucine-rich repeats and immunoglobulin-like domains 2	3
TL00951	chr1:116717358-116748919:S	476	ATP1A1	ATPase, Na+/K+ transporting, alpha 1 polypeptide	3
TL00964	chr1:118297810-118529357:A	200162	SPAG17	sperm associated antigen 17	3
TL00989	chr1:144236346-144255225:S	8515	ITGA10	integrin, alpha 10	3
TL00993	chr1:144303961-144322241:A	10623	POLR3C	polymerase (RNA) III (DNA directed) polypeptide C (62kD)	3
TL01032	chr1:148788521-148800036:S	54507	ADAMTSL4	ADAMTS-like 4	3
TL01042	chr1:149221122-149234738:S	8416	ANXA9	annexin A9	3
TL01063	chr1:149641823-149698556:A	23126	POGZ	pogo transposable element with ZNF domain	3
TL01064	chr1:149750496-149777791:S	57530	CGN	cingulin	3
TL01127	chr1:151917787-151933092:S	4881	NPR1	natriuretic peptide receptor A/guanylate cyclase A (atrionatriuretic peptide receptor A)	3
TL01129	chr1:152014391-152019257:S	11000	SLC27A3	solute carrier family 27 (fatty acid transporter), member 3	3
TL01134	chr1:152207020-152213456:S	148327	CREB3L4	cAMP responsive element binding protein 3-like 4	3
TL01154	chr1:153183182-153195191:A	57326	PBXIP1	pre-B-cell leukemia homeobox interacting protein 1	3
TL01173	chr1:153445113-153450248:S	4580	MTX1	metaxin 1	3
TL01228	chr1:155157047-155169504:S	149499	C1orf92	chromosome 1 open reading frame 92	3
TL01244	chr1:156847119-156923130:A	6708	SPTA1	spectrin, alpha, erythrocytic 1 (elliptocytosis 2)	3
TL01260	chr1:158163454-158182010:A	57549	IGSF9	immunoglobulin superfamily, member 9	3
TL01265	chr1:158352171-158379998:S	477	ATP1A2	ATPase, Na+/K+ transporting, alpha 2 (+) polypeptide	3
TL01301	chr1:159462456-159467031:S	84134	TOMM40L	translocase of outer mitochondrial membrane 40 homolog (yeast)-like	3
TL01366	chr1:167958405-167969803:A	6401	SELE	selectin E (endothelial adhesion molecule 1)	3
TL01438	chr1:181075073-181123507:S	1660	DHX9	DEAH (Asp-Glu-Ala-His) box polypeptide 9	3
TL01440	chr1:181259217-181381350:S	3915	LAMC1	laminin, gamma 1 (formerly LAMB2)	3
TL01490	chr1:196874759-196993168:S	5788	PTPRC	protein tyrosine phosphatase, receptor type, C	3
TL01507	chr1:199884072-200062720:S	89796	NAV1	neuron navigator 1	3
TL01567	chr1:204148799-204179211:A	115019	SLC26A9	solute carrier family 26, member 9	3
TL01572	chr1:204710418-204736845:S	9641	IKBKE	inhibitor of kappa light polypeptide gene enhancer in B-cells, kinase epsilon	3
TL01589	chr1:205694292-205729863:S	1380	CR2	complement component (3d/Epstein Barr virus) receptor 2	3
TL01600	chr1:207996146-208022288:S	80342	TRAF3IP3	TRAF3 interacting protein 3	3
TL01644	chr1:218334077-218388006:S	55699	IARS2	isoleucyl-tRNA synthetase 2, mitochondrial	3
TL01645	chr1:218390349-218512375:A	25782	RAB3GAP2	RAB3 GTPase activating protein subunit 2 (non-catalytic)	3
TL01694	chr1:226336983-226353536:S	375	ARF1	ADP-ribosylation factor 1	3
TL01696	chr1:226361002-226363636:A	128308	MRPL55	mitochondrial ribosomal protein L55	3
TL01794	chr1:247110827-247119894:A	55657	ZNF692	zinc finger protein 692	3
TL01807	chr10:3169919-3205003:A	10531	PITRM1	pitrilysin metallopeptidase 1	3
TL01819	chr10:5766806-5846949:S	54906	C10orf18	chromosome 10 open reading frame 18	3
TL01822	chr10:5972219-6019562:S	84893	FBXO18	F-box protein, helicase, 18	3
TL01848	chr10:13243586-13293110:S	55388	MCM10	minichromosome maintenance complex component 10	3
TL01894	chr10:22650145-22660192:S	648	BMI1	BMI1 polycomb ring finger oncogene	3
TL01902	chr10:24912548-25052550:A	57584	ARHGAP21	Rho GTPase activating protein 21	3
TL01924	chr10:29786282-30064736:A	6840	SVIL	supervillin	3
TL01932	chr10:32340076-32385221:A	3799	KIF5B	kinesin family member 5B	3
TL01952	chr10:43187097-43191789:S	53828	FXYD4	FXYD domain containing ion transport regulator 4	3
TL01994	chr10:50612716-50640375:A	55753	OGDHL	oxoglutarate dehydrogenase-like	3
TL02041	chr10:69843826-69901885:A	1763	DNA2	DNA replication helicase 2 homolog (yeast)	3
TL02117	chr10:76663734-76665776:A	118881	COMTD1	catechol-O-methyltransferase domain containing 1	3
TL02154	chr10:88685575-88707352:A	79812	MMRN2	multimerin 2	3
TL02205	chr10:95362334-95415419:S	5146	PDE6C	phosphodiesterase 6C, cGMP-specific, cone, alpha prime	3
TL02253	chr10:100165945-100196694:A	3257	HPS1	Hermansky-Pudlak syndrome 1	3
TL02278	chr10:102727568-102737262:A	84545	MRPL43	mitochondrial ribosomal protein L43	3
TL02303	chr10:104152365-104168891:A	5662	PSD	pleckstrin and Sec7 domain containing	3
TL02378	chr10:118991179-119027085:S	6571	SLC18A2	solute carrier family 18 (vesicular monoamine), member 2	3
TL02387	chr10:120890414-120915194:A	119559	SFXN4	sideroflexin 4	3
TL02442	chr10:129784914-129814645:A	4288	MKI67	antigen identified by monoclonal antibody Ki-67	3
TL02456	chr10:134471885-134521226:A	54777	C10orf92	chromosome 10 open reading frame 92	3
TL02478	chr11:198529-205110:S	60626	RIC8A	resistance to inhibitors of cholinesterase 8 homolog A (C. elegans)	3
TL02492	chr11:484511-497273:A	6050	RNH1	ribonuclease/angiogenin inhibitor 1	3
TL02494	chr11:527526-544914:S	115399	LRRC56	leucine rich repeat containing 56	3
TL02513	chr11:822951-828835:S	977	CD151	CD151 molecule (Raph blood group)	3
TL02575	chr11:6409016-6418769:A	3263	HPX	hemopexin	3
TL02580	chr11:6543910-6549825:S	144132	DNHD1	dynein heavy chain domain 1	3
TL02581	chr11:6577727-6581387:A	23378	KIAA0409	KIAA0409	3
TL02611	chr11:9362779-9423651:S	10527	IPO7	importin 7	3
TL02613	chr11:9550915-9567874:S	7465	WEE1	WEE1 homolog (S. pombe)	3
TL02646	chr11:16765785-16992535:A	144100	PLEKHA7	pleckstrin homology domain containing, family A member 7	3
TL02650	chr11:17371007-17455025:A	6833	ABCC8	ATP-binding cassette, sub-family C (CFTR/MRP), member 8	3
TL02670	chr11:18682427-18704353:A	283284	IGSF22	immunoglobulin superfamily, member 22	3
TL02714	chr11:33062705-33139613:A	1479	CSTF3	cleavage stimulation factor, 3' pre-RNA, subunit 3, 77kDa	3
TL02721	chr11:34083724-34125033:S	55226	NAT10	N-acetyltransferase 10	3
TL02745	chr11:44044432-44062145:S	84680	ACCS	1-aminocyclopropane-1-carboxylate synthase homolog (Arabidopsis)(non-functional)	3
TL02758	chr11:45887795-45896182:A	9409	PEX16	peroxisomal biogenesis factor 16	3
TL02769	chr11:46697330-46717631:S	2147	F2	coagulation factor II (thrombin)	3
TL02781	chr11:47386757-47394623:S	91252	SLC39A13	solute carrier family 39 (zinc transporter), member 13	3
TL02793	chr11:47958685-48148970:S	5795	PTPRJ	protein tyrosine phosphatase, receptor type, J	3
TL02799	chr11:56850034-56859927:A	6749	SSRP1	structure specific recognition protein 1	3
TL02805	chr11:57008582-57039735:A	8501	SLC43A1	solute carrier family 43, member 1	3
TL02860	chr11:60782333-60819364:A	220001	VWCE	von Willebrand factor C and EGF domains	3
TL02871	chr11:61279436-61312565:S	745	C11orf9	chromosome 11 open reading frame 9	3
TL02880	chr11:61648020-61677211:S	3619	INCENP	inner centromere protein antigens 135/155kDa	3
TL02902	chr11:62214322-62231395:A	26580	BSCL2	Bernardinelli-Seip congenital lipodystrophy 2 (seipin)	3
TL02914	chr11:62380093-62412929:S	6520	SLC3A2	solute carrier family 3 (activators of dibasic and neutral amino acid transport), member 2	3
TL02929	chr11:63363470-63433629:S	2011	MARK2	MAP/microtubule affinity-regulating kinase 2	3
TL02936	chr11:63710162-63728596:S	10963	STIP1	stress-induced-phosphoprotein 1 (Hsp70/Hsp90-organizing protein)	3
TL02938	chr11:63747846-63750257:A	83707	TRPT1	tRNA phosphotransferase 1	3
TL02950	chr11:63840740-63841609:A	51504	HSPC152	hypothetical protein HSPC152	3
TL02959	chr11:64288653-64302817:A	7536	SF1	splicing factor 1	3
TL02995	chr11:65121801-65138296:A	4296	MAP3K11	mitogen-activated protein kinase kinase kinase 11	3
TL02998	chr11:65178392-65186951:A	5970	RELA	v-rel reticuloendotheliosis viral oncogene homolog A, nuclear factor of kappa light polypeptide gene enhancer in B-cells 3, p65 (avian)	3
TL03002	chr11:65357985-65377748:S	254122	SNX32	sorting nexin 32	3
TL03018	chr11:65576391-65592958:S	10992	SF3B2	splicing factor 3b, subunit 2, 145kDa	3
TL03019	chr11:65594399-65768789:S	55690	PACS1	phosphofurin acidic cluster sorting protein 1	3
TL03043	chr11:66367458-66370579:S	9986	RCE1	RCE1 homolog, prenyl protein peptidase (S. cerevisiae)	3
TL03055	chr11:66922227-66925952:A	5499	PPP1CA	protein phosphatase 1, catalytic subunit, alpha isoform	3
TL03060	chr11:66962093-66967839:A	57175	CORO1B	coronin, actin binding protein, 1B	3
TL03068	chr11:67130898-67136588:S	4723	NDUFV1	NADH dehydrogenase (ubiquinone) flavoprotein 1, 51kDa	3
TL03075	chr11:67554684-67560690:S	4728	NDUFS8	NADH dehydrogenase (ubiquinone) Fe-S protein 8, 23kDa (NADH-coenzyme Q reductase)	3
TL03088	chr11:68572925-68614648:S	219931	TPCN2	two pore segment channel 2	3
TL03244	chr11:101723175-101754611:S	329	BIRC2	baculoviral IAP repeat-containing 2	3
TL03278	chr11:107533327-107598575:A	4863	NPAT	nuclear protein, ataxia-telangiectasia locus	3
TL03364	chr11:117982422-118033951:S	23187	PHLDB1	pleckstrin homology-like domain, family B, member 1	3
TL03371	chr11:118374061-118391665:S	338657	CCDC84	coiled-coil domain containing 84	3
TL03380	chr11:118497497-118510975:S	25988	MIZF	MBD2-interacting zinc finger	3
TL03389	chr11:118732162-118757575:A	9099	USP2	ubiquitin specific peptidase 2	3
TL03456	chr11:129239574-129268114:A	4798	NFRKB	nuclear factor related to kappaB binding protein	3
TL03459	chr11:129534891-129585467:S	6768	ST14	suppression of tumorigenicity 14 (colon carcinoma)	3
TL03547	chr12:6846966-6850253:S	7167	TPI1	triosephosphate isomerase 1	3
TL03556	chr12:6955607-6996103:A	10162	MBOAT5	membrane bound O-acyltransferase domain containing 5	3
TL03684	chr12:25096507-25152536:S	4033	LRMP	lymphoid-restricted membrane protein	3
TL03728	chr12:37973296-38123185:A	55605	KIF21A	kinesin family member 21A	3
TL03753	chr12:45444810-45506002:A	55089	SLC38A4	solute carrier family 38, member 4	3
TL03765	chr12:46802814-46826154:S	5213	PFKM	phosphofructokinase, muscle	3
TL03775	chr12:47509805-47532224:A	9416	DDX23	DEAD (Asp-Glu-Ala-Asp) box polypeptide 23	3
TL03791	chr12:47975175-47978748:S	5630	PRPH	peripherin	3
TL03797	chr12:48238352-48248178:A	10445	MCRS1	microspherule protein 1	3
TL03800	chr12:48317990-48387464:A	91010	FMNL3	formin-like 3	3
TL03810	chr12:48765249-48780761:S	6602	SMARCD1	SWI/SNF related, matrix associated, actin dependent regulator of chromatin, subfamily d, member 1	3
TL03908	chr12:53177761-53223166:S	3071	NCKAP1L	NCK-associated protein 1-like	3
TL03909	chr12:53229670-53259290:S	5153	PDE1B	phosphodiesterase 1B, calmodulin-dependent	3
TL03935	chr12:54784369-54793961:S	5036	PA2G4	proliferation-associated 2G4, 38kDa	3
TL03987	chr12:56230113-56264821:S	3798	KIF5A	kinesin family member 5A	3
TL03992	chr12:56305817-56313252:A	2583	B4GALNT1	beta-1,4-N-acetyl-galactosaminyl transferase 1	3
TL03993	chr12:56374152-56401607:S	10956	OS9	amplified in osteosarcoma	3
TL04008	chr12:60940453-61086165:S	9958	USP15	ubiquitin specific peptidase 15	3
TL04022	chr12:63849637-63928374:S	23592	LEMD3	LEM domain containing 3	3
TL04095	chr12:86966920-87060124:A	80184	CEP290	centrosomal protein 290kDa	3
TL04116	chr12:93066629-93223356:S	10154	PLXNC1	plexin C1	3
TL04167	chr12:102505198-102684632:S	55576	STAB2	stabilin 2	3
TL04169	chr12:102848318-102865833:S	7184	HSP90B1	heat shock protein 90kDa beta (Grp94), member 1	3
TL04179	chr12:104025621-104087036:S	23325	KIAA1033	KIAA1033	3
TL04180	chr12:104091204-104154138:A	55198	APPL2	adaptor protein, phosphotyrosine interaction, PH domain and leucine zipper containing 2	3
TL04189	chr12:105909272-106011455:A	1407	CRY1	cryptochrome 1 (photolyase-like)	3
TL04191	chr12:106603719-106630387:S	11137	PWP1	PWP1 homolog (S. cerevisiae)	3
TL04220	chr12:109203414-109273280:S	488	ATP2A2	ATPase, Ca++ transporting, cardiac muscle, slow twitch 2	3
TL04253	chr12:112021700-112058404:A	8437	RASAL1	RAS protein activator like 1 (GAP1 like)	3
TL04258	chr12:112220953-112257308:A	80024	SLC24A6	solute carrier family 24 (sodium/potassium/calcium exchanger), member 6	3
TL04291	chr12:119118885-119123397:A	6175	RPLP0	ribosomal protein, large, P0	3
TL04292	chr12:119132639-119187892:A	5829	PXN	paxillin	3
TL04307	chr12:119647953-119662194:S	35	ACADS	acyl-Coenzyme A dehydrogenase, C-2 to C-3 short chain	3
TL04322	chr12:120761815-120781152:A	3242	HPD	4-hydroxyphenylpyruvate dioxygenase	3
TL04355	chr12:122684333-122711287:S	2967	GTF2H3	general transcription factor IIH, polypeptide 3, 34kDa	3
TL04427	chr13:24152694-24183918:S	479	ATP12A	ATPase, H+/K+ transporting, nongastric, alpha polypeptide	3
TL04429	chr13:24354411-24395085:A	55835	CENPJ	centromere protein J	3
TL04449	chr13:27475410-27572729:A	2322	FLT3	fms-related tyrosine kinase 3	3
TL04484	chr13:36481450-36531850:A	55578	FAM48A	family with sequence similarity 48, member A	3
TL04537	chr13:48448048-48681916:S	22862	FNDC3A	fibronectin type III domain containing 3A	3
TL04546	chr13:49171461-49265058:A	3839	KPNA3	karyopherin alpha 3 (importin alpha 4)	3
TL04560	chr13:51536900-51601215:A	341676	NEK5	NIMA (never in mitosis gene a)-related kinase 5	3
TL04666	chr13:112670757-112800863:S	23263	MCF2L	MCF.2 cell line derived transforming sequence-like	3
TL04691	chr14:19985055-19993038:A	55644	OSGEP	O-sialoglycoprotein endopeptidase	3
TL04722	chr14:22305570-22310607:S	5018	OXA1L	oxidase (cytochrome c) assembly 1-like	3
TL04735	chr14:22597615-22634663:A	22985	ACIN1	apoptotic chromatin condensation inducer 1	3
TL04748	chr14:23008737-23017242:S	25983	NGDN	neuroguidin, EIF4E binding protein	3
TL04760	chr14:23653860-23664291:S	80344	WDR23	WD repeat domain 23	3
TL04763	chr14:23678013-23680637:A	51016	C14orf122	chromosome 14 open reading frame 122	3
TL04772	chr14:23752997-23755081:A	145553	MDP-1	magnesium-dependent phosphatase 1	3
TL04774	chr14:23771487-23778287:S	51292	GMPR2	guanosine monophosphate reductase 2	3
TL04778	chr14:23829645-23838506:A	115817	DHRS1	dehydrogenase/reductase (SDR family) member 1	3
TL04785	chr14:23937831-23958334:S	57523	KIAA1305	KIAA1305	3
TL04880	chr14:52178354-52232169:A	30001	ERO1L	ERO1-like (S. cerevisiae)	3
TL04881	chr14:52243667-52264466:S	5706	PSMC6	proteasome (prosome, macropain) 26S subunit, ATPase, 6	3
TL04901	chr14:55116677-55221055:S	3895	KTN1	kinectin 1 (kinesin receptor)	3
TL04925	chr14:59972427-60022502:A	317761	C14orf39	chromosome 14 open reading frame 39	3
TL04943	chr14:63924845-63996474:S	4522	MTHFD1	methylenetetrahydrofolate dehydrogenase (NADP+ dependent) 1, methenyltetrahydrofolate cyclohydrolase, formyltetrahydrofolate synthetase	3
TL05020	chr14:74034638-74148787:A	4053	LTBP2	latent transforming growth factor beta binding protein 2	3
TL05021	chr14:74197707-74249560:A	9870	KIAA0317	KIAA0317	3
TL05143	chr14:95817347-95899431:A	55102	ATG2B	ATG2 autophagy related 2 homolog B (S. cerevisiae)	3
TL05166	chr14:101616827-101675839:A	3320	HSP90AA1	heat shock protein 90kDa alpha (cytosolic), class A member 1	3
TL05181	chr14:103055748-103058923:A	1152	CKB	creatine kinase, brain	3
TL05190	chr14:103464569-103588757:S	122402	TDRD9	tudor domain containing 9	3
TL05199	chr14:104402698-104434132:S	283638	KIAA0284	KIAA0284	3
TL05208	chr14:104786052-104788474:S	90135	BTBD6	BTB (POZ) domain containing 6	3
TL05212	chr14:105024593-105026169:S	1396	CRIP1	cysteine-rich protein 1 (intestinal)	3
TL05217	chr15:20287609-20296164:S	283767	LOC283767	FLJ40198 protein	3
TL05219	chr15:20444124-20555044:S	23191	CYFIP1	cytoplasmic FMR1 interacting protein 1	3
TL05225	chr15:23474952-23659442:A	57194	ATP10A	ATPase, class V, type 10A	3
TL05273	chr15:37660571-37676960:S	7057	THBS1	thrombospondin 1	3
TL05283	chr15:38410944-38420460:A	388115	C15orf52	chromosome 15 open reading frame 52	3
TL05295	chr15:38886565-38894059:S	84936	ZFYVE19	zinc finger, FYVE domain containing 19	3
TL05297	chr15:38923537-38937145:S	6692	SPINT1	serine peptidase inhibitor, Kunitz type 1	3
TL05309	chr15:39573413-39583039:S	3706	ITPKA	inositol 1,4,5-trisphosphate 3-kinase A	3
TL05320	chr15:40220688-40236102:A	255189	PLA2G4F	phospholipase A2, group IVF	3
TL05362	chr15:43172143-43193651:A	50506	DUOX2	dual oxidase 2	3
TL05365	chr15:43209483-43245066:S	53905	DUOX1	dual oxidase 1	3
TL05377	chr15:46218920-46257850:A	50804	MYEF2	myelin expression factor 2	3
TL05473	chr15:62894886-62904891:A	80119	PIF1	PIF1 5'-to-3' DNA helicase homolog (S. cerevisiae)	3
TL05559	chr15:72798942-72804930:A	1543	CYP1A1	cytochrome P450, family 1, subfamily A, polypeptide 1	3
TL05683	chr15:88529155-88573896:S	10509	SEMA4B	sema domain, immunoglobulin domain (Ig), transmembrane domain (TM) and short cytoplasmic domain, (semaphorin) 4B	3
TL05684	chr15:88574480-88578283:A	10519	CIB1	calcium and integrin binding 1 (calmyrin)	3
TL05689	chr15:88732476-88846479:S	8826	IQGAP1	IQ motif containing GTPase activating protein 1	3
TL05694	chr15:89248423-89266819:S	4122	MAN2A2	mannosidase, alpha, class 2A, member 2	3
TL05744	chr16:270606-273004:S	398	ARHGDIG	Rho GDP dissociation inhibitor (GDI) gamma	3
TL05783	chr16:1218336-1220186:A	64499	TPSB2	tryptase beta 2	3
TL05784	chr16:1230678-1232556:S	7177	TPSAB1	tryptase alpha/beta 1	3
TL05804	chr16:1766713-1772582:A	90864	SPSB3	splA/ryanodine receptor domain and SOCS box containing 3	3
TL05805	chr16:1772959-1779187:S	10101	NUBP2	nucleotide binding protein 2 (MinD homolog, E. coli)	3
TL05830	chr16:2199254-2201012:A	283870	C16orf79	chromosome 16 open reading frame 79	3
TL05838	chr16:2450115-2454965:S	80178	C16orf59	chromosome 16 open reading frame 59	3
TL05846	chr16:2742330-2761414:S	23524	SRRM2	serine/arginine repetitive matrix 2	3
TL05856	chr16:2962792-2970475:A	9088	PKMYT1	protein kinase, membrane associated tyrosine/threonine 1	3
TL05863	chr16:3055313-3059669:S	9235	IL32	interleukin 32	3
TL05899	chr16:4767674-4778348:A	124404	SEPT12	septin 12	3
TL05900	chr16:4786969-4792675:A	79641	ROGDI	rogdi homolog (Drosophila)	3
TL05903	chr16:4872508-4927137:A	5493	PPL	periplakin	3
TL05905	chr16:5014845-5023937:A	51172	NAGPA	N-acetylglucosamine-1-phosphodiester alpha-N-acetylglucosaminidase	3
TL05953	chr16:15595744-15644510:A	9665	KIAA0430	KIAA0430	3
TL06091	chr16:30275922-30289023:A	26000	TBC1D10B	TBC1 domain family, member 10B	3
TL06127	chr16:31098953-31110600:S	2521	FUS	fusion (involved in t(12;16) in malignant liposarcoma)	3
TL06153	chr16:46674384-46738182:A	94160	ABCC12	ATP-binding cassette, sub-family C (CFTR/MRP), member 12	3
TL06154	chr16:46758322-46826589:A	85320	ABCC11	ATP-binding cassette, sub-family C (CFTR/MRP), member 11	3
TL06171	chr16:51646445-51918915:S	80205	CHD9	chromodomain helicase DNA binding protein 9	3
TL06173	chr16:52082692-52094671:A	64400	AKTIP	AKT interacting protein	3
TL06223	chr16:56349629-56393940:A	3801	KIFC3	kinesin family member C3	3
TL06250	chr16:65394281-65422380:A	8883	NAE1	NEDD8 activating enzyme E1 subunit 1	3
TL06257	chr16:65552638-65566553:S	23491	CES3	carboxylesterase 3 (brain)	3
TL06280	chr16:66029417-66072590:A	9114	ATP6V0D1	ATPase, H+ transporting, lysosomal 38kDa, V0 subunit d1	3
TL06299	chr16:66531287-66535516:A	3931	LCAT	lecithin-cholesterol acyltransferase	3
TL06301	chr16:66567066-66571867:A	64180	DPEP3	dipeptidase 3	3
TL06302	chr16:66578798-66590857:A	64174	DPEP2	dipeptidase 2	3
TL06336	chr16:69045998-69071678:S	197258	FUK	fucokinase	3
TL06454	chr16:87397686-87403167:S	81620	CDT1	chromatin licensing and DNA replication factor 1	3
TL06472	chr16:88301041-88314895:A	9605	C16orf7	chromosome 16 open reading frame 7	3
TL06473	chr16:88314893-88334833:S	92822	ZNF276	zinc finger protein 276	3
TL06504	chr17:1592879-1605309:S	5345	SERPINF2	serpin peptidase inhibitor, clade F (alpha-2 antiplasmin, pigment epithelium derived factor), member 2	3
TL06513	chr17:2172731-2187428:A	55720	TSR1	TSR1, 20S rRNA accumulation, homolog (S. cerevisiae)	3
TL06514	chr17:2187555-2231098:S	9905	SGSM2	small G protein signaling modulator 2	3
TL06535	chr17:3854487-3993002:A	23140	ZZEF1	zinc finger, ZZ-type with EF-hand domain 1	3
TL06548	chr17:4590562-4596156:S	84225	ZMYND15	zinc finger, MYND-type containing 15	3
TL06560	chr17:4795130-4801148:S	2027	ENO3	enolase 3 (beta, muscle)	3
TL06562	chr17:4812016-4831655:A	23125	CAMTA2	calmodulin binding transcription activator 2	3
TL06593	chr17:6867092-6873685:S	255877	BCL6B	B-cell CLL/lymphoma 6, member B (zinc finger protein)	3
TL06595	chr17:6918579-6924324:A	10462	CLEC10A	C-type lectin domain family 10, member A	3
TL06604	chr17:7096095-7103983:S	23587	C17orf81	chromosome 17 open reading frame 81	3
TL06626	chr17:7406042-7416011:S	26168	SENP3	SUMO1/sentrin/SMT3 specific peptidase 3	3
TL06627	chr17:7416780-7423048:S	1973	EIF4A1	eukaryotic translation initiation factor 4A, isoform 1	3
TL06629	chr17:7427853-7432247:S	9526	MPDU1	mannose-P-dolichol utilization defect 1	3
TL06648	chr17:7883082-7893176:S	247	ALOX15B	arachidonate 15-lipoxygenase, type B	3
TL06758	chr17:19377758-19422938:S	55244	SLC47A1	solute carrier family 47, member 1	3
TL06787	chr17:23715416-23721500:A	645832|7448	SEBOX|VTN	SEBOX homeobox|vitronectin	3
TL06788	chr17:23723113-23752192:S	23098	SARM1	sterile alpha and TIR motif containing 1	3
TL06796	chr17:23959108-23965338:A	124923	FLJ25006	hypothetical protein FLJ25006	3
TL06804	chr17:24079958-24093911:S	284086	NEK8	NIMA (never in mitosis gene a)- related kinase 8	3
TL06805	chr17:24095149-24102103:S	9618	TRAF4	TNF receptor-associated factor 4	3
TL06818	chr17:24919864-24924301:S	90313	TP53I13	tumor protein p53 inducible protein 13	3
TL06836	chr17:26446120-26728821:S	4763	NF1	neurofibromin 1 (neurofibromatosis, von Recklinghausen disease, Watson disease)	3
TL06868	chr17:30482480-30493435:A	54475	NLE1	notchless homolog 1 (Drosophila)	3
TL06948	chr17:35390585-35407738:S	5709	PSMD3	proteasome (prosome, macropain) 26S subunit, non-ATPase, 3	3
TL06990	chr17:36992058-36996673:A	3861	KRT14	keratin 14 (epidermolysis bullosa simplex, Dowling-Meara, Koebner)	3
TL07019	chr17:37957509-37960757:S	3292	HSD17B1	hydroxysteroid (17-beta) dehydrogenase 1	3
TL07025	chr17:38064836-38072550:S	27175	TUBG2	tubulin, gamma 2	3
TL07026	chr17:38073458-38082495:A	79990	PLEKHH3	pleckstrin homology domain containing, family H (with MyTH4 domain) member 3	3
TL07040	chr17:38356068-38385546:A	80755	AARSD1	alanyl-tRNA synthetase domain containing 1	3
TL07043	chr17:38412350-38419999:S	3430	IFI35	interferon-induced protein 35	3
TL07057	chr17:39308252-39340639:A	4355	MPP2	membrane protein, palmitoylated 2 (MAGUK p55 subfamily member 2)	3
TL07086	chr17:40358973-40380608:A	146909	KIF18B	kinesin family member 18B	3
TL07090	chr17:40544533-40565417:A	113026	PLCD3	phospholipase C, delta 3	3
TL07176	chr17:45858517-45907199:S	80221	ACSF2	acyl-CoA synthetase family member 2	3
TL07213	chr17:53637796-53651665:A	54903	MKS1	Meckel syndrome, type 1	3
TL07215	chr17:53702215-53713295:A	4353	MPO	myeloperoxidase	3
TL07221	chr17:53952614-53964410:A	5414	SEPT4	septin 4	3
TL07249	chr17:57297512-57360159:A	57508	INTS2	integrator complex subunit 2	3
TL07342	chr17:70370213-70380751:A	2232	FDXR	ferredoxin reductase	3
TL07347	chr17:70458433-70480411:A	283987	C17orf28	chromosome 17 open reading frame 28	3
TL07357	chr17:70713191-70743449:S	79902	NUP85	nucleoporin 85kDa	3
TL07365	chr17:71024203-71032415:S	283989	TSEN54	tRNA splicing endonuclease 54 homolog (S. cerevisiae)	3
TL07370	chr17:71265612-71272875:A	2584	GALK1	galactokinase 1	3
TL07379	chr17:71449186-71487039:A	51	ACOX1	acyl-Coenzyme A oxidase 1, palmitoyl	3
TL07381	chr17:71508581-71513675:S	1018	CDK3	cyclin-dependent kinase 3	3
TL07410	chr17:73620593-73640083:A	11322	TMC6	transmembrane channel-like 6	3
TL07414	chr17:73695037-73715377:S	125061	AFMID	arylformamidase	3
TL07439	chr17:75928320-75984673:S	57674	RNF213	ring finger protein 213	3
TL07445	chr17:76705159-76721740:A	9625	AATK	apoptosis-associated tyrosine kinase	3
TL07453	chr17:77091593-77094422:A	71	ACTG1	actin, gamma 1	3
TL07462	chr17:77289775-77298447:S	1468	SLC25A10	solute carrier family 25 (mitochondrial carrier; dicarboxylate transporter), member 10	3
TL07517	chr18:2645885-2795015:S	23347	SMCHD1	structural maintenance of chromosomes flexible hinge domain containing 1	3
TL07520	chr18:3056804-3210106:A	8736	MYOM1	myomesin 1, 185kDa	3
TL07574	chr18:19337459-19365742:S	29919	C18orf8	chromosome 18 open reading frame 8	3
TL07680	chr18:53464656-53550037:A	5205	ATP8B1	ATPase, class I, type 8B, member 1	3
TL07695	chr18:58005503-58125335:S	57614	KIAA1468	KIAA1468	3
TL07724	chr18:69966725-69977184:S	29090	C18orf55	chromosome 18 open reading frame 55	3
TL07775	chr19:935327-945569:S	57418	WDR18	WD repeat domain 18	3
TL07789	chr19:1220346-1224169:S	1153	CIRBP	cold inducible RNA binding protein	3
TL07797	chr19:1401147-1424243:S	10297	APC2	adenomatosis polyposis coli 2	3
TL07801	chr19:1456022-1464019:A	339366	ADAMTSL5	ADAMTS-like 5	3
TL07820	chr19:2184154-2187328:A	55111	PLEKHJ1	pleckstrin homology domain containing, family J member 1	3
TL07821	chr19:2187815-2199678:S	8175	SF3A2	splicing factor 3a, subunit 2, 66kDa	3
TL07831	chr19:2379163-2407958:A	84823	LMNB2	lamin B2	3
TL07848	chr19:3136874-3160573:S	56926	NCLN	nicalin homolog (zebrafish)	3
TL07852	chr19:3473953-3489325:S	51343	FZR1	fizzy/cell division cycle 20 related 1 (Drosophila)	3
TL07853	chr19:3489262-3508571:A	126321	C19orf28	chromosome 19 open reading frame 28	3
TL07868	chr19:3927053-3936461:A	1938	EEF2	eukaryotic translation elongation factor 2	3
TL07869	chr19:3958748-3989067:S	51588	PIAS4	protein inhibitor of activated STAT, 4	3
TL07880	chr19:4275039-4289847:A	55620	STAP2	signal transducing adaptor family member 2	3
TL07881	chr19:4294575-4311075:S	84954	MPND	MPN domain containing	3
TL07884	chr19:4396260-4408790:A	80700	UBXD1	UBX domain containing 1	3
TL07889	chr19:4493599-4509503:A	10501	SEMA6B	sema domain, transmembrane domain (TM), and cytoplasmic domain, (semaphorin) 6B	3
TL07895	chr19:4860509-4913165:S	29128	UHRF1	ubiquitin-like, containing PHD and RING finger domains, 1	3
TL07898	chr19:5538009-5573938:A	9667	SAFB2	scaffold attachment factor B2	3
TL07901	chr19:5632034-5639533:S	374875	HSD11B1L	hydroxysteroid (11-beta) dehydrogenase 1-like	3
TL07905	chr19:5736152-5742190:A	56931	DUS3L	dihydrouridine synthase 3-like (S. cerevisiae)	3
TL07912	chr19:5865218-5866886:S	828	CAPS	calcyphosine	3
TL07936	chr19:6838581-6891464:S	2015	EMR1	egf-like module containing, mucin-like, hormone receptor-like 1	3
TL07945	chr19:7493511-7504863:S	57192	MCOLN1	mucolipin 1	3
TL07952	chr19:7647942-7650719:S	199675	C19orf59	chromosome 19 open reading frame 59	3
TL07981	chr19:8820519-8953018:A	94025	MUC16	mucin 16, cell surface associated	3
TL08008	chr19:10242516-10258291:S	3383	ICAM1	intercellular adhesion molecule 1 (CD54), human rhinovirus receptor	3
TL08013	chr19:10287888-10305314:A	125950	RAVER1	ribonucleoprotein, PTB-binding 1	3
TL08016	chr19:10362808-10375271:A	11140	CDC37	cell division cycle 37 homolog (S. cerevisiae)	3
TL08029	chr19:10843252-10894448:S	10498	CARM1	coactivator-associated arginine methyltransferase 1	3
TL08041	chr19:11318333-11327053:S	126075	LOC126075	hypothetical protein LOC126075	3
TL08044	chr19:11349474-11356019:A	2057	EPOR	erythropoietin receptor	3
TL08092	chr19:12847024-12853335:A	1777	DNASE2	deoxyribonuclease II, lysosomal	3
TL08105	chr19:13116223-13121987:A	8677	STX10	syntaxin 10	3
TL08122	chr19:14119548-14177997:A	22859	LPHN1	latrophilin 1	3
TL08131	chr19:14554895-14582951:S	388512	FLJ45910	FLJ45910 protein	3
TL08134	chr19:14704204-14750353:A	30817	EMR2	egf-like module containing, mucin-like, hormone receptor-like 2	3
TL08174	chr19:17073527-17185104:S	4650	MYO9B	myosin IXB	3
TL08185	chr19:17309363-17314530:S	84705	GTPBP3	GTP binding protein 3 (mitochondrial)	3
TL08188	chr19:17391911-17397140:S	93343	FAM125A	family with sequence similarity 125, member A	3
TL08206	chr19:18069602-18123499:S	23031	MAST3	microtubule associated serine/threonine kinase 3	3
TL08211	chr19:18179770-18220010:A	5143	PDE4C	phosphodiesterase 4C, cAMP-specific (phosphodiesterase E1 dunce homolog, Drosophila)	3
TL08229	chr19:18803743-18840039:S	5976	UPF1	UPF1 regulator of nonsense transcripts homolog (yeast)	3
TL08323	chr19:40298638-40307067:S	5349	FXYD3	FXYD domain containing ion transport regulator 3	3
TL08333	chr19:40511918-40530104:S	933	CD22	CD22 molecule	3
TL08342	chr19:40811819-40820427:S	79171	RBM42	RNA binding motif protein 42	3
TL08353	chr19:40940883-40951917:S	148137	C19orf55	chromosome 19 open reading frame 55	3
TL08357	chr19:41039649-41049888:S	84063	KIRREL2	kin of IRRE like 2 (Drosophila)	3
TL08359	chr19:41070982-41083392:A	84807	NFKBID	nuclear factor of kappa light polypeptide gene enhancer in B-cells inhibitor, delta	3
TL08365	chr19:41197402-41215615:A	25999	CLIP3	CAP-GLY domain containing linker protein 3	3
TL08368	chr19:41296450-41298046:A	5438	POLR2I	polymerase (RNA) II (DNA directed) polypeptide I, 14.5kDa	3
TL08370	chr19:41322757-41333095:S	826	CAPNS1	calpain, small subunit 1	3
TL08402	chr19:43394194-43406628:A	8193	DPF1	D4, zinc and double PHD fingers family 1	3
TL08406	chr19:43487583-43498446:A	90522	YIF1B	Yip1 interacting factor homolog B (S. cerevisiae)	3
TL08412	chr19:43585614-43591568:S	147965	FAM98C	family with sequence similarity 98, member C	3
TL08417	chr19:43830166-43913010:S	81	ACTN4	actinin, alpha 4	3
TL08424	chr19:44050311-44060734:A	126432	FLJ45909	FLJ45909 protein	3
TL08436	chr19:44450996-44452572:S	282616	IL28A	interleukin 28A (interferon, lambda 2)	3
TL08445	chr19:44615686-44618458:A	6217	RPS16	ribosomal protein S16	3
TL08449	chr19:44697592-44703166:S	348303	SELV	selenoprotein V	3
TL08454	chr19:45016937-45028813:A	2091	FBL	fibrillarin	3
TL08516	chr19:47426177-47438576:A	2931	GSK3A	glycogen synthase kinase 3 alpha	3
TL08581	chr19:50086333-50098777:S	10452	TOMM40	translocase of outer mitochondrial membrane 40 homolog (yeast)	3
TL08588	chr19:50234137-50266054:S	11129	SFRS16	splicing factor, arginine/serine-rich 16	3
TL08596	chr19:50535837-50546618:S	147700	KLC3	kinesin light chain 3	3
TL08607	chr19:50863341-50877557:S	2696	GIPR	gastric inhibitory polypeptide receptor	3
TL08612	chr19:50964815-50977655:A	1760	DMPK	dystrophia myotonica-protein kinase	3
TL08619	chr19:51190178-51213714:S	729440	CCDC61	coiled-coil domain containing 61	3
TL08632	chr19:51869412-51912224:A	25865	PRKD2	protein kinase D2	3
TL08643	chr19:52451631-52467050:S	26093	CCDC9	coiled-coil domain containing 9	3
TL08663	chr19:53491531-53499144:A	93233	CCDC114	coiled-coil domain containing 114	3
TL08671	chr19:53664423-53674457:S	9266	PSCD2	pleckstrin homology, Sec7 and coiled-coil domains 2 (cytohesin-2)	3
TL08686	chr19:53990130-54006113:A	587	BCAT2	branched chain aminotransferase 2, mitochondrial	3
TL08688	chr19:54032166-54063670:A	57664	PLEKHA4	pleckstrin homology domain containing, family A (phosphoinositide binding specific) member 4	3
TL08696	chr19:54188967-54210994:S	10856	RUVBL2	RuvB-like 2 (E. coli)	3
TL08706	chr19:54280276-54303682:S	6625	SNRP70	small nuclear ribonucleoprotein 70kDa polypeptide (RNP antigen)	3
TL08725	chr19:54750779-54775615:A	51070	NOSIP	nitric oxide synthase interacting protein	3
TL08728	chr19:54830363-54835212:A	6237	RRAS	related RAS viral (r-ras) oncogene homolog	3
TL08737	chr19:55001960-55008280:A	80199	FUZ	fuzzy homolog (Drosophila)	3
TL08752	chr19:55571496-55578079:S	7376	NR1H2	nuclear receptor subfamily 1, group H, member 2	3
TL08759	chr19:55706668-55709759:A	554235	LOC554235	hypothetical protein LOC554235	3
TL08771	chr19:56138370-56148156:A	25818	KLK5	kallikrein-related peptidase 5	3
TL08789	chr19:56566685-56567772:A	4818	NKG7	natural killer cell group 7 sequence	3
TL08798	chr19:56837617-56841944:A	100049587	SIGLEC14	sialic acid binding Ig-like lectin 14	3
TL08840	chr19:59077278-59102713:S	5582	PRKCG	protein kinase C, gamma	3
TL08844	chr19:59235891-59259019:A	284415	VSTM1	V-set and transmembrane domain containing 1	3
TL08848	chr19:59310648-59326954:S	26121	PRPF31	PRP31 pre-mRNA processing factor 31 homolog (S. cerevisiae)	3
TL08855	chr19:59411958-59418771:A	11025	LILRB3	leukocyte immunoglobulin-like receptor, subfamily B (with TM and ITIM domains), member 3	3
TL08870	chr19:59820440-59840816:S	10859	LILRB1	leukocyte immunoglobulin-like receptor, subfamily B (with TM and ITIM domains), member 1	3
TL08871	chr19:59865935-59871658:S	11006	LILRB4	leukocyte immunoglobulin-like receptor, subfamily B (with TM and ITIM domains), member 4	3
TL08886	chr19:60361842-60369830:A	352909	C19orf51	chromosome 19 open reading frame 51	3
TL08888	chr19:60384427-60412654:A	5794	PTPRH	protein tyrosine phosphatase, receptor type, H	3
TL08897	chr19:60580015-60581424:S	147744	TMEM190	transmembrane protein 190	3
TL08986	chr19:63754744-63758298:A	27243	CHMP2A	chromatin modifying protein 2A	3
TL08987	chr19:63758890-63762155:A	9040	UBE2M	ubiquitin-conjugating enzyme E2M (UBC12 homolog, yeast)	3
TL09033	chr2:11239228-11402162:A	9475	ROCK2	Rho-associated, coiled-coil containing protein kinase 2	3
TL09041	chr2:15649220-15688676:S	1653	DDX1	DEAD (Asp-Glu-Ala-Asp) box polypeptide 1	3
TL09061	chr2:21077805-21120450:A	338	APOB	apolipoprotein B (including Ag(x) antigen)	3
TL09100	chr2:27176972-27195475:A	10669	CGREF1	cell growth regulator with EF-hand domain 1	3
TL09101	chr2:27200160-27207184:S	84696	ABHD1	abhydrolase domain containing 1	3
TL09110	chr2:27359103-27383811:S	57159	TRIM54	tripartite motif-containing 54	3
TL09155	chr2:32435599-32697469:S	57448	BIRC6	baculoviral IAP repeat-containing 6 (apollon)	3
TL09198	chr2:43919606-43959109:S	64241	ABCG8	ATP-binding cassette, sub-family G (WHITE), member 8 (sterolin 2)	3
TL09258	chr2:61558572-61618922:A	7514	XPO1	exportin 1 (CRM1 homolog, yeast)	3
TL09347	chr2:74502392-74506390:S	84058	WDR54	WD repeat domain 54	3
TL09358	chr2:74598765-74606916:A	165545	DQX1	DEAQ box polypeptide 1 (RNA-dependent ATPase)	3
TL09360	chr2:74610039-74614191:S	27429	HTRA2	HtrA serine peptidase 2	3
TL09401	chr2:86106961-86186789:A	25885	POLR1A	polymerase (RNA) I polypeptide A, 194kDa	3
TL09449	chr2:96867377-96873485:A	200539	ANKRD23	ankyrin repeat domain 23	3
TL09513	chr2:108702368-108768699:S	5903	RANBP2	RAN binding protein 2	3
TL09526	chr2:112243109-112358212:A	64682	ANAPC1	anaphase promoting complex subunit 1	3
TL09552	chr2:114916368-116318406:S	57628	DPP10	dipeptidyl-peptidase 10	3
TL09557	chr2:119416214-119468706:S	8685	MARCO	macrophage receptor with collagenous structure	3
TL09566	chr2:120233676-120451507:S	5775	PTPN4	protein tyrosine phosphatase, non-receptor type 4 (megakaryocyte)	3
TL09594	chr2:130625449-130656164:A	55627	SMPD4	sphingomyelin phosphodiesterase 4, neutral membrane (neutral sphingomyelinase-3)	3
TL09620	chr2:135526322-135644016:S	22930	RAB3GAP1	RAB3 GTPase activating protein subunit 1 (catalytic)	3
TL09649	chr2:151974673-152040665:S	55183	RIF1	RAP1 interacting factor homolog (yeast)	3
TL09655	chr2:153216352-153282221:A	55660	PRPF40A	PRP40 pre-mRNA processing factor 40 homolog A (S. cerevisiae)	3
TL09717	chr2:170363634-170376821:S	6741	SSB	Sjogren syndrome antigen B (autoantigen La)	3
TL09719	chr2:170392263-170648885:S	130507	UBR3	ubiquitin protein ligase E3 component n-recognin 3	3
TL09774	chr2:180517848-180580025:A	57703	KIAA1604	KIAA1604 protein	3
TL09935	chr2:218837095-218843137:A	14	AAMP	angio-associated, migratory cell protein	3
TL09947	chr2:219236830-219245025:A	64320	RNF25	ring finger protein 25	3
TL09956	chr2:219575819-219614489:A	255101	CCDC108	coiled-coil domain containing 108	3
TL09959	chr2:219734424-219743030:A	151295	SLC23A3	solute carrier family 23 (nucleobase transporters), member 3	3
TL09962	chr2:219779781-219782614:S	130617	ZFAND2B	zinc finger, AN1-type domain 2B	3
TL09967	chr2:219818435-219821873:S	8576	STK16	serine/threonine kinase 16	3
TL09970	chr2:219862588-219882387:A	5798	PTPRN	protein tyrosine phosphatase, receptor type, N	3
TL10002	chr2:227737524-227887751:S	1285	COL4A3	collagen, type IV, alpha 3 (Goodpasture antigen)	3
TL10013	chr2:230340173-230494899:A	9320	TRIP12	thyroid hormone receptor interactor 12	3
TL10039	chr2:233099165-233108449:S	1144	CHRND	cholinergic receptor, nicotinic, delta	3
TL10043	chr2:233270258-233433531:S	26058	GIGYF2	GRB10 interacting GYF protein 2	3
TL10068	chr2:238372126-238408253:S	375316	RBM44	RNA binding motif protein 44	3
TL10098	chr2:241815351-241903927:A	3069	HDLBP	high density lipoprotein binding protein (vigilin)	3
TL10153	chr20:2763970-2769332:A	64773	FAM113A	family with sequence similarity 113, member A	3
TL10223	chr20:17542322-17610928:A	6238	RRBP1	ribosome binding protein 1 homolog 180kDa (dog)	3
TL10294	chr20:30160969-30218722:S	9777	TM9SF4	transmembrane 9 superfamily protein member 4	3
TL10396	chr20:41576466-41603949:S	26013	L3MBTL	l(3)mbt-like (Drosophila)	3
TL10450	chr20:43952997-43960865:S	5476	CTSA	cathepsin A	3
TL10460	chr20:44428096-44468678:A	63916	ELMO2	engulfment and cell motility 2	3
TL10565	chr20:61394982-61432729:S	57642	COL20A1	collagen, type XX, alpha 1	3
TL10579	chr20:61838421-61840904:S	54923	LIME1	Lck interacting transmembrane adaptor 1	3
TL10662	chr21:36458708-36588442:S	9980	DOPEY2	dopey family member 2	3
TL10680	chr21:39479273-39607426:A	54014	BRWD1	bromodomain and WD repeat domain containing 1	3
TL10772	chr22:17280294-17304066:A	5625	PRODH	proline dehydrogenase (oxidase) 1	3
TL10776	chr22:17543094-17546285:A	6576	SLC25A1	solute carrier family 25 (mitochondrial carrier; citrate transporter), member 1	3
TL10837	chr22:22445035-22456503:S	4320	MMP11	matrix metallopeptidase 11 (stromelysin 3)	3
TL10855	chr22:23309717-23354972:S	2678	GGT1	gamma-glutamyltransferase 1	3
TL10902	chr22:29011106-29015502:A	652968	LOC652968	hypothetical protein LOC652968	3
TL10906	chr22:29104801-29113302:A	200312	RNF215	ring finger protein 215	3
TL10907	chr22:29122932-29149828:S	23541	SEC14L2	SEC14-like 2 (S. cerevisiae)	3
TL10910	chr22:29214899-29231682:A	284904	SEC14L4	SEC14-like 4 (S. cerevisiae)	3
TL10916	chr22:29420792-29633811:S	23762	OSBP2	oxysterol binding protein 2	3
TL10920	chr22:29848960-29860683:S	27124	PIB5PA	phosphatidylinositol (4,5) bisphosphate 5-phosphatase, A	3
TL10959	chr22:35007271-35113927:A	4627	MYH9	myosin, heavy chain 9, non-muscle	3
TL11122	chr22:48682857-48698110:A	79087	ALG12	asparagine-linked glycosylation 12 homolog (S. cerevisiae, alpha-1,6-mannosyltransferase)	3
TL11125	chr22:48775068-48793182:A	400935	IL17REL	interleukin 17 receptor E-like	3
TL11144	chr22:49311047-49315380:A	1890	TYMP	thymidine phosphorylase	3
TL11218	chr3:13332736-13436809:A	23225	NUP210	nucleoporin 210kDa	3
TL11267	chr3:27127397-27307885:A	152110	NEK10	NIMA (never in mitosis gene a)- related kinase 10	3
TL11393	chr3:46874360-46879977:A	4634	MYL3	myosin, light chain 3, alkali; ventricular, skeletal, slow	3
TL11434	chr3:49032911-49035930:S	25915	C3orf60	chromosome 3 open reading frame 60	3
TL11449	chr3:49429214-49435016:A	275	AMT	aminomethyltransferase	3
TL11462	chr3:49870425-49882373:A	79012	CAMKV	CaM kinase-like vesicle-associated	3
TL11466	chr3:50101371-50131396:S	10181	RBM5	RNA binding motif protein 5	3
TL11525	chr3:52786647-52801117:S	3697	ITIH1	inter-alpha (globulin) inhibitor H1	3
TL11535	chr3:53504115-53821001:S	776	CACNA1D	calcium channel, voltage-dependent, L type, alpha 1D subunit	3
TL11555	chr3:57586224-57653844:A	201627	FAM116A	family with sequence similarity 116, member A	3
TL11562	chr3:58388393-58394605:A	5162	PDHB	pyruvate dehydrogenase (lipoamide) beta	3
TL11647	chr3:103029546-103062556:S	64332	NFKBIZ	nuclear factor of kappa light polypeptide gene enhancer in B-cells inhibitor, zeta	3
TL11768	chr3:127596471-127638088:S	348807	CCDC37	coiled-coil domain containing 37	3
TL11826	chr3:134802176-134863380:A	11073	TOPBP1	topoisomerase (DNA) II binding protein 1	3
TL11890	chr3:150028277-150060662:S	1360	CPB1	carboxypeptidase B1 (tissue)	3
TL11923	chr3:155476150-155524980:A	170506	DHX36	DEAH (Asp-Glu-Ala-His) box polypeptide 36	3
TL11934	chr3:158348279-158361176:A	57018	CCNL1	cyclin L1	3
TL11951	chr3:161700655-161766070:A	3840	KPNA4	karyopherin alpha 4 (importin alpha 3)	3
TL12022	chr3:185120417-185218421:A	10057	ABCC5	ATP-binding cassette, sub-family C (CFTR/MRP), member 5	3
TL12026	chr3:185335503-185345793:S	8893	EIF2B5	eukaryotic translation initiation factor 2B, subunit 5 epsilon, 82kDa	3
TL12027	chr3:185355977-185374008:S	1857	DVL3	dishevelled, dsh homolog 3 (Drosophila)	3
TL12028	chr3:185375327-185384573:S	1173	AP2M1	adaptor-related protein complex 2, mu 1 subunit	3
TL12030	chr3:185442810-185449440:A	10195	ALG3	asparagine-linked glycosylation 3 homolog (S. cerevisiae, alpha-1,3-mannosyltransferase)	3
TL12051	chr3:187246803-187309571:A	2119	ETV5	ets variant gene 5 (ets-related molecule)	3
TL12087	chr3:194793805-194898009:S	4976	OPA1	optic atrophy 1 (autosomal dominant)	3
TL12153	chr4:1693063-1716695:S	10460	TACC3	transforming, acidic coiled-coil containing protein 3	3
TL12270	chr4:38860418-38963825:S	57728	WDR19	WD repeat domain 19	3
TL12271	chr4:38965470-39044390:A	5981	RFC1	replication factor C (activator 1) 1, 145kDa	3
TL12330	chr4:55218851-55301638:S	3815	KIT	v-kit Hardy-Zuckerman 4 feline sarcoma viral oncogene homolog	3
TL12343	chr4:57028518-57064604:S	6731	SRP72	signal recognition particle 72kDa	3
TL12349	chr4:57539865-57592091:S	5431	POLR2B	polymerase (RNA) II (DNA directed) polypeptide B, 140kDa	3
TL12391	chr4:71492589-71507593:S	258	AMBN	ameloblastin (enamel matrix protein)	3
TL12624	chr4:129021494-129039802:S	10733	PLK4	polo-like kinase 4 (Drosophila)	3
TL12720	chr4:160408447-160500751:S	9693	RAPGEF2	Rap guanine nucleotide exchange factor (GEF) 2	3
TL12859	chr5:16715015-16989385:A	4651	MYO10	myosin X	3
TL12875	chr5:33476654-33503953:S	6897	TARS	threonyl-tRNA synthetase	3
TL12905	chr5:38973779-39110258:A	253260	RICTOR	rapamycin-insensitive companion of mTOR	3
TL12915	chr5:41033878-41107201:A	133558	FLJ40243	hypothetical protein FLJ40243	3
TL12999	chr5:68700879-68746384:S	5884	RAD17	RAD17 homolog (S. pombe)	3
TL13086	chr5:89890372-90495789:S	84059	GPR98	G protein-coupled receptor 98	3
TL13116	chr5:102493155-102566808:S	23262	HISPPD1	histidine acid phosphatase domain containing 1	3
TL13136	chr5:112877308-112958880:S	64848	YTHDC2	YTH domain containing 2	3
TL13186	chr5:131424245-131426795:S	3562	IL3	interleukin 3 (colony-stimulating factor, multiple)	3
TL13259	chr5:138730787-138746900:A	9963	SLC23A1	solute carrier family 23 (nucleobase transporters), member 1	3
TL13278	chr5:140007567-140022249:S	3550	IK	IK cytokine, down-regulator of HLA II	3
TL13282	chr5:140051201-140059074:S	23438	HARS2	histidyl-tRNA synthetase 2, mitochondrial (putative)	3
TL13345	chr5:149717427-149760064:S	6949	TCOF1	Treacher Collins-Franceschetti syndrome 1	3
TL13415	chr5:162820240-162851525:S	3161	HMMR	hyaluronan-mediated motility receptor (RHAMM)	3
TL13423	chr5:168996870-169442959:S	1794	DOCK2	dedicator of cytokinesis 2	3
TL13426	chr5:169607665-169657400:A	3937	LCP2	lymphocyte cytosolic protein 2 (SH2 domain containing leukocyte protein of 76kDa)	3
TL13462	chr5:175886305-175897027:A	22838	RNF44	ring finger protein 44	3
TL13485	chr5:176863356-176869459:A	79930	DOK3	docking protein 3	3
TL13494	chr5:177490633-177508085:S	64777	RMND5B	required for meiotic nuclear division 5 homolog B (S. cerevisiae)	3
TL13631	chr6:25862944-25888419:S	10050	SLC17A4	solute carrier family 17 (sodium phosphate), member 4	3
TL13632	chr6:25891104-25940266:A	6568	SLC17A1	solute carrier family 17 (sodium phosphate), member 1	3
TL13675	chr6:30018309-30021633:S	3105	HLA-A	major histocompatibility complex, class I, A	3
TL13688	chr6:30565249-30569072:S	3133	HLA-E	major histocompatibility complex, class I, E	3
TL13689	chr6:30621672-30632987:A	2794	GNL1	guanine nucleotide binding protein-like 1	3
TL13701	chr6:30803489-30818432:A	10211	FLOT1	flotillin 1	3
TL13717	chr6:31344507-31347834:A	3107	HLA-C	major histocompatibility complex, class I, C	3
TL13718	chr6:31429627-31432914:A	3106	HLA-B	major histocompatibility complex, class I, B	3
TL13759	chr6:32027842-32034843:A	7936	RDBP	RD RNA binding protein	3
TL13762	chr6:32047624-32057202:S	8859	STK19	serine/threonine kinase 19	3
TL13774	chr6:32260487-32265941:A	5089	PBX2	pre-B-cell leukemia homeobox 2	3
TL13798	chr6:33276580-33280192:S	7922	SLC39A7	solute carrier family 39 (zinc transporter), member 7	3
TL13802	chr6:33347829-33352264:S	6222|730754	RP5-1033B10.18|RPS18	ribosomal protein S18|similar to ribosomal protein S18	3
TL13805	chr6:33375449-33389967:A	6892	TAPBP	TAP binding protein (tapasin)	3
TL13829	chr6:34867771-34953270:S	54887	UHRF1BP1	UHRF1 (ICBP90) binding protein 1	3
TL13848	chr6:36019270-36100355:A	116369	SLC26A8	solute carrier family 26, member 8	3
TL13850	chr6:36206239-36215820:S	5603	MAPK13	mitogen-activated protein kinase 13	3
TL13866	chr6:37245963-37251182:S	5292	PIM1	pim-1 oncogene	3
TL13897	chr6:41622141-41678100:S	116113	FOXP4	forkhead box P4	3
TL13912	chr6:42640035-42766889:S	23304	UBR2	ubiquitin protein ligase E3 component n-recognin 2	3
TL13933	chr6:43381188-43384508:A	401262	CRIP3	cysteine-rich protein 3	3
TL13940	chr6:43592768-43605092:S	9533	POLR1C	polymerase (RNA) I polypeptide C, 30kDa	3
TL13950	chr6:44203353-44231234:S	55362	TMEM63B	transmembrane protein 63B	3
TL14008	chr6:53470098-53517790:A	2729	GCLC	glutamate-cysteine ligase, catalytic subunit	3
TL14071	chr6:83834103-83934846:S	23033	DOPEY1	dopey family member 1	3
TL14453	chr7:5533304-5536758:A	60	ACTB	actin, beta	3
TL14466	chr7:6415284-6454110:A	221955	DAGLB	diacylglycerol lipase, beta	3
TL14531	chr7:26196080-26206938:A	3181	HNRNPA2B1	heterogeneous nuclear ribonucleoprotein A2/B1	3
TL14620	chr7:44078371-44088607:A	27434	POLM	polymerase (DNA directed), mu	3
TL14633	chr7:44755054-44776004:S	83637	ZMIZ2	zinc finger, MIZ-type containing 2	3
TL14636	chr7:44968785-44985193:A	64005	MYO1G	myosin IG	3
TL14738	chr7:75669151-75754541:S	222183	FLJ37078	hypothetical protein FLJ37078	3
TL14872	chr7:99870847-99872030:A	221908	C7orf47	chromosome 7 open reading frame 47	3
TL14889	chr7:100288293-100302570:S	56996	SLC12A9	solute carrier family 12 (potassium/chloride transporters), member 9	3
TL14922	chr7:102740156-102772556:A	27000	ZRF1	zuotin related factor 1	3
TL14928	chr7:104441872-104541768:S	55904	MLL5	myeloid/lymphoid or mixed-lineage leukemia 5 (trithorax homolog, Drosophila)	3
TL14931	chr7:104959767-104995360:S	60561	RINT1	RAD50 interactor 1	3
TL14958	chr7:111850461-111903482:S	3475	IFRD1	interferon-related developmental regulator 1	3
TL14987	chr7:121503422-121561112:A	10157	AASS	aminoadipate-semialdehyde synthase	3
TL15100	chr7:142262913-142278969:S	2051	EPHB6	EPH receptor B6	3
TL15112	chr7:142798326-142816107:A	2041	EPHA1	EPH receptor A1	3
TL15175	chr7:151462942-151764023:A	58508	MLL3	myeloid/lymphoid or mixed-lineage leukemia 3	3
TL15288	chr8:21938299-21950354:S	10361	NPM2	nucleophosmin/nucleoplasmin, 2	3
TL15291	chr8:22002659-22017836:S	64760	RAI16	retinoic acid induced 16	3
TL15293	chr8:22027876-22043975:A	55806	HR	hairless homolog (mouse)	3
TL15294	chr8:22051477-22055393:A	80346	REEP4	receptor accessory protein 4	3
TL15393	chr8:38387812-38445509:A	2260	FGFR1	fibroblast growth factor receptor 1 (fms-related tyrosine kinase 2, Pfeiffer syndrome)	3
TL15432	chr8:49036046-49052621:S	4173	MCM4	minichromosome maintenance complex component 4	3
TL15442	chr8:53697570-53789579:A	9821	RB1CC1	RB1-inducible coiled-coil 1	3
TL15469	chr8:61753892-61942019:S	55636	CHD7	chromodomain helicase DNA binding protein 7	3
TL15489	chr8:67948883-67976568:S	157777	C8orf45	chromosome 8 open reading frame 45	3
TL15563	chr8:91140013-91164283:A	793	CALB1	calbindin 1, 28kDa	3
TL15578	chr8:95722577-95788870:S	54845	RBM35A	RNA binding motif protein 35A	3
TL15746	chr8:144522399-144537533:S	114822	RHPN1	rhophilin, Rho GTPase binding protein 1	3
TL15753	chr8:144765932-144770039:A	7264	TSTA3	tissue specific transplantation antigen P35B	3
TL15791	chr8:145705359-145707397:S	113655	MFSD3	major facilitator superfamily domain containing 3	3
TL15814	chr9:2611792-2644485:S	7436	VLDLR	very low density lipoprotein receptor	3
TL15901	chr9:33911690-34038947:A	55833	UBAP2	ubiquitin associated protein 2	3
TL15916	chr9:34636634-34640573:S	2592	GALT	galactose-1-phosphate uridylyltransferase	3
TL15917	chr9:34643931-34651884:S	3590	IL11RA	interleukin 11 receptor, alpha	3
TL15920	chr9:34699001-34700147:A	6366	CCL21	chemokine (C-C motif) ligand 21	3
TL15925	chr9:35063834-35070013:A	2189	FANCG	Fanconi anemia, complementation group G	3
TL15929	chr9:35151988-35395332:S	10497	UNC13B	unc-13 homolog B (C. elegans)	3
TL15930	chr9:35480123-35551889:S	9853	RUSC2	RUN and SH3 domain containing 2	3
TL15935	chr9:35648310-35651184:S	203260	CCDC107	coiled-coil domain containing 107	3
TL15946	chr9:35802956-35805042:A	84681	HINT2	histidine triad nucleotide binding protein 2	3
TL16152	chr9:110669620-110736217:A	8518	IKBKAP	inhibitor of kappa light polypeptide gene enhancer in B-cells, kinase complex-associated protein	3
TL16154	chr9:110744671-110815585:A	8727	CTNNAL1	catenin (cadherin-associated protein), alpha-like 1	3
TL16220	chr9:122890394-122979707:S	11064	CEP110	centrosomal protein 110kDa	3
TL16233	chr9:124651552-124707383:A	54542	RC3H2	ring finger and CCCH-type zinc finger domains 2	3
TL16253	chr9:127036952-127043430:A	3309	HSPA5	heat shock 70kDa protein 5 (glucose-regulated protein, 78kDa)	3
TL16283	chr9:129742681-129782316:A	399665	FAM102A	family with sequence similarity 102, member A	3
TL16285	chr9:129870299-129911345:S	114789	SLC25A25	solute carrier family 25 (mitochondrial carrier; phosphate carrier), member 25	3
TL16311	chr9:130722994-130744141:S	254295	PHYHD1	phytanoyl-CoA dioxygenase domain containing 1	3
TL16372	chr9:135276940-135314328:S	11093	ADAMTS13	ADAM metallopeptidase with thrombospondin type 1 motif, 13	3
TL16406	chr9:138378228-138387939:A	64170	CARD9	caspase recruitment domain family, member 9	3
TL16421	chr9:138810622-138822014:S	84960	KIAA1984	KIAA1984	3
TL16428	chr9:138959518-138961247:S	733	C8G	complement component 8, gamma polypeptide	3
TL16438	chr9:139062373-139068326:A	954	ENTPD2	ectonucleoside triphosphate diphosphohydrolase 2	3
TL16453	chr9:139265550-139267755:S	441476	LOC441476	hypothetical protein LOC441476	3
TL16565	chrX:23711224-23714248:S	6303	SAT1	spermidine/spermine N1-acetyltransferase 1	3
TL16660	chrX:48427152-48434759:S	7454	WAS	Wiskott-Aldrich syndrome (eczema-thrombocytopenia)	3
TL16670	chrX:48664431-48699837:A	55593	OTUD5	OTU domain containing 5	3
TL16677	chrX:48857288-48867023:A	27238	GPKOW	G patch domain and KOW motifs	3
TL16727	chrX:53128286-53134447:S	64061	TSPYL2	TSPY-like 2	3
TL16738	chrX:54488611-54539324:A	2245	FGD1	FYVE, RhoGEF and PH domain containing 1 (faciogenital dysplasia)	3
TL16741	chrX:54850895-54859170:S	10916	MAGED2	melanoma antigen family D, 2	3
TL16784	chrX:69426619-69557461:S	24137	KIF4A	kinesin family member 4A	3
TL16788	chrX:70062154-70067684:A	84889	SLC7A3	solute carrier family 7 (cationic amino acid transporter, y+ system), member 3	3
TL16799	chrX:70502838-70601025:S	6872	TAF1	TAF1 RNA polymerase II, TATA box binding protein (TBP)-associated factor, 250kDa	3
TL16800	chrX:70669657-70712465:S	8473	OGT	O-linked N-acetylglucosamine (GlcNAc) transferase (UDP-N-acetylglucosamine:polypeptide-N-acetylglucosaminyl transferase)	3
TL16835	chrX:79818338-79951889:A	254065	BRWD3	bromodomain and WD repeat domain containing 3	3
TL16952	chrX:114251438-114374891:A	57631	LRCH2	leucine-rich repeats and calponin homology (CH) domain containing 2	3
TL16998	chrX:122562092-122694585:A	57187	THOC2	THO complex 2	3
TL17010	chrX:128867839-128891409:S	10813	UTP14A	UTP14, U3 small nucleolar ribonucleoprotein, homolog A (yeast)	3
TL17020	chrX:130235160-130250936:A	3547	IGSF1	immunoglobulin superfamily, member 1	3
TL17021	chrX:130984925-131037652:S	51765	RP6-213H19.1	serine/threonine protein kinase MST4	3
TL17131	chrX:152643529-152663374:S	215	ABCD1	ATP-binding cassette, sub-family D (ALD), member 1	3
TL17134	chrX:152704414-152713161:A	3421	IDH3G	isocitrate dehydrogenase 3 (NAD+) gamma	3
TL17145	chrX:152929150-152938536:A	3654	IRAK1	interleukin-1 receptor-associated kinase 1	3
TL17153	chrX:153260980-153263075:S	2010	EMD	emerin (Emery-Dreifuss muscular dystrophy)	3
TL17156	chrX:153293070-153303257:S	6901	TAZ	tafazzin (cardiomyopathy, dilated 3A (X-linked); endocardial fibroelastosis 2; Barth syndrome)	3
TL17175	chrX:153943093-153952830:A	4515	MTCP1	mature T-cell proliferation 1	3
TL17199	chrY:6174263-6177053:S	64591	TSPY2	testis specific protein, Y-linked 2	3
TL17203	chrY:9914563-9917358:S	7258	TSPY1	testis specific protein, Y-linked 1	3
TL17204	chrY:9934894-9937527:S	728137	LOC728137	similar to testis specific protein, Y-linked 1	3
TL00009	chr1:1104939-1111104:S	254173	TTLL10	tubulin tyrosine ligase-like family, member 10	2
TL00011	chr1:1136568-1139375:A	7293	TNFRSF4	tumor necrosis factor receptor superfamily, member 4	2
TL00017	chr1:1233856-1236920:S	126789	PUSL1	pseudouridylate synthase-like 1	2
TL00024	chr1:1310953-1324553:A	81669	CCNL2	cyclin L2	2
TL00041	chr1:1843255-1849228:A	339457	C1orf222	chromosome 1 open reading frame 222	2
TL00050	chr1:2397613-2426824:S	9651	PLCH2	phospholipase C, eta 2	2
TL00052	chr1:2450043-2451544:A	388585	HES5	hairy and enhancer of split 5 (Drosophila)	2
TL00054	chr1:2508108-2512762:S	127281	C1orf93	chromosome 1 open reading frame 93	2
TL00075	chr1:6226848-6228225:S	390992	HES3	hairy and enhancer of split 3 (Drosophila)	2
TL00078	chr1:6397882-6402566:A	54626	HES2	hairy and enhancer of split 2 (Drosophila)	2
TL00080	chr1:6443800-6448842:A	8718	TNFRSF25	tumor necrosis factor receptor superfamily, member 25	2
TL00084	chr1:6562697-6571926:S	3104	ZBTB48	zinc finger and BTB domain containing 48	2
TL00124	chr1:11037235-11042678:A	6723	SRM	spermidine synthase	2
TL00137	chr1:11788793-11825788:S	1185	CLCN6	chloride channel 6	2
TL00142	chr1:11962955-11996152:S	9927	MFN2	mitofusin 2	2
TL00143	chr1:12002098-12014693:S	60672	RP5-1077B9.4	invasion inhibitory protein 45	2
TL00185	chr1:15880612-15933851:S	23207	PLEKHM2	pleckstrin homology domain containing, family M (with RUN domain) member 2	2
TL00193	chr1:16221072-16233132:S	1187	CLCNKA	chloride channel Ka	2
TL00194	chr1:16242833-16256390:S	1188	CLCNKB	chloride channel Kb	2
TL00208	chr1:17404207-17445088:S	29943	PADI1	peptidyl arginine deiminase, type I	2
TL00209	chr1:17448179-17483314:S	51702	PADI3	peptidyl arginine deiminase, type III	2
TL00260	chr1:22762590-22802674:S	2046	EPHA8	EPH receptor A8	2
TL00340	chr1:27541099-27553008:S	84958	SYTL1	synaptotagmin-like 1	2
TL00347	chr1:27811387-27834314:A	2268	FGR	Gardner-Rasheed feline sarcoma viral (v-fgr) oncogene homolog	2
TL00402	chr1:32530294-32571811:S	3065	HDAC1	histone deacetylase 1	2
TL00410	chr1:32980098-33013158:S	57648	KIAA1522	KIAA1522	2
TL00418	chr1:33319300-33358582:S	113451	ADC	arginine decarboxylase	2
TL00442	chr1:35974404-36008138:A	63967	CLSPN	claspin homolog (Xenopus laevis)	2
TL00444	chr1:36121396-36162486:S	26523	EIF2C1	eukaryotic translation initiation factor 2C, 1	2
TL00452	chr1:36545304-36563073:S	79729	C1orf113	chromosome 1 open reading frame 113	2
TL00467	chr1:37930745-37947978:S	55143	CDCA8	cell division cycle associated 8	2
TL00474	chr1:38195238-38228348:A	10946	SF3A3	splicing factor 3a, subunit 3, 60kDa	2
TL00494	chr1:40278841-40310908:S	10487	CAP1	CAP, adenylate cyclase-associated protein 1 (yeast)	2
TL00526	chr1:43055362-43083247:S	114625	ERMAP	erythroblast membrane-associated protein (Scianna blood group)	2
TL00530	chr1:43402441-43410518:A	10969	EBNA1BP2	EBNA1 binding protein 2	2
TL00547	chr1:44208239-44211630:S	1802	DPH2	DPH2 homolog (S. cerevisiae)	2
TL00548	chr1:44213188-44216559:S	533	ATP6V0B	ATPase, H+ transporting, lysosomal 21kDa, V0 subunit b	2
TL00553	chr1:44451711-44458938:S	55929	DMAP1	DNA methyltransferase 1 associated protein 1	2
TL00574	chr1:45822303-45857154:S	4678	NASP	nuclear autoantigenic sperm protein (histone-binding)	2
TL00579	chr1:46041871-46274383:S	23139	MAST2	microtubule associated serine/threonine kinase 2	2
TL00584	chr1:46516658-46541625:A	10489	LRRC41	leucine rich repeat containing 41	2
TL00594	chr1:47037256-47057608:S	1580	CYP4B1	cytochrome P450, family 4, subfamily B, polypeptide 1	2
TL00603	chr1:48460990-48486903:S	200010	SLC5A9	solute carrier family 5 (sodium/glucose cotransporter), member 9	2
TL00615	chr1:52027453-52117197:A	4898	NRD1	nardilysin (N-arginine dibasic convertase)	2
TL00627	chr1:52964768-53063913:S	79699	ZYG11B	zyg-11 homolog B (C. elegans)	2
TL00649	chr1:54464782-54644680:A	23648	SSBP3	single stranded DNA binding protein 3	2
TL00656	chr1:55044323-55080525:S	163747	C1orf177	chromosome 1 open reading frame 177	2
TL00661	chr1:55304619-55453350:A	23358	USP24	ubiquitin specific peptidase 24	2
TL00664	chr1:56957064-57057957:A	199920	C1orf168	chromosome 1 open reading frame 168	2
TL00693	chr1:65503017-65654140:S	9829	DNAJC6	DnaJ (Hsp40) homolog, subfamily C, member 6	2
TL00736	chr1:77802777-77920931:A	26009	ZZZ3	zinc finger, ZZ-type containing 3	2
TL00739	chr1:78126787-78182166:S	91624	NEXN	nexilin (F actin binding protein)	2
TL00746	chr1:79128036-79245083:A	64123	ELTD1	EGF, latrophilin and seven transmembrane domain containing 1	2
TL00758	chr1:85163853-85235384:A	255231	MCOLN2	mucolipin 2	2
TL00765	chr1:85819047-85821978:S	3491	CYR61	cysteine-rich, angiogenic inducer, 61	2
TL00766	chr1:85891078-85946689:A	54680	C1orf181	chromosome 1 open reading frame 181	2
TL00768	chr1:86587007-86634591:A	57489	ODF2L	outer dense fiber of sperm tails 2-like	2
TL00796	chr1:92187515-92252573:S	676	BRDT	bromodomain, testis-specific	2
TL00814	chr1:94230981-94359293:A	24	ABCA4	ATP-binding cassette, sub-family A (ABC1), member 4	2
TL00815	chr1:94407050-94475895:A	9411	ARHGAP29	Rho GTPase activating protein 29	2
TL00823	chr1:96959965-97052936:S	58155	PTBP2	polypyrimidine tract binding protein 2	2
TL00828	chr1:99884185-99932847:S	54873	PALMD	palmdelphin	2
TL00829	chr1:99946846-100003937:A	391059	FRRS1	ferric-chelate reductase 1	2
TL00847	chr1:103898844-103923672:S	280	AMY2B	amylase, alpha 2B (pancreatic)	2
TL00848	chr1:103961521-103969923:S	279	AMY2A	amylase, alpha 2A (pancreatic)	2
TL00849	chr1:103999663-104008696:S	276|277|278	AMY1A|AMY1B|AMY1C	amylase, alpha 1A (salivary)|amylase, alpha 1B (salivary)|amylase, alpha 1C (salivary)	2
TL00850	chr1:104031562-104040596:A	276|277|278	AMY1A|AMY1B|AMY1C	amylase, alpha 1A (salivary)|amylase, alpha 1B (salivary)|amylase, alpha 1C (salivary)	2
TL00851	chr1:104093801-104102834:S	276|277|278	AMY1A|AMY1B|AMY1C	amylase, alpha 1A (salivary)|amylase, alpha 1B (salivary)|amylase, alpha 1C (salivary)	2
TL00855	chr1:108904493-108983472:S	284611	FAM102B	family with sequence similarity 102, member B	2
TL00860	chr1:109160047-109201239:A	254268	C1orf62	chromosome 1 open reading frame 62	2
TL00869	chr1:109623700-109627294:A	84722	PSRC1	proline/serine-rich coiled-coil 1	2
TL00878	chr1:109892708-109939975:S	2773	GNAI3	guanine nucleotide binding protein (G protein), alpha inhibiting activity polypeptide 3	2
TL00881	chr1:110000225-110009648:S	2948	GSTM4	glutathione S-transferase M4	2
TL00882	chr1:110012213-110019431:S	2946	GSTM2	glutathione S-transferase M2 (muscle)	2
TL00883	chr1:110031964-110037890:S	2944	GSTM1	glutathione S-transferase M1	2
TL00884	chr1:110056387-110062411:S	2949	GSTM5	glutathione S-transferase M5	2
TL00885	chr1:110078076-110084563:A	2947	GSTM3	glutathione S-transferase M3 (brain)	2
TL00921	chr1:113054138-113059473:A	333926	PPM1J	protein phosphatase 1J (PP2C domain containing)	2
TL00928	chr1:114157960-114215857:A	26191	PTPN22	protein tyrosine phosphatase, non-receptor type 22 (lymphoid)	2
TL00940	chr1:115061059-115102147:A	7812	CSDE1	cold shock domain containing E1, RNA-binding	2
TL00987	chr1:144218994-144222801:S	9939	RBM8A	RNA binding motif protein 8A	2
TL00991	chr1:144287344-144297903:S	10401	PIAS3	protein inhibitor of activated STAT, 3	2
TL00992	chr1:144297849-144300792:A	200035	NUDT17	nudix (nucleoside diphosphate linked moiety X)-type motif 17	2
TL01018	chr1:148167167-148174867:A	10903	MTMR11	myotubularin related protein 11	2
TL01023	chr1:148496841-148504103:S	23632	CA14	carbonic anhydrase XIV	2
TL01031	chr1:148747206-148752660:S	1893	ECM1	extracellular matrix protein 1	2
TL01041	chr1:149204272-149214064:A	29956	LASS2	LAG1 homolog, ceramide synthase 2	2
TL01053	chr1:149405140-149408238:S	79005	SCNM1	sodium channel modifier 1	2
TL01060	chr1:149579739-149586393:A	5993	RFX5	regulatory factor X, 5 (influences HLA class II expression)	2
TL01061	chr1:149603403-149611788:A	8991	SELENBP1	selenium binding protein 1	2
TL01067	chr1:149941453-149955914:A	11189	TNRC4	trinucleotide repeat containing 4	2
TL01126	chr1:151901137-151910103:A	3608	ILF2	interleukin enhancer binding factor 2, 45kDa	2
TL01136	chr1:152220750-152225430:A	5872	RAB13	RAB13, member RAS oncogene family	2
TL01138	chr1:152231791-152394216:A	91181	NUP210L	nucleoporin 210kDa-like	2
TL01143	chr1:152511662-152514978:S	10456	HAX1	HCLS1 associated protein X-1	2
TL01149	chr1:152787674-152797744:A	55585	UBE2Q1	ubiquitin-conjugating enzyme E2Q (putative) 1	2
TL01156	chr1:153201397-153213464:A	6464	SHC1	SHC (Src homology 2 domain containing) transforming protein 1	2
TL01158	chr1:153222440-153232211:S	80308	FLAD1	FAD1 flavin adenine dinucleotide synthetase homolog (S. cerevisiae)	2
TL01161	chr1:153257626-153272881:A	127579	DCST2	DC-STAMP domain containing 2	2
TL01174	chr1:153470866-153481112:A	2629	GBA	glucosidase, beta; acid (includes glucosylceramidase)	2
[truncated: 4,328 more rows]
